# Supplementary material for: Microevolution of Trypanosoma cruzi reveals hybridization and clonal mechanisms driving rapid genome diversification
Source: eLife. 2022 May 10;11:e75237. doi: 10.7554/eLife.75237 (PMC9098224; doi:10.7554/eLife.75237)
Supplement: Supplementary file 1. [file elife-75237-supp1.xlsx]

## Sheet: Sheet1
		Microsatellite Loci and Genotypes
Parasite line	Sample	10101(TA)			10101(TC)		MCLF10			7093(TA)c
Parental 1	Generation 0	160		164	104	106		183	185	182	186
	Generation 800 clone 1	160		164	104	106		183	185	182	186
	Generation 800 clone 2	160		164	104	106		183	185		nd
Parental 2	Generation 0		162	164	104		179				186	188
	Generation 800 clone 1		162	164	104		179				186	188
	Generation 800 clone 2		162	164	104		179				nd
	Generation 800 clone 3		162	164	104		179				nd
Hybrid 1D12	Generation 0	160	162	164	104	106	179	183	185	182	186	188
	Generation 800 clone 1	160	162	164	104	106	179	183	185	182	186	188
	Generation 800 clone 2	160	162	164	104	106	179	183	185	182	186	188
Hybrid 1C2	Generation 0	160	162	164	104	106	179	183	185	182	186	188
	Generation 800 clone 1	160	162	164	104	106	179	183	185	182	186	188
	Generation 800 clone 2	160	162	164	104	106	179	183	185	182	186	X
	Generation 800 clone 3	160	162	164	104	106	179	183	185	182	186	188
Hybrid 2C1	Generation 0	160	162	164	104	106	179	183	185	182	186	X
	Generation 800 clone 1	160	162	164	104	106	179	X	185	182	186	188
	Generation 800 clone 2	160	162	164	104	106	179	183	185	182	186	188
	Generation 800 clone 3	160	162	164	104	X	179	X	185	182	186	188
