# Supplementary material for: Microevolution of Trypanosoma cruzi reveals hybridization and clonal mechanisms driving rapid genome diversification
Source: eLife. 2022 May 10;11:e75237. doi: 10.7554/eLife.75237 (PMC9098224; doi:10.7554/eLife.75237)
Supplement: Supplementary file 2. [file elife-75237-supp2.xlsx]

## Sheet: Sheet1
Feature	P1	P2
Estimated genome size	46.1 Mb	44.9 Mb
Assembly Size	34.7 Mb	32.9 Mb
Number of scaffolds	544	493
Scaffolds > 100 Kb	114	96
Longest scaffold	886.4 Kb	2.1 Mb
Shortest scaffold	910 bp	882 bp
NG50	141.4 Kb	183.5 Kb
% of repeats	59.2	57.0
SNP rate	1/285	1/290
