# Supplementary material for: Microevolution of Trypanosoma cruzi reveals hybridization and clonal mechanisms driving rapid genome diversification
Source: eLife. 2022 May 10;11:e75237. doi: 10.7554/eLife.75237 (PMC9098224; doi:10.7554/eLife.75237)
Supplement: Supplementary file 3. [file elife-75237-supp3.xlsx]

## Sheet: Sheet2
	SNPs inherited from the parental strains
	Non-synonymous (NS)	Synonymous (S)	Nonsense	ratio NS/S
1C2-0	16366 (57.96%)	11557 (40.93%)	312 (1.11%)	1.41
1D12-0	15770 (57.71%)	11242 (41.14%)	312 (1.14%)	1.40
2C1-0	16615 (58.07)	11667 (40.78%)	328 (1.15%)	1.42
	SNPs common to all hybrids
	Non-synonymous (NS)	Synonymous (S)	Nonsense	ratio NS/S
1C2-0	3796 (69.06%)	1593 (28.98%)	108 (1.96%)	2.38
1D12-0	3459 (67.69%)	1540 (30.14%)	111 (2.17%)	2.25
2C1-0	3666 (68.12%)	1617 (30.04%)	99 (1.84%)	2.27
	SNPs exclusive to each hybrid clone
	Non-synonymous (NS)	Synonymous (S)	Nonsense	ratio NS/S
1C2-0	1711 (69.22%)	710 (28.72%)	51 (2.06%)	2.41
1D12-0	1553 (67.67%)	696 (30.33%)	46 (2.00%)	2.23
2C1-0	1551 (69.09%)	654 (29.13%)	40 (1.78%)	2.37
