# Supplementary material for: Microevolution of Trypanosoma cruzi reveals hybridization and clonal mechanisms driving rapid genome diversification
Source: eLife. 2022 May 10;11:e75237. doi: 10.7554/eLife.75237 (PMC9098224; doi:10.7554/eLife.75237)
Supplement: Supplementary file 4. [file elife-75237-supp4.xlsx]

## Sheet: Sheet3
1C2-0		SNPs in SM genes	SNPs in other genes	Ratio SM/other genes
	SNPs inherited from the parental strains	4766	23390	0.20
	SNPs common to all hybrids	1398	1619	0.86
	SNPs exclusive to each hybrid clone	1040	1423	0.73
1D12-0		SNPs in SM genes	SNPs in other genes	Ratio SM/other genes
	SNPs inherited from the parental strains	4683	22562	0.21
	SNPs common to all hybrids	1268	1538	0.82
	SNPs exclusive to each hybrid clone	1002	1285	0.78
2C1-0		SNPs in SM genes	SNPs in other genes	Ratio SM/other genes
	SNPs inherited from the parental strains	4864	23660	0.21
	SNPs common to all hybrids	1431	1695	0.84
	SNPs exclusive to each hybrid clone	973	1262	0.77
