# Supplementary material for: Microevolution of Trypanosoma cruzi reveals hybridization and clonal mechanisms driving rapid genome diversification
Source: eLife. 2022 May 10;11:e75237. doi: 10.7554/eLife.75237 (PMC9098224; doi:10.7554/eLife.75237)
Supplement: Supplementary file 5. [file elife-75237-supp5.xlsx]

## Sheet: Sheet1
	Non-synonymous SNPs inherited from parental strains			Non-synonymous SNPs after hybridization event
	SNPs in SM genes	SNPs in other genes	Ratio SM/other genes	SNPs in SM genes	SNPs in other genes	Ratio SM/other genes
1C2-0	3067	13110	0.23	1646	2084	0.79
1D12-0	3029	12570	0.24	1516	1890	0.80
2C1-0	3161	13262	0.24	1607	2002	0.80
