# Supplementary material for: Microevolution of Trypanosoma cruzi reveals hybridization and clonal mechanisms driving rapid genome diversification
Source: eLife. 2022 May 10;11:e75237. doi: 10.7554/eLife.75237 (PMC9098224; doi:10.7554/eLife.75237)
Supplement: Supplementary file 6. — Bgd count: Number of genes with this term in the genome; Result count: Number of genes with this term in our analysis; Pct of bgd: The percent of genes with this term in our analysis divided by the percent of genes with this term in the genome; Fold enrichment: Of the genes in the genome with this term, the percent that are present in your analysis. [file elife-75237-supp6.xlsx]

## Sheet: Table 7 - GO gene expansion par
ID	Name	Bgd count	Result count	Result gene list	Pct of bgd	Fold enrichment	Odds ratio	P-value	Benjamini	Bonferroni
GO:0030001	metal ion transport	28	13	TcSYL_0180940,TcSYL_0180950,TcSYL_0180960,TcSYL_0180970,TcSYL_0180980,TcSYL_0180990,TcSYL_0181010,TcSYL_0181190,TcSYL_0181210,TcSYL_0181220,TcSYL_0181240,TcSYL_0181260,TcSYL_0181330,	46.4	5.14	9.11	2.18786239634e-07	7.65751838719e-05	7.65751838719e-05
GO:0055085	transmembrane transport	86	22	TcSYL_0027700,TcSYL_0107950,TcSYL_0107960,TcSYL_0107970,TcSYL_0107980,TcSYL_0107990,TcSYL_0108030,TcSYL_0159800,TcSYL_0174330,TcSYL_0180940,TcSYL_0180950,TcSYL_0180960,TcSYL_0180970,TcSYL_0180980,TcSYL_0180990,TcSYL_0181010,TcSYL_0181190,TcSYL_0181210,TcSYL_0181220,TcSYL_0181240,TcSYL_0181260,TcSYL_0181330,	25.6	2.83	3.67	3.86772162207e-06	0.000676851283863	0.00135370256773
GO:0006812	cation transport	46	15	TcSYL_0159800,TcSYL_0174330,TcSYL_0180940,TcSYL_0180950,TcSYL_0180960,TcSYL_0180970,TcSYL_0180980,TcSYL_0180990,TcSYL_0181010,TcSYL_0181190,TcSYL_0181210,TcSYL_0181220,TcSYL_0181240,TcSYL_0181260,TcSYL_0181330,	32.6	3.61	5.1	5.80496478924e-06	0.000677245892078	0.00203173767623
GO:0006811	ion transport	54	16	TcSYL_0027700,TcSYL_0159800,TcSYL_0174330,TcSYL_0180940,TcSYL_0180950,TcSYL_0180960,TcSYL_0180970,TcSYL_0180980,TcSYL_0180990,TcSYL_0181010,TcSYL_0181190,TcSYL_0181210,TcSYL_0181220,TcSYL_0181240,TcSYL_0181260,TcSYL_0181330,	29.6	3.28	4.44	1.13928627078e-05	0.000996875486933	0.00398750194773
GO:0035556	intracellular signal transduction	12	7	TcSYL_0003710,TcSYL_0083140,TcSYL_0083170,TcSYL_0107750,TcSYL_0107800,TcSYL_0107830,TcSYL_0200950,	58.3	6.46	14.44	2.42205133013e-05	0.00169543593109	0.00847717965545
GO:0009190	cyclic nucleotide biosynthetic process	9	6	TcSYL_0003710,TcSYL_0083140,TcSYL_0083170,TcSYL_0107750,TcSYL_0107800,TcSYL_0107830,	66.7	7.38	20.57	3.42061730035e-05	0.00171030865018	0.0119721605512
GO:0009187	cyclic nucleotide metabolic process	9	6	TcSYL_0003710,TcSYL_0083140,TcSYL_0083170,TcSYL_0107750,TcSYL_0107800,TcSYL_0107830,	66.7	7.38	20.57	3.42061730035e-05	0.00171030865018	0.0119721605512
GO:1901293	nucleoside phosphate biosynthetic process	37	12	TcSYL_0003710,TcSYL_0010190,TcSYL_0083140,TcSYL_0083170,TcSYL_0106830,TcSYL_0107750,TcSYL_0107800,TcSYL_0107830,TcSYL_0111190,TcSYL_0111200,TcSYL_0111210,TcSYL_0159500,	32.4	3.59	5.01	5.46415405335e-05	0.00212494879852	0.0191245391867
GO:0009165	nucleotide biosynthetic process	37	12	TcSYL_0003710,TcSYL_0010190,TcSYL_0083140,TcSYL_0083170,TcSYL_0106830,TcSYL_0107750,TcSYL_0107800,TcSYL_0107830,TcSYL_0111190,TcSYL_0111200,TcSYL_0111210,TcSYL_0159500,	32.4	3.59	5.01	5.46415405335e-05	0.00212494879852	0.0191245391867
GO:0090407	organophosphate biosynthetic process	44	13	TcSYL_0003710,TcSYL_0010190,TcSYL_0026510,TcSYL_0083140,TcSYL_0083170,TcSYL_0106830,TcSYL_0107750,TcSYL_0107800,TcSYL_0107830,TcSYL_0111190,TcSYL_0111200,TcSYL_0111210,TcSYL_0159500,	29.5	3.27	4.38	8.00505823935e-05	0.00280177038377	0.0280177038377
GO:0009117	nucleotide metabolic process	43	12	TcSYL_0003710,TcSYL_0010190,TcSYL_0083140,TcSYL_0083170,TcSYL_0106830,TcSYL_0107750,TcSYL_0107800,TcSYL_0107830,TcSYL_0111190,TcSYL_0111200,TcSYL_0111210,TcSYL_0159500,	27.9	3.09	4.03	0.000275440804976	0.00876402561288	0.0964042817417
GO:0019637	organophosphate metabolic process	56	14	TcSYL_0003710,TcSYL_0010190,TcSYL_0026510,TcSYL_0057280,TcSYL_0083140,TcSYL_0083170,TcSYL_0106830,TcSYL_0107750,TcSYL_0107800,TcSYL_0107830,TcSYL_0111190,TcSYL_0111200,TcSYL_0111210,TcSYL_0159500,	25.0	2.77	3.48	0.000307343988909	0.00896419967653	0.107570396118
GO:0006753	nucleoside phosphate metabolic process	44	12	TcSYL_0003710,TcSYL_0010190,TcSYL_0083140,TcSYL_0083170,TcSYL_0106830,TcSYL_0107750,TcSYL_0107800,TcSYL_0107830,TcSYL_0111190,TcSYL_0111200,TcSYL_0111210,TcSYL_0159500,	27.3	3.02	3.9	0.000348712138446	0.00938840372739	0.122049248456
GO:0006793	phosphorus metabolic process	175	29	TcSYL_0003710,TcSYL_0010190,TcSYL_0013790,TcSYL_0026510,TcSYL_0027200,TcSYL_0027650,TcSYL_0057230,TcSYL_0057280,TcSYL_0057310,TcSYL_0057510,TcSYL_0057760,TcSYL_0058600,TcSYL_0083140,TcSYL_0083170,TcSYL_0105790,TcSYL_0106830,TcSYL_0107750,TcSYL_0107800,TcSYL_0107830,TcSYL_0111190,TcSYL_0111200,TcSYL_0111210,TcSYL_0156660,TcSYL_0156760,TcSYL_0156900,TcSYL_0156910,TcSYL_0158520,TcSYL_0159500,TcSYL_0…	16.6	1.84	2.12	0.00073050130545	0.0170450304605	0.255675456907
GO:0006796	phosphate-containing compound metabolic process	175	29	TcSYL_0003710,TcSYL_0010190,TcSYL_0013790,TcSYL_0026510,TcSYL_0027200,TcSYL_0027650,TcSYL_0057230,TcSYL_0057280,TcSYL_0057310,TcSYL_0057510,TcSYL_0057760,TcSYL_0058600,TcSYL_0083140,TcSYL_0083170,TcSYL_0105790,TcSYL_0106830,TcSYL_0107750,TcSYL_0107800,TcSYL_0107830,TcSYL_0111190,TcSYL_0111200,TcSYL_0111210,TcSYL_0156660,TcSYL_0156760,TcSYL_0156900,TcSYL_0156910,TcSYL_0158520,TcSYL_0159500,TcSYL_0…	16.6	1.84	2.12	0.00073050130545	0.0170450304605	0.255675456907
GO:0007165	signal transduction	20	7	TcSYL_0003710,TcSYL_0083140,TcSYL_0083170,TcSYL_0107750,TcSYL_0107800,TcSYL_0107830,TcSYL_0200950,	35.0	3.88	5.54	0.0012546828074	0.027446186412	0.439138982592
GO:0007154	cell communication	21	7	TcSYL_0003710,TcSYL_0083140,TcSYL_0083170,TcSYL_0107750,TcSYL_0107800,TcSYL_0107830,TcSYL_0200950,	33.3	3.69	5.14	0.0017389555679	0.0338130249314	0.608634448765
GO:0023052	signaling	21	7	TcSYL_0003710,TcSYL_0083140,TcSYL_0083170,TcSYL_0107750,TcSYL_0107800,TcSYL_0107830,TcSYL_0200950,	33.3	3.69	5.14	0.0017389555679	0.0338130249314	0.608634448765
GO:0055086	nucleobase-containing small molecule metabolic process	53	12	TcSYL_0003710,TcSYL_0010190,TcSYL_0083140,TcSYL_0083170,TcSYL_0106830,TcSYL_0107750,TcSYL_0107800,TcSYL_0107830,TcSYL_0111190,TcSYL_0111200,TcSYL_0111210,TcSYL_0159500,	22.6	2.51	3.04	0.00210177584707	0.0387169234986	0.735621546473
GO:0034654	nucleobase-containing compound biosynthetic process	72	14	TcSYL_0003710,TcSYL_0010190,TcSYL_0044090,TcSYL_0083140,TcSYL_0083170,TcSYL_0106830,TcSYL_0107750,TcSYL_0107800,TcSYL_0107830,TcSYL_0111190,TcSYL_0111200,TcSYL_0111210,TcSYL_0159500,TcSYL_0179800,	19.4	2.15	2.51	0.0042010198911	0.0735178480943	1.0
GO:0051716	cellular response to stimulus	60	12	TcSYL_0003710,TcSYL_0083140,TcSYL_0083170,TcSYL_0107750,TcSYL_0107800,TcSYL_0107830,TcSYL_0170370,TcSYL_0171470,TcSYL_0171480,TcSYL_0174660,TcSYL_0180040,TcSYL_0200950,	20.0	2.22	2.59	0.00621022752401	0.103503792067	1.0
GO:0007018	microtubule-based movement	69	13	TcSYL_0023200,TcSYL_0027320,TcSYL_0027330,TcSYL_0114000,TcSYL_0123010,TcSYL_0158420,TcSYL_0158430,TcSYL_0159530,TcSYL_0159740,TcSYL_0159750,TcSYL_0167480,TcSYL_0173270,TcSYL_0174760,	18.8	2.09	2.4	0.00755488195024	0.114007325799	1.0
GO:0044248	cellular catabolic process	40	9	TcSYL_0026390,TcSYL_0058930,TcSYL_0103640,TcSYL_0111190,TcSYL_0111200,TcSYL_0111210,TcSYL_0180000,TcSYL_0180010,TcSYL_0180020,	22.5	2.49	2.99	0.00780235126462	0.114007325799	1.0
GO:0019438	aromatic compound biosynthetic process	77	14	TcSYL_0003710,TcSYL_0010190,TcSYL_0044090,TcSYL_0083140,TcSYL_0083170,TcSYL_0106830,TcSYL_0107750,TcSYL_0107800,TcSYL_0107830,TcSYL_0111190,TcSYL_0111200,TcSYL_0111210,TcSYL_0159500,TcSYL_0179800,	18.2	2.01	2.3	0.00781764519764	0.114007325799	1.0
GO:0006928	movement of cell or subcellular component	72	13	TcSYL_0023200,TcSYL_0027320,TcSYL_0027330,TcSYL_0114000,TcSYL_0123010,TcSYL_0158420,TcSYL_0158430,TcSYL_0159530,TcSYL_0159740,TcSYL_0159750,TcSYL_0167480,TcSYL_0173270,TcSYL_0174760,	18.1	2.0	2.28	0.0108369353698	0.151717095177	1.0
GO:0032259	methylation	6	3	TcSYL_0076490,TcSYL_0172540,TcSYL_0172550,	50.0	5.54	10.17	0.0118495004958	0.159512506674	1.0
GO:0018130	heterocycle biosynthetic process	82	14	TcSYL_0003710,TcSYL_0010190,TcSYL_0044090,TcSYL_0083140,TcSYL_0083170,TcSYL_0106830,TcSYL_0107750,TcSYL_0107800,TcSYL_0107830,TcSYL_0111190,TcSYL_0111200,TcSYL_0111210,TcSYL_0159500,TcSYL_0179800,	17.1	1.89	2.13	0.0135614322345	0.175796343781	1.0
GO:1901575	organic substance catabolic process	44	9	TcSYL_0026390,TcSYL_0058930,TcSYL_0103640,TcSYL_0111190,TcSYL_0111200,TcSYL_0111210,TcSYL_0180000,TcSYL_0180010,TcSYL_0180020,	20.5	2.27	2.64	0.0146928179932	0.177327113711	1.0
GO:0009056	catabolic process	44	9	TcSYL_0026390,TcSYL_0058930,TcSYL_0103640,TcSYL_0111190,TcSYL_0111200,TcSYL_0111210,TcSYL_0180000,TcSYL_0180010,TcSYL_0180020,	20.5	2.27	2.64	0.0146928179932	0.177327113711	1.0
GO:0019363	pyridine nucleotide biosynthetic process	12	4	TcSYL_0010190,TcSYL_0111190,TcSYL_0111200,TcSYL_0111210,	33.3	3.69	5.1	0.017969512271	0.184670195793	1.0
GO:0019359	nicotinamide nucleotide biosynthetic process	12	4	TcSYL_0010190,TcSYL_0111190,TcSYL_0111200,TcSYL_0111210,	33.3	3.69	5.1	0.017969512271	0.184670195793	1.0
GO:0072525	pyridine-containing compound biosynthetic process	12	4	TcSYL_0010190,TcSYL_0111190,TcSYL_0111200,TcSYL_0111210,	33.3	3.69	5.1	0.017969512271	0.184670195793	1.0
GO:0043632	modification-dependent macromolecule catabolic process	18	5	TcSYL_0026390,TcSYL_0103640,TcSYL_0180000,TcSYL_0180010,TcSYL_0180020,	27.8	3.08	3.93	0.0185592253958	0.184670195793	1.0
GO:0006511	ubiquitin-dependent protein catabolic process	18	5	TcSYL_0026390,TcSYL_0103640,TcSYL_0180000,TcSYL_0180010,TcSYL_0180020,	27.8	3.08	3.93	0.0185592253958	0.184670195793	1.0
GO:0019941	modification-dependent protein catabolic process	18	5	TcSYL_0026390,TcSYL_0103640,TcSYL_0180000,TcSYL_0180010,TcSYL_0180020,	27.8	3.08	3.93	0.0185592253958	0.184670195793	1.0
GO:0006810	transport	200	27	TcSYL_0027700,TcSYL_0057250,TcSYL_0073580,TcSYL_0107950,TcSYL_0107960,TcSYL_0107970,TcSYL_0107980,TcSYL_0107990,TcSYL_0108030,TcSYL_0123020,TcSYL_0156540,TcSYL_0159800,TcSYL_0173510,TcSYL_0174330,TcSYL_0180940,TcSYL_0180950,TcSYL_0180960,TcSYL_0180970,TcSYL_0180980,TcSYL_0180990,TcSYL_0181010,TcSYL_0181190,TcSYL_0181210,TcSYL_0181220,TcSYL_0181240,TcSYL_0181260,TcSYL_0181330,	13.5	1.5	1.63	0.0195222778409	0.184670195793	1.0
GO:0051234	establishment of localization	200	27	TcSYL_0027700,TcSYL_0057250,TcSYL_0073580,TcSYL_0107950,TcSYL_0107960,TcSYL_0107970,TcSYL_0107980,TcSYL_0107990,TcSYL_0108030,TcSYL_0123020,TcSYL_0156540,TcSYL_0159800,TcSYL_0173510,TcSYL_0174330,TcSYL_0180940,TcSYL_0180950,TcSYL_0180960,TcSYL_0180970,TcSYL_0180980,TcSYL_0180990,TcSYL_0181010,TcSYL_0181190,TcSYL_0181210,TcSYL_0181220,TcSYL_0181240,TcSYL_0181260,TcSYL_0181330,	13.5	1.5	1.63	0.0195222778409	0.184670195793	1.0
GO:1901362	organic cyclic compound biosynthetic process	86	14	TcSYL_0003710,TcSYL_0010190,TcSYL_0044090,TcSYL_0083140,TcSYL_0083170,TcSYL_0106830,TcSYL_0107750,TcSYL_0107800,TcSYL_0107830,TcSYL_0111190,TcSYL_0111200,TcSYL_0111210,TcSYL_0159500,TcSYL_0179800,	16.3	1.8	2.01	0.020159863632	0.185682954505	1.0
GO:0016310	phosphorylation	121	18	TcSYL_0013790,TcSYL_0027200,TcSYL_0027650,TcSYL_0057230,TcSYL_0057280,TcSYL_0057310,TcSYL_0057510,TcSYL_0057760,TcSYL_0058600,TcSYL_0105790,TcSYL_0111190,TcSYL_0111200,TcSYL_0111210,TcSYL_0156660,TcSYL_0156760,TcSYL_0156900,TcSYL_0156910,TcSYL_0158520,	14.9	1.65	1.81	0.0218823051802	0.194829018558	1.0
GO:0072524	pyridine-containing compound metabolic process	13	4	TcSYL_0010190,TcSYL_0111190,TcSYL_0111200,TcSYL_0111210,	30.8	3.41	4.53	0.0241519242889	0.194829018558	1.0
GO:0006091	generation of precursor metabolites and energy	13	4	TcSYL_0111190,TcSYL_0111200,TcSYL_0111210,TcSYL_0174840,	30.8	3.41	4.53	0.0241519242889	0.194829018558	1.0
GO:0046496	nicotinamide nucleotide metabolic process	13	4	TcSYL_0010190,TcSYL_0111190,TcSYL_0111200,TcSYL_0111210,	30.8	3.41	4.53	0.0241519242889	0.194829018558	1.0
GO:0019362	pyridine nucleotide metabolic process	13	4	TcSYL_0010190,TcSYL_0111190,TcSYL_0111200,TcSYL_0111210,	30.8	3.41	4.53	0.0241519242889	0.194829018558	1.0
GO:0051179	localization	204	27	TcSYL_0027700,TcSYL_0057250,TcSYL_0073580,TcSYL_0107950,TcSYL_0107960,TcSYL_0107970,TcSYL_0107980,TcSYL_0107990,TcSYL_0108030,TcSYL_0123020,TcSYL_0156540,TcSYL_0159800,TcSYL_0173510,TcSYL_0174330,TcSYL_0180940,TcSYL_0180950,TcSYL_0180960,TcSYL_0180970,TcSYL_0180980,TcSYL_0180990,TcSYL_0181010,TcSYL_0181190,TcSYL_0181210,TcSYL_0181220,TcSYL_0181240,TcSYL_0181260,TcSYL_0181330,	13.2	1.47	1.59	0.0247321596865	0.194829018558	1.0
GO:0007017	microtubule-based process	80	13	TcSYL_0023200,TcSYL_0027320,TcSYL_0027330,TcSYL_0114000,TcSYL_0123010,TcSYL_0158420,TcSYL_0158430,TcSYL_0159530,TcSYL_0159740,TcSYL_0159750,TcSYL_0167480,TcSYL_0173270,TcSYL_0174760,	16.3	1.8	2.0	0.0250494452432	0.194829018558	1.0
GO:0065007	biological regulation	81	13	TcSYL_0003710,TcSYL_0025840,TcSYL_0057200,TcSYL_0058930,TcSYL_0064420,TcSYL_0064430,TcSYL_0083140,TcSYL_0083170,TcSYL_0105800,TcSYL_0107750,TcSYL_0107800,TcSYL_0107830,TcSYL_0200950,	16.0	1.78	1.97	0.0275041697954	0.209270857139	1.0
GO:0050794	regulation of cellular process	73	12	TcSYL_0003710,TcSYL_0025840,TcSYL_0057200,TcSYL_0064420,TcSYL_0064430,TcSYL_0083140,TcSYL_0083170,TcSYL_0105800,TcSYL_0107750,TcSYL_0107800,TcSYL_0107830,TcSYL_0200950,	16.4	1.82	2.03	0.0283136933779	0.210846652814	1.0
GO:1901565	organonitrogen compound catabolic process	27	6	TcSYL_0026390,TcSYL_0058930,TcSYL_0103640,TcSYL_0180000,TcSYL_0180010,TcSYL_0180020,	22.2	2.46	2.92	0.02993998513	0.218312391573	1.0
GO:0050789	regulation of biological process	74	12	TcSYL_0003710,TcSYL_0025840,TcSYL_0057200,TcSYL_0064420,TcSYL_0064430,TcSYL_0083140,TcSYL_0083170,TcSYL_0105800,TcSYL_0107750,TcSYL_0107800,TcSYL_0107830,TcSYL_0200950,	16.2	1.8	1.99	0.0311656402845	0.222611716318	1.0
GO:0072330	monocarboxylic acid biosynthetic process	15	4	TcSYL_0057340,TcSYL_0111190,TcSYL_0111200,TcSYL_0111210,	26.7	2.95	3.7	0.0399528719893	0.272430532307	1.0
GO:0006733	oxidoreduction coenzyme metabolic process	15	4	TcSYL_0010190,TcSYL_0111190,TcSYL_0111200,TcSYL_0111210,	26.7	2.95	3.7	0.0399528719893	0.272430532307	1.0
