# Supplementary material for: Microevolution of Trypanosoma cruzi reveals hybridization and clonal mechanisms driving rapid genome diversification
Source: eLife. 2022 May 10;11:e75237. doi: 10.7554/eLife.75237 (PMC9098224; doi:10.7554/eLife.75237)
Supplement: Supplementary file 7. — Bgd count: Number of genes with this term in the genome; Result count: Number of genes with this term in our analysis; Pct of bgd: The percent of genes with this term in our analysis divided by the percent of genes with this term in the genome; Fold enrichment: Of the genes in the genome with this term, the percent that are present in your analysis. [file elife-75237-supp7.xlsx]

## Sheet: Table 8 - GO gene contraction p
ID	Name	Bgd count	Result count	Result gene list	Pct of bgd	Fold enrichment	Odds ratio	P-value	Benjamini	Bonferroni
GO:0022610	biological adhesion	145	47	TcSYL_0021850,TcSYL_0021930,TcSYL_0041300,TcSYL_0041310,TcSYL_0041320,TcSYL_0044220,TcSYL_0044230,TcSYL_0044270,TcSYL_0044300,TcSYL_0044310,TcSYL_0044350,TcSYL_0044360,TcSYL_0044400,TcSYL_0044410,TcSYL_0044420,TcSYL_0071040,TcSYL_0071830,TcSYL_0071840,TcSYL_0072130,TcSYL_0074310,TcSYL_0080140,TcSYL_0091640,TcSYL_0091900,TcSYL_0100150,TcSYL_0100160,TcSYL_0101360,TcSYL_0101770,TcSYL_0101810,TcSYL_0…	32.4	4.59	7.78	6.03366285069e-21	8.08510821992e-19	1.61702164398e-18
GO:0007155	cell adhesion	145	47	TcSYL_0021850,TcSYL_0021930,TcSYL_0041300,TcSYL_0041310,TcSYL_0041320,TcSYL_0044220,TcSYL_0044230,TcSYL_0044270,TcSYL_0044300,TcSYL_0044310,TcSYL_0044350,TcSYL_0044360,TcSYL_0044400,TcSYL_0044410,TcSYL_0044420,TcSYL_0071040,TcSYL_0071830,TcSYL_0071840,TcSYL_0072130,TcSYL_0074310,TcSYL_0080140,TcSYL_0091640,TcSYL_0091900,TcSYL_0100150,TcSYL_0100160,TcSYL_0101360,TcSYL_0101770,TcSYL_0101810,TcSYL_0…	32.4	4.59	7.78	6.03366285069e-21	8.08510821992e-19	1.61702164398e-18
GO:0006508	proteolysis	295	51	TcSYL_0021850,TcSYL_0021930,TcSYL_0041300,TcSYL_0041310,TcSYL_0041320,TcSYL_0044220,TcSYL_0044230,TcSYL_0044270,TcSYL_0044300,TcSYL_0044310,TcSYL_0044350,TcSYL_0044360,TcSYL_0044400,TcSYL_0044410,TcSYL_0044420,TcSYL_0071040,TcSYL_0071830,TcSYL_0071840,TcSYL_0072130,TcSYL_0074310,TcSYL_0080140,TcSYL_0080800,TcSYL_0080820,TcSYL_0091640,TcSYL_0091900,TcSYL_0100150,TcSYL_0100160,TcSYL_0101360,TcSYL_0…	17.3	2.45	3.29	2.33523228615e-10	2.0861408423e-08	6.25842252689e-08
GO:0019538	protein metabolic process	619	80	TcSYL_0021850,TcSYL_0021930,TcSYL_0041300,TcSYL_0041310,TcSYL_0041320,TcSYL_0044220,TcSYL_0044230,TcSYL_0044270,TcSYL_0044300,TcSYL_0044310,TcSYL_0044350,TcSYL_0044360,TcSYL_0044400,TcSYL_0044410,TcSYL_0044420,TcSYL_0048680,TcSYL_0071040,TcSYL_0071830,TcSYL_0071840,TcSYL_0072130,TcSYL_0072250,TcSYL_0072390,TcSYL_0072410,TcSYL_0074130,TcSYL_0074310,TcSYL_0074480,TcSYL_0074490,TcSYL_0074500,TcSYL_0…	12.9	1.83	2.51	2.13203850206e-09	1.42846579638e-07	5.71386318551e-07
GO:1901564	organonitrogen compound metabolic process	705	83	TcSYL_0021850,TcSYL_0021930,TcSYL_0041300,TcSYL_0041310,TcSYL_0041320,TcSYL_0044220,TcSYL_0044230,TcSYL_0044270,TcSYL_0044300,TcSYL_0044310,TcSYL_0044350,TcSYL_0044360,TcSYL_0044400,TcSYL_0044410,TcSYL_0044420,TcSYL_0048680,TcSYL_0071040,TcSYL_0071830,TcSYL_0071840,TcSYL_0072130,TcSYL_0072250,TcSYL_0072390,TcSYL_0072410,TcSYL_0074130,TcSYL_0074310,TcSYL_0074480,TcSYL_0074490,TcSYL_0074500,TcSYL_0…	11.8	1.67	2.22	9.82313880535e-08	5.26520239967e-06	2.63260119983e-05
GO:0043170	macromolecule metabolic process	754	86	TcSYL_0021850,TcSYL_0021930,TcSYL_0041300,TcSYL_0041310,TcSYL_0041320,TcSYL_0044220,TcSYL_0044230,TcSYL_0044270,TcSYL_0044300,TcSYL_0044310,TcSYL_0044350,TcSYL_0044360,TcSYL_0044400,TcSYL_0044410,TcSYL_0044420,TcSYL_0048680,TcSYL_0052750,TcSYL_0071040,TcSYL_0071830,TcSYL_0071840,TcSYL_0072130,TcSYL_0072250,TcSYL_0072390,TcSYL_0072410,TcSYL_0074130,TcSYL_0074310,TcSYL_0074480,TcSYL_0074490,TcSYL_0…	11.4	1.62	2.15	2.3058777131e-07	1.02995871185e-05	6.17975227111e-05
GO:0042026	protein refolding	8	6	TcSYL_0011280,TcSYL_0011360,TcSYL_0011390,TcSYL_0011400,TcSYL_0011410,TcSYL_0011440,	75.0	10.63	40.61	2.86680311602e-06	0.000109757605013	0.000768303235094
GO:0006807	nitrogen compound metabolic process	859	89	TcSYL_0021850,TcSYL_0021930,TcSYL_0041300,TcSYL_0041310,TcSYL_0041320,TcSYL_0044220,TcSYL_0044230,TcSYL_0044270,TcSYL_0044300,TcSYL_0044310,TcSYL_0044350,TcSYL_0044360,TcSYL_0044400,TcSYL_0044410,TcSYL_0044420,TcSYL_0048680,TcSYL_0052750,TcSYL_0071040,TcSYL_0071830,TcSYL_0071840,TcSYL_0072130,TcSYL_0072250,TcSYL_0072390,TcSYL_0072410,TcSYL_0074130,TcSYL_0074310,TcSYL_0074480,TcSYL_0074490,TcSYL_0…	10.4	1.47	1.88	1.14945476134e-05	0.00038506734505	0.0030805387604
GO:0044238	primary metabolic process	919	91	TcSYL_0021850,TcSYL_0021930,TcSYL_0041290,TcSYL_0041300,TcSYL_0041310,TcSYL_0041320,TcSYL_0044220,TcSYL_0044230,TcSYL_0044270,TcSYL_0044300,TcSYL_0044310,TcSYL_0044350,TcSYL_0044360,TcSYL_0044400,TcSYL_0044410,TcSYL_0044420,TcSYL_0048680,TcSYL_0052750,TcSYL_0071040,TcSYL_0071830,TcSYL_0071840,TcSYL_0072130,TcSYL_0072250,TcSYL_0072390,TcSYL_0072410,TcSYL_0074130,TcSYL_0074310,TcSYL_0074480,TcSYL_0…	9.9	1.4	1.77	6.11306858779e-05	0.00182033597947	0.0163830238153
GO:0071704	organic substance metabolic process	946	91	TcSYL_0021850,TcSYL_0021930,TcSYL_0041290,TcSYL_0041300,TcSYL_0041310,TcSYL_0041320,TcSYL_0044220,TcSYL_0044230,TcSYL_0044270,TcSYL_0044300,TcSYL_0044310,TcSYL_0044350,TcSYL_0044360,TcSYL_0044400,TcSYL_0044410,TcSYL_0044420,TcSYL_0048680,TcSYL_0052750,TcSYL_0071040,TcSYL_0071830,TcSYL_0071840,TcSYL_0072130,TcSYL_0072250,TcSYL_0072390,TcSYL_0072410,TcSYL_0074130,TcSYL_0074310,TcSYL_0074480,TcSYL_0…	9.6	1.36	1.69	0.000200558187824	0.00537495943369	0.0537495943369
GO:0006414	translational elongation	27	8	TcSYL_0072250,TcSYL_0072390,TcSYL_0072410,TcSYL_0074130,TcSYL_0109160,TcSYL_0109180,TcSYL_0124670,TcSYL_0130650,	29.6	4.2	5.72	0.000370722278622	0.00903214278825	0.0993535706707
GO:0006904	vesicle docking involved in exocytosis	20	6	TcSYL_0156210,TcSYL_0156260,TcSYL_0156280,TcSYL_0156370,TcSYL_0156390,TcSYL_0156470,	30.0	4.25	5.78	0.00192667745742	0.0397191968145	0.516349558589
GO:0140029	exocytic process	20	6	TcSYL_0156210,TcSYL_0156260,TcSYL_0156280,TcSYL_0156370,TcSYL_0156390,TcSYL_0156470,	30.0	4.25	5.78	0.00192667745742	0.0397191968145	0.516349558589
GO:0048278	vesicle docking	21	6	TcSYL_0156210,TcSYL_0156260,TcSYL_0156280,TcSYL_0156370,TcSYL_0156390,TcSYL_0156470,	28.6	4.05	5.39	0.00254094863955	0.0400573079647	0.680974235399
GO:0022406	membrane docking	21	6	TcSYL_0156210,TcSYL_0156260,TcSYL_0156280,TcSYL_0156370,TcSYL_0156390,TcSYL_0156470,	28.6	4.05	5.39	0.00254094863955	0.0400573079647	0.680974235399
GO:0140056	organelle localization by membrane tethering	21	6	TcSYL_0156210,TcSYL_0156260,TcSYL_0156280,TcSYL_0156370,TcSYL_0156390,TcSYL_0156470,	28.6	4.05	5.39	0.00254094863955	0.0400573079647	0.680974235399
GO:0051640	organelle localization	21	6	TcSYL_0156210,TcSYL_0156260,TcSYL_0156280,TcSYL_0156370,TcSYL_0156390,TcSYL_0156470,	28.6	4.05	5.39	0.00254094863955	0.0400573079647	0.680974235399
GO:0046903	secretion	23	6	TcSYL_0156210,TcSYL_0156260,TcSYL_0156280,TcSYL_0156370,TcSYL_0156390,TcSYL_0156470,	26.1	3.7	4.75	0.00419565542958	0.0562217827564	1.0
GO:0032940	secretion by cell	23	6	TcSYL_0156210,TcSYL_0156260,TcSYL_0156280,TcSYL_0156370,TcSYL_0156390,TcSYL_0156470,	26.1	3.7	4.75	0.00419565542958	0.0562217827564	1.0
GO:0006887	exocytosis	23	6	TcSYL_0156210,TcSYL_0156260,TcSYL_0156280,TcSYL_0156370,TcSYL_0156390,TcSYL_0156470,	26.1	3.7	4.75	0.00419565542958	0.0562217827564	1.0
GO:0051641	cellular localization	64	11	TcSYL_0010940,TcSYL_0118150,TcSYL_0118170,TcSYL_0145210,TcSYL_0145540,TcSYL_0156210,TcSYL_0156260,TcSYL_0156280,TcSYL_0156370,TcSYL_0156390,TcSYL_0156470,	17.2	2.44	2.83	0.00443536966561	0.0566037652563	1.0
GO:0008152	metabolic process	1336	112	TcSYL_0019380,TcSYL_0021850,TcSYL_0021930,TcSYL_0029710,TcSYL_0032900,TcSYL_0035410,TcSYL_0041290,TcSYL_0041300,TcSYL_0041310,TcSYL_0041320,TcSYL_0044220,TcSYL_0044230,TcSYL_0044270,TcSYL_0044300,TcSYL_0044310,TcSYL_0044350,TcSYL_0044360,TcSYL_0044400,TcSYL_0044410,TcSYL_0044420,TcSYL_0048680,TcSYL_0052750,TcSYL_0052760,TcSYL_0052790,TcSYL_0052830,TcSYL_0052850,TcSYL_0052860,TcSYL_0052870,TcSYL_0…	8.4	1.19	1.42	0.00742666268892	0.0904702545742	1.0
GO:0008150	biological process	1769	140	TcSYL_0009010,TcSYL_0009610,TcSYL_0010940,TcSYL_0011280,TcSYL_0011360,TcSYL_0011390,TcSYL_0011400,TcSYL_0011410,TcSYL_0011440,TcSYL_0019380,TcSYL_0021850,TcSYL_0021930,TcSYL_0027400,TcSYL_0027410,TcSYL_0029710,TcSYL_0032900,TcSYL_0035410,TcSYL_0041290,TcSYL_0041300,TcSYL_0041310,TcSYL_0041320,TcSYL_0044220,TcSYL_0044230,TcSYL_0044270,TcSYL_0044300,TcSYL_0044310,TcSYL_0044350,TcSYL_0044360,TcSYL_0…	7.9	1.12	1.37	0.0178851504994	0.20840088408	1.0
GO:0006412	translation	167	19	TcSYL_0048680,TcSYL_0072250,TcSYL_0072390,TcSYL_0072410,TcSYL_0074130,TcSYL_0074480,TcSYL_0074490,TcSYL_0074500,TcSYL_0074510,TcSYL_0109160,TcSYL_0109180,TcSYL_0115410,TcSYL_0118190,TcSYL_0123330,TcSYL_0123380,TcSYL_0123440,TcSYL_0124670,TcSYL_0130650,TcSYL_0201640,	11.4	1.61	1.76	0.023678872186	0.264414072743	1.0
GO:0043043	peptide biosynthetic process	170	19	TcSYL_0048680,TcSYL_0072250,TcSYL_0072390,TcSYL_0072410,TcSYL_0074130,TcSYL_0074480,TcSYL_0074490,TcSYL_0074500,TcSYL_0074510,TcSYL_0109160,TcSYL_0109180,TcSYL_0115410,TcSYL_0118190,TcSYL_0123330,TcSYL_0123380,TcSYL_0123440,TcSYL_0124670,TcSYL_0130650,TcSYL_0201640,	11.2	1.58	1.72	0.0279808852857	0.299955090263	1.0
GO:0043604	amide biosynthetic process	172	19	TcSYL_0048680,TcSYL_0072250,TcSYL_0072390,TcSYL_0072410,TcSYL_0074130,TcSYL_0074480,TcSYL_0074490,TcSYL_0074500,TcSYL_0074510,TcSYL_0109160,TcSYL_0109180,TcSYL_0115410,TcSYL_0118190,TcSYL_0123330,TcSYL_0123380,TcSYL_0123440,TcSYL_0124670,TcSYL_0130650,TcSYL_0201640,	11.0	1.57	1.7	0.0311618068816	0.321117742085	1.0
GO:0006518	peptide metabolic process	173	19	TcSYL_0048680,TcSYL_0072250,TcSYL_0072390,TcSYL_0072410,TcSYL_0074130,TcSYL_0074480,TcSYL_0074490,TcSYL_0074500,TcSYL_0074510,TcSYL_0109160,TcSYL_0109180,TcSYL_0115410,TcSYL_0118190,TcSYL_0123330,TcSYL_0123380,TcSYL_0123440,TcSYL_0124670,TcSYL_0130650,TcSYL_0201640,	11.0	1.56	1.69	0.0328506325021	0.321117742085	1.0
GO:0016192	vesicle-mediated transport	64	9	TcSYL_0010940,TcSYL_0118150,TcSYL_0145540,TcSYL_0156210,TcSYL_0156260,TcSYL_0156280,TcSYL_0156370,TcSYL_0156390,TcSYL_0156470,	14.1	1.99	2.21	0.0335496148447	0.321117742085	1.0
GO:0043603	cellular amide metabolic process	175	19	TcSYL_0048680,TcSYL_0072250,TcSYL_0072390,TcSYL_0072410,TcSYL_0074130,TcSYL_0074480,TcSYL_0074490,TcSYL_0074500,TcSYL_0074510,TcSYL_0109160,TcSYL_0109180,TcSYL_0115410,TcSYL_0118190,TcSYL_0123330,TcSYL_0123380,TcSYL_0123440,TcSYL_0124670,TcSYL_0130650,TcSYL_0201640,	10.9	1.54	1.66	0.0364323072149	0.336684770124	1.0
