# Supplementary material for: Microevolution of Trypanosoma cruzi reveals hybridization and clonal mechanisms driving rapid genome diversification
Source: eLife. 2022 May 10;11:e75237. doi: 10.7554/eLife.75237 (PMC9098224; doi:10.7554/eLife.75237)
Supplement: Supplementary file 8. — Bgd count: Number of genes with this term in the genome; Result count: Number of genes with this term in our analysis; Pct of bgd: The percent of genes with this term in our analysis divided by the percent of genes with this term in the genome; Fold enrichment: Of the genes in the genome with this term, the percent that are present in your analysis. [file elife-75237-supp8.xlsx]

## Sheet: Table 9 - GO gene expansion hyb
ID	Name	Bgd count	Result count	Result gene list	Pct of bgd	Fold enrichment	Odds ratio	P-value	Benjamini	Bonferroni
GO:0006508	proteolysis	295	172	TcSYL_0001090,TcSYL_0013170,TcSYL_0013180,TcSYL_0019200,TcSYL_0020740,TcSYL_0020830,TcSYL_0020840,TcSYL_0021850,TcSYL_0021930,TcSYL_0024190,TcSYL_0024200,TcSYL_0028640,TcSYL_0028650,TcSYL_0028920,TcSYL_0028930,TcSYL_0030880,TcSYL_0030970,TcSYL_0042730,TcSYL_0042970,TcSYL_0043050,TcSYL_0044220,TcSYL_0044230,TcSYL_0044270,TcSYL_0044300,TcSYL_0044310,TcSYL_0044350,TcSYL_0044360,TcSYL_0044400,TcSYL_0…	58.3	1.89	3.62	5.61397308815e-25	3.13821095627e-22	3.13821095627e-22
GO:0043170	macromolecule metabolic process	754	328	TcSYL_0001090,TcSYL_0009100,TcSYL_0010760,TcSYL_0010880,TcSYL_0011150,TcSYL_0011470,TcSYL_0013170,TcSYL_0013180,TcSYL_0013790,TcSYL_0019200,TcSYL_0020740,TcSYL_0020830,TcSYL_0020840,TcSYL_0021850,TcSYL_0021930,TcSYL_0024190,TcSYL_0024200,TcSYL_0027200,TcSYL_0027280,TcSYL_0027510,TcSYL_0027570,TcSYL_0027620,TcSYL_0027650,TcSYL_0028640,TcSYL_0028650,TcSYL_0028920,TcSYL_0028930,TcSYL_0030620,TcSYL_0…	43.5	1.41	2.12	9.58782801906e-18	2.67979793133e-15	5.35959586266e-15
GO:0006807	nitrogen compound metabolic process	859	361	TcSYL_0001090,TcSYL_0003710,TcSYL_0009100,TcSYL_0010190,TcSYL_0010760,TcSYL_0010880,TcSYL_0011150,TcSYL_0011470,TcSYL_0013170,TcSYL_0013180,TcSYL_0013790,TcSYL_0017140,TcSYL_0017150,TcSYL_0019200,TcSYL_0020740,TcSYL_0020830,TcSYL_0020840,TcSYL_0021850,TcSYL_0021930,TcSYL_0024190,TcSYL_0024200,TcSYL_0027200,TcSYL_0027270,TcSYL_0027280,TcSYL_0027510,TcSYL_0027570,TcSYL_0027620,TcSYL_0027650,TcSYL_0…	42.0	1.37	2.02	8.90204716558e-17	1.65874812185e-14	4.97624436556e-14
GO:0019538	protein metabolic process	619	276	TcSYL_0001090,TcSYL_0009100,TcSYL_0010760,TcSYL_0010880,TcSYL_0011150,TcSYL_0013170,TcSYL_0013180,TcSYL_0013790,TcSYL_0019200,TcSYL_0020740,TcSYL_0020830,TcSYL_0020840,TcSYL_0021850,TcSYL_0021930,TcSYL_0024190,TcSYL_0024200,TcSYL_0027200,TcSYL_0027570,TcSYL_0027620,TcSYL_0027650,TcSYL_0028640,TcSYL_0028650,TcSYL_0028920,TcSYL_0028930,TcSYL_0030880,TcSYL_0030940,TcSYL_0030970,TcSYL_0031770,TcSYL_0…	44.6	1.45	2.14	2.98023984249e-16	4.16488517988e-14	1.66595407195e-13
GO:1901564	organonitrogen compound metabolic process	705	299	TcSYL_0001090,TcSYL_0009100,TcSYL_0010190,TcSYL_0010760,TcSYL_0010880,TcSYL_0011150,TcSYL_0013170,TcSYL_0013180,TcSYL_0013790,TcSYL_0017140,TcSYL_0017150,TcSYL_0019200,TcSYL_0020740,TcSYL_0020830,TcSYL_0020840,TcSYL_0021850,TcSYL_0021930,TcSYL_0024190,TcSYL_0024200,TcSYL_0027200,TcSYL_0027270,TcSYL_0027570,TcSYL_0027620,TcSYL_0027650,TcSYL_0028640,TcSYL_0028650,TcSYL_0028920,TcSYL_0028930,TcSYL_0…	42.4	1.38	1.96	5.33107757364e-14	5.96014472733e-12	2.98007236367e-11
GO:0071704	organic substance metabolic process	946	380	TcSYL_0001070,TcSYL_0001090,TcSYL_0003710,TcSYL_0009100,TcSYL_0010190,TcSYL_0010760,TcSYL_0010880,TcSYL_0011150,TcSYL_0011470,TcSYL_0013170,TcSYL_0013180,TcSYL_0013480,TcSYL_0013790,TcSYL_0017140,TcSYL_0017150,TcSYL_0019200,TcSYL_0020740,TcSYL_0020830,TcSYL_0020840,TcSYL_0021850,TcSYL_0021930,TcSYL_0022980,TcSYL_0024190,TcSYL_0024200,TcSYL_0027200,TcSYL_0027270,TcSYL_0027280,TcSYL_0027510,TcSYL_0…	40.2	1.31	1.85	7.68000272004e-14	7.15520253417e-12	4.2931215205e-11
GO:0044238	primary metabolic process	919	368	TcSYL_0001090,TcSYL_0003710,TcSYL_0009100,TcSYL_0010190,TcSYL_0010760,TcSYL_0010880,TcSYL_0011150,TcSYL_0011470,TcSYL_0013170,TcSYL_0013180,TcSYL_0013480,TcSYL_0013790,TcSYL_0019200,TcSYL_0020740,TcSYL_0020830,TcSYL_0020840,TcSYL_0021850,TcSYL_0021930,TcSYL_0022980,TcSYL_0024190,TcSYL_0024200,TcSYL_0027200,TcSYL_0027280,TcSYL_0027510,TcSYL_0027570,TcSYL_0027620,TcSYL_0027650,TcSYL_0028640,TcSYL_0…	40.0	1.3	1.82	4.96766766976e-13	3.96703746771e-11	2.77692622739e-10
GO:0008150	biological process	1769	604	TcSYL_0001070,TcSYL_0001080,TcSYL_0001090,TcSYL_0001100,TcSYL_0002050,TcSYL_0002080,TcSYL_0002120,TcSYL_0002160,TcSYL_0002190,TcSYL_0002220,TcSYL_0002290,TcSYL_0002320,TcSYL_0002350,TcSYL_0002380,TcSYL_0002410,TcSYL_0003710,TcSYL_0009100,TcSYL_0010190,TcSYL_0010760,TcSYL_0010880,TcSYL_0010940,TcSYL_0011060,TcSYL_0011090,TcSYL_0011150,TcSYL_0011210,TcSYL_0011440,TcSYL_0011450,TcSYL_0011470,TcSYL_0…	34.1	1.11	1.46	1.48466169287e-06	0.000103740735789	0.000829925886312
GO:0055085	transmembrane transport	86	45	TcSYL_0016880,TcSYL_0017060,TcSYL_0017070,TcSYL_0027700,TcSYL_0031380,TcSYL_0040100,TcSYL_0040160,TcSYL_0040550,TcSYL_0040760,TcSYL_0043070,TcSYL_0048010,TcSYL_0076960,TcSYL_0107950,TcSYL_0107960,TcSYL_0107970,TcSYL_0107980,TcSYL_0107990,TcSYL_0109650,TcSYL_0111700,TcSYL_0111950,TcSYL_0112040,TcSYL_0117190,TcSYL_0117210,TcSYL_0146120,TcSYL_0146130,TcSYL_0155950,TcSYL_0157440,TcSYL_0159800,TcSYL_0…	52.3	1.7	2.54	1.98552932255e-05	0.00123323432367	0.0110991089131
GO:0051179	localization	204	87	TcSYL_0002050,TcSYL_0002080,TcSYL_0002120,TcSYL_0002160,TcSYL_0002190,TcSYL_0002220,TcSYL_0002290,TcSYL_0002320,TcSYL_0002350,TcSYL_0002380,TcSYL_0002410,TcSYL_0010940,TcSYL_0011060,TcSYL_0011210,TcSYL_0016880,TcSYL_0017040,TcSYL_0017060,TcSYL_0017070,TcSYL_0027700,TcSYL_0031380,TcSYL_0040100,TcSYL_0040160,TcSYL_0040550,TcSYL_0040760,TcSYL_0043070,TcSYL_0044840,TcSYL_0044850,TcSYL_0048010,TcSYL_0…	42.6	1.39	1.74	0.000139770483315	0.00781317001728	0.0781317001728
GO:0051234	establishment of localization	200	85	TcSYL_0002050,TcSYL_0002080,TcSYL_0002120,TcSYL_0002160,TcSYL_0002190,TcSYL_0002220,TcSYL_0002290,TcSYL_0002320,TcSYL_0002350,TcSYL_0002380,TcSYL_0002410,TcSYL_0010940,TcSYL_0011060,TcSYL_0016880,TcSYL_0017040,TcSYL_0017060,TcSYL_0017070,TcSYL_0027700,TcSYL_0031380,TcSYL_0040100,TcSYL_0040160,TcSYL_0040550,TcSYL_0040760,TcSYL_0043070,TcSYL_0044840,TcSYL_0044850,TcSYL_0048010,TcSYL_0063440,TcSYL_0…	42.5	1.38	1.73	0.000193096309156	0.00899506973486	0.107940836818
GO:0006810	transport	200	85	TcSYL_0002050,TcSYL_0002080,TcSYL_0002120,TcSYL_0002160,TcSYL_0002190,TcSYL_0002220,TcSYL_0002290,TcSYL_0002320,TcSYL_0002350,TcSYL_0002380,TcSYL_0002410,TcSYL_0010940,TcSYL_0011060,TcSYL_0016880,TcSYL_0017040,TcSYL_0017060,TcSYL_0017070,TcSYL_0027700,TcSYL_0031380,TcSYL_0040100,TcSYL_0040160,TcSYL_0040550,TcSYL_0040760,TcSYL_0043070,TcSYL_0044840,TcSYL_0044850,TcSYL_0048010,TcSYL_0063440,TcSYL_0…	42.5	1.38	1.73	0.000193096309156	0.00899506973486	0.107940836818
GO:0007155	cell adhesion	145	63	TcSYL_0019200,TcSYL_0020740,TcSYL_0020830,TcSYL_0020840,TcSYL_0021850,TcSYL_0021930,TcSYL_0024190,TcSYL_0024200,TcSYL_0028640,TcSYL_0028650,TcSYL_0028920,TcSYL_0028930,TcSYL_0030880,TcSYL_0030970,TcSYL_0042970,TcSYL_0043050,TcSYL_0044220,TcSYL_0044230,TcSYL_0044270,TcSYL_0044300,TcSYL_0044310,TcSYL_0044350,TcSYL_0044360,TcSYL_0044400,TcSYL_0044410,TcSYL_0044420,TcSYL_0069650,TcSYL_0069660,TcSYL_0…	43.4	1.41	1.78	0.000659431045953	0.0263301396205	0.368621954687
GO:0022610	biological adhesion	145	63	TcSYL_0019200,TcSYL_0020740,TcSYL_0020830,TcSYL_0020840,TcSYL_0021850,TcSYL_0021930,TcSYL_0024190,TcSYL_0024200,TcSYL_0028640,TcSYL_0028650,TcSYL_0028920,TcSYL_0028930,TcSYL_0030880,TcSYL_0030970,TcSYL_0042970,TcSYL_0043050,TcSYL_0044220,TcSYL_0044230,TcSYL_0044270,TcSYL_0044300,TcSYL_0044310,TcSYL_0044350,TcSYL_0044360,TcSYL_0044400,TcSYL_0044410,TcSYL_0044420,TcSYL_0069650,TcSYL_0069660,TcSYL_0…	43.4	1.41	1.78	0.000659431045953	0.0263301396205	0.368621954687
GO:0008152	metabolic process	1336	450	TcSYL_0001070,TcSYL_0001080,TcSYL_0001090,TcSYL_0001100,TcSYL_0003710,TcSYL_0009100,TcSYL_0010190,TcSYL_0010760,TcSYL_0010880,TcSYL_0011090,TcSYL_0011150,TcSYL_0011470,TcSYL_0013050,TcSYL_0013170,TcSYL_0013180,TcSYL_0013480,TcSYL_0013790,TcSYL_0014800,TcSYL_0017140,TcSYL_0017150,TcSYL_0019200,TcSYL_0019730,TcSYL_0020740,TcSYL_0020830,TcSYL_0020840,TcSYL_0021850,TcSYL_0021930,TcSYL_0022690,TcSYL_0…	33.7	1.09	1.27	0.00130343875192	0.0485748174882	0.728622262323
GO:0006811	ion transport	54	27	TcSYL_0027700,TcSYL_0031380,TcSYL_0040160,TcSYL_0043070,TcSYL_0109650,TcSYL_0111290,TcSYL_0111950,TcSYL_0146120,TcSYL_0146130,TcSYL_0159800,TcSYL_0174330,TcSYL_0178120,TcSYL_0180940,TcSYL_0180950,TcSYL_0180960,TcSYL_0180970,TcSYL_0180980,TcSYL_0180990,TcSYL_0181010,TcSYL_0181190,TcSYL_0181210,TcSYL_0181220,TcSYL_0181240,TcSYL_0181260,TcSYL_0181330,TcSYL_0181340,TcSYL_0181420,	50.0	1.62	2.29	0.00224535712222	0.0784471644574	1.0
GO:0030001	metal ion transport	28	16	TcSYL_0146120,TcSYL_0146130,TcSYL_0180940,TcSYL_0180950,TcSYL_0180960,TcSYL_0180970,TcSYL_0180980,TcSYL_0180990,TcSYL_0181010,TcSYL_0181190,TcSYL_0181210,TcSYL_0181220,TcSYL_0181240,TcSYL_0181260,TcSYL_0181330,TcSYL_0181340,	57.1	1.86	3.03	0.00326501442914	0.107361356817	1.0
GO:0006812	cation transport	46	23	TcSYL_0031380,TcSYL_0040160,TcSYL_0043070,TcSYL_0146120,TcSYL_0146130,TcSYL_0159800,TcSYL_0174330,TcSYL_0178120,TcSYL_0180940,TcSYL_0180950,TcSYL_0180960,TcSYL_0180970,TcSYL_0180980,TcSYL_0180990,TcSYL_0181010,TcSYL_0181190,TcSYL_0181210,TcSYL_0181220,TcSYL_0181240,TcSYL_0181260,TcSYL_0181330,TcSYL_0181340,TcSYL_0181420,	50.0	1.62	2.28	0.00467782584033	0.139179467652	1.0
GO:0009187	cyclic nucleotide metabolic process	9	7	TcSYL_0003710,TcSYL_0083140,TcSYL_0083170,TcSYL_0083260,TcSYL_0107750,TcSYL_0107800,TcSYL_0107830,	77.8	2.53	7.92	0.00497958739364	0.139179467652	1.0
GO:0009190	cyclic nucleotide biosynthetic process	9	7	TcSYL_0003710,TcSYL_0083140,TcSYL_0083170,TcSYL_0083260,TcSYL_0107750,TcSYL_0107800,TcSYL_0107830,	77.8	2.53	7.92	0.00497958739364	0.139179467652	1.0
GO:0042493	response to drug	4	4	TcSYL_0017060,TcSYL_0017070,TcSYL_0117190,TcSYL_0117210,	100.0	3.25	inf	0.00893281548013	0.191814000847	1.0
GO:0006855	drug transmembrane transport	4	4	TcSYL_0017060,TcSYL_0017070,TcSYL_0117190,TcSYL_0117210,	100.0	3.25	inf	0.00893281548013	0.191814000847	1.0
GO:0042221	response to chemical	4	4	TcSYL_0017060,TcSYL_0017070,TcSYL_0117190,TcSYL_0117210,	100.0	3.25	inf	0.00893281548013	0.191814000847	1.0
GO:0015893	drug transport	4	4	TcSYL_0017060,TcSYL_0017070,TcSYL_0117190,TcSYL_0117210,	100.0	3.25	inf	0.00893281548013	0.191814000847	1.0
GO:0048285	organelle fission	4	4	TcSYL_0078680,TcSYL_0078700,TcSYL_0117590,TcSYL_0180520,	100.0	3.25	inf	0.00893281548013	0.191814000847	1.0
GO:0007017	microtubule-based process	80	35	TcSYL_0016830,TcSYL_0016990,TcSYL_0023200,TcSYL_0027320,TcSYL_0027330,TcSYL_0043910,TcSYL_0043920,TcSYL_0080530,TcSYL_0084150,TcSYL_0084160,TcSYL_0110880,TcSYL_0112050,TcSYL_0116260,TcSYL_0121990,TcSYL_0123010,TcSYL_0138690,TcSYL_0139300,TcSYL_0140200,TcSYL_0146210,TcSYL_0146220,TcSYL_0146230,TcSYL_0155880,TcSYL_0158420,TcSYL_0158430,TcSYL_0159530,TcSYL_0159740,TcSYL_0159750,TcSYL_0163480,TcSYL_0…	43.8	1.42	1.78	0.0089429511512	0.191814000847	1.0
GO:0006928	movement of cell or subcellular component	72	32	TcSYL_0011210,TcSYL_0016830,TcSYL_0016990,TcSYL_0023200,TcSYL_0027320,TcSYL_0027330,TcSYL_0043910,TcSYL_0043920,TcSYL_0074440,TcSYL_0084150,TcSYL_0084160,TcSYL_0110880,TcSYL_0112050,TcSYL_0123010,TcSYL_0138690,TcSYL_0139300,TcSYL_0140200,TcSYL_0146210,TcSYL_0146220,TcSYL_0146230,TcSYL_0155880,TcSYL_0158420,TcSYL_0158430,TcSYL_0159530,TcSYL_0159740,TcSYL_0159750,TcSYL_0163480,TcSYL_0167050,TcSYL_0…	44.4	1.44	1.83	0.00926471918224	0.191814000847	1.0
GO:0046483	heterocycle metabolic process	234	88	TcSYL_0003710,TcSYL_0010190,TcSYL_0011470,TcSYL_0027280,TcSYL_0027510,TcSYL_0027620,TcSYL_0030620,TcSYL_0030630,TcSYL_0039920,TcSYL_0040030,TcSYL_0043750,TcSYL_0044090,TcSYL_0044110,TcSYL_0044140,TcSYL_0044150,TcSYL_0044650,TcSYL_0044750,TcSYL_0044760,TcSYL_0044770,TcSYL_0046050,TcSYL_0076490,TcSYL_0080490,TcSYL_0083110,TcSYL_0083140,TcSYL_0083170,TcSYL_0083260,TcSYL_0083370,TcSYL_0083390,TcSYL_0…	37.6	1.22	1.39	0.0121740539679	0.228153440789	1.0
GO:0071103	DNA conformation change	10	7	TcSYL_0078680,TcSYL_0078700,TcSYL_0121870,TcSYL_0179140,TcSYL_0180600,TcSYL_0180610,TcSYL_0180620,	70.0	2.27	5.28	0.012202298824	0.228153440789	1.0
GO:0032259	methylation	6	5	TcSYL_0076490,TcSYL_0116130,TcSYL_0172540,TcSYL_0172550,TcSYL_0181390,	83.3	2.71	11.3	0.0122443707043	0.228153440789	1.0
GO:0007018	microtubule-based movement	69	30	TcSYL_0016830,TcSYL_0016990,TcSYL_0023200,TcSYL_0027320,TcSYL_0027330,TcSYL_0043910,TcSYL_0043920,TcSYL_0084150,TcSYL_0084160,TcSYL_0110880,TcSYL_0112050,TcSYL_0123010,TcSYL_0138690,TcSYL_0139300,TcSYL_0140200,TcSYL_0146210,TcSYL_0146220,TcSYL_0146230,TcSYL_0155880,TcSYL_0158420,TcSYL_0158430,TcSYL_0159530,TcSYL_0159740,TcSYL_0159750,TcSYL_0163480,TcSYL_0167050,TcSYL_0167480,TcSYL_0173270,TcSYL_0…	43.5	1.41	1.75	0.0164762412747	0.297103834599	1.0
GO:0034641	cellular nitrogen compound metabolic process	378	134	TcSYL_0003710,TcSYL_0009100,TcSYL_0010190,TcSYL_0010760,TcSYL_0011150,TcSYL_0011470,TcSYL_0017140,TcSYL_0017150,TcSYL_0027270,TcSYL_0027280,TcSYL_0027510,TcSYL_0027570,TcSYL_0027620,TcSYL_0030620,TcSYL_0030630,TcSYL_0039920,TcSYL_0040030,TcSYL_0043020,TcSYL_0043730,TcSYL_0043750,TcSYL_0044090,TcSYL_0044110,TcSYL_0044140,TcSYL_0044150,TcSYL_0044650,TcSYL_0044750,TcSYL_0044760,TcSYL_0044770,TcSYL_0…	35.4	1.15	1.27	0.0214284073246	0.341370075831	1.0
GO:0006139	nucleobase-containing compound metabolic process	225	83	TcSYL_0003710,TcSYL_0010190,TcSYL_0011470,TcSYL_0027280,TcSYL_0027510,TcSYL_0027620,TcSYL_0030620,TcSYL_0030630,TcSYL_0039920,TcSYL_0040030,TcSYL_0043750,TcSYL_0044090,TcSYL_0044110,TcSYL_0044140,TcSYL_0044150,TcSYL_0044650,TcSYL_0044750,TcSYL_0044760,TcSYL_0044770,TcSYL_0046050,TcSYL_0076490,TcSYL_0080490,TcSYL_0083110,TcSYL_0083140,TcSYL_0083170,TcSYL_0083260,TcSYL_0083370,TcSYL_0083390,TcSYL_0…	36.9	1.2	1.34	0.0246195352939	0.341370075831	1.0
GO:0008295	spermidine biosynthetic process	3	3	TcSYL_0140350,TcSYL_0140360,TcSYL_0140370,	100.0	3.25	inf	0.0290881871173	0.341370075831	1.0
GO:0009308	amine metabolic process	3	3	TcSYL_0140350,TcSYL_0140360,TcSYL_0140370,	100.0	3.25	inf	0.0290881871173	0.341370075831	1.0
GO:0044106	cellular amine metabolic process	3	3	TcSYL_0140350,TcSYL_0140360,TcSYL_0140370,	100.0	3.25	inf	0.0290881871173	0.341370075831	1.0
GO:0006750	glutathione biosynthetic process	3	3	TcSYL_0017140,TcSYL_0017150,TcSYL_0027270,	100.0	3.25	inf	0.0290881871173	0.341370075831	1.0
GO:0006595	polyamine metabolic process	3	3	TcSYL_0140350,TcSYL_0140360,TcSYL_0140370,	100.0	3.25	inf	0.0290881871173	0.341370075831	1.0
GO:0019184	nonribosomal peptide biosynthetic process	3	3	TcSYL_0017140,TcSYL_0017150,TcSYL_0027270,	100.0	3.25	inf	0.0290881871173	0.341370075831	1.0
GO:0008216	spermidine metabolic process	3	3	TcSYL_0140350,TcSYL_0140360,TcSYL_0140370,	100.0	3.25	inf	0.0290881871173	0.341370075831	1.0
GO:0009309	amine biosynthetic process	3	3	TcSYL_0140350,TcSYL_0140360,TcSYL_0140370,	100.0	3.25	inf	0.0290881871173	0.341370075831	1.0
GO:0042401	cellular biogenic amine biosynthetic process	3	3	TcSYL_0140350,TcSYL_0140360,TcSYL_0140370,	100.0	3.25	inf	0.0290881871173	0.341370075831	1.0
GO:0097164	ammonium ion metabolic process	3	3	TcSYL_0140350,TcSYL_0140360,TcSYL_0140370,	100.0	3.25	inf	0.0290881871173	0.341370075831	1.0
GO:0044262	cellular carbohydrate metabolic process	3	3	TcSYL_0013480,TcSYL_0116750,TcSYL_0116760,	100.0	3.25	inf	0.0290881871173	0.341370075831	1.0
GO:0007049	cell cycle	3	3	TcSYL_0078680,TcSYL_0078700,TcSYL_0112190,	100.0	3.25	inf	0.0290881871173	0.341370075831	1.0
GO:0006596	polyamine biosynthetic process	3	3	TcSYL_0140350,TcSYL_0140360,TcSYL_0140370,	100.0	3.25	inf	0.0290881871173	0.341370075831	1.0
GO:0006576	cellular biogenic amine metabolic process	3	3	TcSYL_0140350,TcSYL_0140360,TcSYL_0140370,	100.0	3.25	inf	0.0290881871173	0.341370075831	1.0
GO:0051186	cofactor metabolic process	31	15	TcSYL_0001070,TcSYL_0010190,TcSYL_0017140,TcSYL_0017150,TcSYL_0022690,TcSYL_0027270,TcSYL_0083390,TcSYL_0111190,TcSYL_0111200,TcSYL_0111210,TcSYL_0116560,TcSYL_0140470,TcSYL_0182270,TcSYL_0182330,TcSYL_0182350,	48.4	1.57	2.13	0.0293126362073	0.341370075831	1.0
GO:0090304	nucleic acid metabolic process	168	63	TcSYL_0011470,TcSYL_0027280,TcSYL_0027510,TcSYL_0027620,TcSYL_0030620,TcSYL_0030630,TcSYL_0039920,TcSYL_0040030,TcSYL_0043750,TcSYL_0044090,TcSYL_0044110,TcSYL_0044140,TcSYL_0044150,TcSYL_0044650,TcSYL_0044750,TcSYL_0044760,TcSYL_0044770,TcSYL_0046050,TcSYL_0076490,TcSYL_0080490,TcSYL_0083110,TcSYL_0083370,TcSYL_0105430,TcSYL_0110780,TcSYL_0111310,TcSYL_0111320,TcSYL_0111330,TcSYL_0111970,TcSYL_0…	37.5	1.22	1.37	0.033273457329	0.37958903361	1.0
GO:0044260	cellular macromolecule metabolic process	439	151	TcSYL_0001090,TcSYL_0009100,TcSYL_0010760,TcSYL_0010880,TcSYL_0011150,TcSYL_0011470,TcSYL_0013790,TcSYL_0027200,TcSYL_0027280,TcSYL_0027570,TcSYL_0027620,TcSYL_0027650,TcSYL_0030620,TcSYL_0030630,TcSYL_0030940,TcSYL_0031770,TcSYL_0032040,TcSYL_0040030,TcSYL_0040930,TcSYL_0043020,TcSYL_0043650,TcSYL_0043730,TcSYL_0043750,TcSYL_0044040,TcSYL_0044090,TcSYL_0044110,TcSYL_0044140,TcSYL_0044150,TcSYL_0…	34.4	1.12	1.21	0.0437350070362	0.456122560012	1.0
GO:0035556	intracellular signal transduction	12	7	TcSYL_0003710,TcSYL_0083140,TcSYL_0083170,TcSYL_0083260,TcSYL_0107750,TcSYL_0107800,TcSYL_0107830,	58.3	1.9	3.16	0.0438277964137	0.456122560012	1.0
GO:0006259	DNA metabolic process	60	25	TcSYL_0011470,TcSYL_0027280,TcSYL_0043750,TcSYL_0044110,TcSYL_0044140,TcSYL_0044150,TcSYL_0044750,TcSYL_0044760,TcSYL_0044770,TcSYL_0105430,TcSYL_0117310,TcSYL_0121870,TcSYL_0139160,TcSYL_0145220,TcSYL_0146340,TcSYL_0155940,TcSYL_0171470,TcSYL_0171480,TcSYL_0174660,TcSYL_0179140,TcSYL_0180040,TcSYL_0180600,TcSYL_0180610,TcSYL_0180620,TcSYL_0181360,	41.7	1.35	1.62	0.0466960466834	0.456122560012	1.0
GO:0051716	cellular response to stimulus	60	25	TcSYL_0003710,TcSYL_0011470,TcSYL_0040040,TcSYL_0040060,TcSYL_0040400,TcSYL_0043750,TcSYL_0044750,TcSYL_0044760,TcSYL_0044770,TcSYL_0083140,TcSYL_0083170,TcSYL_0083260,TcSYL_0105430,TcSYL_0107750,TcSYL_0107800,TcSYL_0107830,TcSYL_0117310,TcSYL_0146340,TcSYL_0157370,TcSYL_0157410,TcSYL_0171470,TcSYL_0171480,TcSYL_0174660,TcSYL_0180040,TcSYL_0188780,	41.7	1.35	1.62	0.0466960466834	0.456122560012	1.0
