# Supplementary material for: Microevolution of Trypanosoma cruzi reveals hybridization and clonal mechanisms driving rapid genome diversification
Source: eLife. 2022 May 10;11:e75237. doi: 10.7554/eLife.75237 (PMC9098224; doi:10.7554/eLife.75237)
Supplement: Supplementary file 9. — Bgd count: Number of genes with this term in the genome; Result count: Number of genes with this term in our analysis; Pct of bgd: The percent of genes with this term in our analysis divided by the percent of genes with this term in the genome; Fold enrichment: Of the genes in the genome with this term, the percent that are present in your analysis. [file elife-75237-supp9.xlsx]

## Sheet: Table 10 - GO gene contraction 
ID	Name	Bgd count	Result count	Result gene list	Pct of bgd	Fold enrichment	Odds ratio	P-value	Benjamini	Bonferroni
GO:0006508	proteolysis	295	144	TcSYL_0013170,TcSYL_0013180,TcSYL_0014690,TcSYL_0021850,TcSYL_0021930,TcSYL_0023730,TcSYL_0028920,TcSYL_0028930,TcSYL_0050810,TcSYL_0051870,TcSYL_0060670,TcSYL_0060780,TcSYL_0062230,TcSYL_0063550,TcSYL_0065050,TcSYL_0065070,TcSYL_0066100,TcSYL_0068660,TcSYL_0069650,TcSYL_0069660,TcSYL_0070510,TcSYL_0071040,TcSYL_0071830,TcSYL_0071840,TcSYL_0074310,TcSYL_0076860,TcSYL_0077090,TcSYL_0077120,TcSYL_0…	48.8	1.81	2.91	2.48437625155e-17	8.96859826809e-15	8.96859826809e-15
GO:0019538	protein metabolic process	619	210	TcSYL_0000180,TcSYL_0001610,TcSYL_0001620,TcSYL_0001840,TcSYL_0013170,TcSYL_0013180,TcSYL_0014690,TcSYL_0021850,TcSYL_0021930,TcSYL_0023730,TcSYL_0028920,TcSYL_0028930,TcSYL_0032040,TcSYL_0032580,TcSYL_0048680,TcSYL_0050090,TcSYL_0050810,TcSYL_0051870,TcSYL_0057230,TcSYL_0057310,TcSYL_0057510,TcSYL_0057760,TcSYL_0058600,TcSYL_0060670,TcSYL_0060780,TcSYL_0062080,TcSYL_0062230,TcSYL_0063550,TcSYL_0…	33.9	1.26	1.52	1.08104063062e-05	0.00195127833827	0.00390255667654
GO:1901564	organonitrogen compound metabolic process	705	234	TcSYL_0000180,TcSYL_0001610,TcSYL_0001620,TcSYL_0001840,TcSYL_0013170,TcSYL_0013180,TcSYL_0014180,TcSYL_0014690,TcSYL_0021850,TcSYL_0021930,TcSYL_0023730,TcSYL_0028920,TcSYL_0028930,TcSYL_0032040,TcSYL_0032580,TcSYL_0048680,TcSYL_0050090,TcSYL_0050810,TcSYL_0051870,TcSYL_0057230,TcSYL_0057310,TcSYL_0057510,TcSYL_0057760,TcSYL_0058600,TcSYL_0058930,TcSYL_0060670,TcSYL_0060780,TcSYL_0062080,TcSYL_0…	33.2	1.23	1.48	1.74233783913e-05	0.00209661319975	0.00628983959924
GO:0140029	exocytic process	20	13	TcSYL_0066050,TcSYL_0066060,TcSYL_0091630,TcSYL_0091660,TcSYL_0091880,TcSYL_0091890,TcSYL_0115060,TcSYL_0156210,TcSYL_0156260,TcSYL_0156280,TcSYL_0156370,TcSYL_0156390,TcSYL_0156470,	65.0	2.41	5.1	0.000396887418792	0.0236729433167	0.143276358184
GO:0006904	vesicle docking involved in exocytosis	20	13	TcSYL_0066050,TcSYL_0066060,TcSYL_0091630,TcSYL_0091660,TcSYL_0091880,TcSYL_0091890,TcSYL_0115060,TcSYL_0156210,TcSYL_0156260,TcSYL_0156280,TcSYL_0156370,TcSYL_0156390,TcSYL_0156470,	65.0	2.41	5.1	0.000396887418792	0.0236729433167	0.143276358184
GO:0006887	exocytosis	23	14	TcSYL_0066050,TcSYL_0066060,TcSYL_0091630,TcSYL_0091660,TcSYL_0091880,TcSYL_0091890,TcSYL_0115060,TcSYL_0137850,TcSYL_0156210,TcSYL_0156260,TcSYL_0156280,TcSYL_0156370,TcSYL_0156390,TcSYL_0156470,	60.9	2.26	4.27	0.000626858592455	0.0236729433167	0.226295951876
GO:0032940	secretion by cell	23	14	TcSYL_0066050,TcSYL_0066060,TcSYL_0091630,TcSYL_0091660,TcSYL_0091880,TcSYL_0091890,TcSYL_0115060,TcSYL_0137850,TcSYL_0156210,TcSYL_0156260,TcSYL_0156280,TcSYL_0156370,TcSYL_0156390,TcSYL_0156470,	60.9	2.26	4.27	0.000626858592455	0.0236729433167	0.226295951876
GO:0046903	secretion	23	14	TcSYL_0066050,TcSYL_0066060,TcSYL_0091630,TcSYL_0091660,TcSYL_0091880,TcSYL_0091890,TcSYL_0115060,TcSYL_0137850,TcSYL_0156210,TcSYL_0156260,TcSYL_0156280,TcSYL_0156370,TcSYL_0156390,TcSYL_0156470,	60.9	2.26	4.27	0.000626858592455	0.0236729433167	0.226295951876
GO:0140056	organelle localization by membrane tethering	21	13	TcSYL_0066050,TcSYL_0066060,TcSYL_0091630,TcSYL_0091660,TcSYL_0091880,TcSYL_0091890,TcSYL_0115060,TcSYL_0156210,TcSYL_0156260,TcSYL_0156280,TcSYL_0156370,TcSYL_0156390,TcSYL_0156470,	61.9	2.3	4.46	0.000786912243214	0.0236729433167	0.2840753198
GO:0051640	organelle localization	21	13	TcSYL_0066050,TcSYL_0066060,TcSYL_0091630,TcSYL_0091660,TcSYL_0091880,TcSYL_0091890,TcSYL_0115060,TcSYL_0156210,TcSYL_0156260,TcSYL_0156280,TcSYL_0156370,TcSYL_0156390,TcSYL_0156470,	61.9	2.3	4.46	0.000786912243214	0.0236729433167	0.2840753198
GO:0048278	vesicle docking	21	13	TcSYL_0066050,TcSYL_0066060,TcSYL_0091630,TcSYL_0091660,TcSYL_0091880,TcSYL_0091890,TcSYL_0115060,TcSYL_0156210,TcSYL_0156260,TcSYL_0156280,TcSYL_0156370,TcSYL_0156390,TcSYL_0156470,	61.9	2.3	4.46	0.000786912243214	0.0236729433167	0.2840753198
GO:0022406	membrane docking	21	13	TcSYL_0066050,TcSYL_0066060,TcSYL_0091630,TcSYL_0091660,TcSYL_0091880,TcSYL_0091890,TcSYL_0115060,TcSYL_0156210,TcSYL_0156260,TcSYL_0156280,TcSYL_0156370,TcSYL_0156390,TcSYL_0156470,	61.9	2.3	4.46	0.000786912243214	0.0236729433167	0.2840753198
GO:0009072	aromatic amino acid family metabolic process	12	8	TcSYL_0130970,TcSYL_0167910,TcSYL_0168130,TcSYL_0168160,TcSYL_0168190,TcSYL_0168310,TcSYL_0168550,TcSYL_0168590,	66.7	2.47	5.46	0.00457505872562	0.127045861535	1.0
GO:0006520	cellular amino acid metabolic process	67	28	TcSYL_0014180,TcSYL_0058930,TcSYL_0064150,TcSYL_0064450,TcSYL_0065010,TcSYL_0074000,TcSYL_0082950,TcSYL_0082960,TcSYL_0130970,TcSYL_0167150,TcSYL_0167330,TcSYL_0167350,TcSYL_0167700,TcSYL_0167740,TcSYL_0167870,TcSYL_0167910,TcSYL_0168000,TcSYL_0168130,TcSYL_0168160,TcSYL_0168190,TcSYL_0168310,TcSYL_0168480,TcSYL_0168520,TcSYL_0168550,TcSYL_0168590,TcSYL_0168790,TcSYL_0201810,TcSYL_0203270,	41.8	1.55	1.98	0.00561147121151	0.144695793382	1.0
GO:0042026	protein refolding	8	6	TcSYL_0011280,TcSYL_0011360,TcSYL_0011390,TcSYL_0011400,TcSYL_0011410,TcSYL_0011440,	75.0	2.78	8.18	0.00630187720945	0.151665178174	1.0
GO:0043170	macromolecule metabolic process	754	227	TcSYL_0000180,TcSYL_0001610,TcSYL_0001620,TcSYL_0001840,TcSYL_0013170,TcSYL_0013180,TcSYL_0014690,TcSYL_0021850,TcSYL_0021930,TcSYL_0023730,TcSYL_0028920,TcSYL_0028930,TcSYL_0030620,TcSYL_0032040,TcSYL_0032580,TcSYL_0034060,TcSYL_0034070,TcSYL_0048680,TcSYL_0050090,TcSYL_0050170,TcSYL_0050810,TcSYL_0051870,TcSYL_0052750,TcSYL_0057230,TcSYL_0057310,TcSYL_0057510,TcSYL_0057760,TcSYL_0058600,TcSYL_0…	30.1	1.12	1.23	0.0146181619839	0.329822279762	1.0
GO:0006807	nitrogen compound metabolic process	859	252	TcSYL_0000180,TcSYL_0001610,TcSYL_0001620,TcSYL_0001840,TcSYL_0003710,TcSYL_0013170,TcSYL_0013180,TcSYL_0014180,TcSYL_0014690,TcSYL_0021850,TcSYL_0021930,TcSYL_0023730,TcSYL_0028920,TcSYL_0028930,TcSYL_0030620,TcSYL_0032040,TcSYL_0032580,TcSYL_0034060,TcSYL_0034070,TcSYL_0048680,TcSYL_0050090,TcSYL_0050170,TcSYL_0050810,TcSYL_0051870,TcSYL_0052750,TcSYL_0057230,TcSYL_0057310,TcSYL_0057510,TcSYL_0…	29.3	1.09	1.18	0.0361606938253	0.689787857739	1.0
GO:0044238	primary metabolic process	919	268	TcSYL_0000180,TcSYL_0001610,TcSYL_0001620,TcSYL_0001840,TcSYL_0003710,TcSYL_0013170,TcSYL_0013180,TcSYL_0013480,TcSYL_0014180,TcSYL_0014690,TcSYL_0021850,TcSYL_0021930,TcSYL_0023730,TcSYL_0028920,TcSYL_0028930,TcSYL_0030620,TcSYL_0032040,TcSYL_0032580,TcSYL_0034060,TcSYL_0034070,TcSYL_0048680,TcSYL_0050090,TcSYL_0050170,TcSYL_0050810,TcSYL_0051870,TcSYL_0052750,TcSYL_0057230,TcSYL_0057280,TcSYL_0…	29.2	1.08	1.17	0.040335394882	0.689787857739	1.0
