# Supplementary material for: Microevolution of Trypanosoma cruzi reveals hybridization and clonal mechanisms driving rapid genome diversification
Source: eLife. 2022 May 10;11:e75237. doi: 10.7554/eLife.75237 (PMC9098224; doi:10.7554/eLife.75237)
Supplement: Supplementary file 10. — Bgd count: Number of genes with this term in the genome; Result count: Number of genes with this term in our analysis; Pct of bgd: The percent of genes with this term in our analysis divided by the percent of genes with this term in the genome; Fold enrichment: Of the genes in the genome with this term, the percent that are present in your analysis. [file elife-75237-supp10.xlsx]

## Sheet: Table 11 - GO chromosome 19
ID	Name	Bgd count	Result count	Result gene list	Pct of bgd	Fold enrichment	Odds ratio	P-value	Benjamini	Bonferroni
GO:0019400	alditol metabolic process	2	2	TcSYL_0116750,TcSYL_0116760,	100.0	41.17	inf	0.000582209197518	0.0393069399593	0.0879135888253
GO:0006071	glycerol metabolic process	2	2	TcSYL_0116750,TcSYL_0116760,	100.0	41.17	inf	0.000582209197518	0.0393069399593	0.0879135888253
GO:0010467	gene expression	240	14	TcSYL_0115140,TcSYL_0115180,TcSYL_0115200,TcSYL_0115270,TcSYL_0115280,TcSYL_0115290,TcSYL_0115310,TcSYL_0115320,TcSYL_0115330,TcSYL_0115410,TcSYL_0116050,TcSYL_0116380,TcSYL_0116390,TcSYL_0116700,	5.8	2.4	2.83	0.00152626314004	0.0393069399593	0.230465734146
GO:0044262	cellular carbohydrate metabolic process	3	2	TcSYL_0116750,TcSYL_0116760,	66.7	27.45	82.52	0.00171908302263	0.0393069399593	0.259581536417
GO:0006412	translation	167	11	TcSYL_0115140,TcSYL_0115180,TcSYL_0115270,TcSYL_0115280,TcSYL_0115290,TcSYL_0115310,TcSYL_0115320,TcSYL_0115330,TcSYL_0115410,TcSYL_0116380,TcSYL_0116390,	6.6	2.71	3.15	0.00198055563378	0.0393069399593	0.299063900701
GO:0043043	peptide biosynthetic process	170	11	TcSYL_0115140,TcSYL_0115180,TcSYL_0115270,TcSYL_0115280,TcSYL_0115290,TcSYL_0115310,TcSYL_0115320,TcSYL_0115330,TcSYL_0115410,TcSYL_0116380,TcSYL_0116390,	6.5	2.66	3.09	0.00228514760251	0.0393069399593	0.345057287979
GO:0043604	amide biosynthetic process	170	11	TcSYL_0115140,TcSYL_0115180,TcSYL_0115270,TcSYL_0115280,TcSYL_0115290,TcSYL_0115310,TcSYL_0115320,TcSYL_0115330,TcSYL_0115410,TcSYL_0116380,TcSYL_0116390,	6.5	2.66	3.09	0.00228514760251	0.0393069399593	0.345057287979
GO:0006518	peptide metabolic process	173	11	TcSYL_0115140,TcSYL_0115180,TcSYL_0115270,TcSYL_0115280,TcSYL_0115290,TcSYL_0115310,TcSYL_0115320,TcSYL_0115330,TcSYL_0115410,TcSYL_0116380,TcSYL_0116390,	6.4	2.62	3.02	0.00262697167546	0.0393069399593	0.396672722995
GO:0043603	cellular amide metabolic process	173	11	TcSYL_0115140,TcSYL_0115180,TcSYL_0115270,TcSYL_0115280,TcSYL_0115290,TcSYL_0115310,TcSYL_0115320,TcSYL_0115330,TcSYL_0115410,TcSYL_0116380,TcSYL_0116390,	6.4	2.62	3.02	0.00262697167546	0.0393069399593	0.396672722995
GO:0042221	response to chemical	4	2	TcSYL_0117190,TcSYL_0117210,	50.0	20.59	41.25	0.00338404118855	0.0393069399593	0.51099021947
GO:0015893	drug transport	4	2	TcSYL_0117190,TcSYL_0117210,	50.0	20.59	41.25	0.00338404118855	0.0393069399593	0.51099021947
GO:0042493	response to drug	4	2	TcSYL_0117190,TcSYL_0117210,	50.0	20.59	41.25	0.00338404118855	0.0393069399593	0.51099021947
GO:0006855	drug transmembrane transport	4	2	TcSYL_0117190,TcSYL_0117210,	50.0	20.59	41.25	0.00338404118855	0.0393069399593	0.51099021947
GO:1901566	organonitrogen compound biosynthetic process	211	12	TcSYL_0115140,TcSYL_0115180,TcSYL_0115270,TcSYL_0115280,TcSYL_0115290,TcSYL_0115310,TcSYL_0115320,TcSYL_0115330,TcSYL_0115410,TcSYL_0116280,TcSYL_0116380,TcSYL_0116390,	5.7	2.34	2.69	0.00423748313481	0.0457042823825	0.639859953356
GO:0044271	cellular nitrogen compound biosynthetic process	241	13	TcSYL_0115140,TcSYL_0115180,TcSYL_0115270,TcSYL_0115280,TcSYL_0115290,TcSYL_0115310,TcSYL_0115320,TcSYL_0115330,TcSYL_0115410,TcSYL_0116050,TcSYL_0116280,TcSYL_0116380,TcSYL_0116390,	5.4	2.22	2.56	0.00457251470769	0.0460299813907	0.690449720861
GO:0034641	cellular nitrogen compound metabolic process	362	17	TcSYL_0115140,TcSYL_0115180,TcSYL_0115200,TcSYL_0115270,TcSYL_0115280,TcSYL_0115290,TcSYL_0115310,TcSYL_0115320,TcSYL_0115330,TcSYL_0115410,TcSYL_0116050,TcSYL_0116180,TcSYL_0116280,TcSYL_0116380,TcSYL_0116390,TcSYL_0116700,TcSYL_0117310,	4.7	1.93	2.27	0.00488229717539	0.0460766795928	0.737226873484
GO:0019751	polyol metabolic process	5	2	TcSYL_0116750,TcSYL_0116760,	40.0	16.47	27.49	0.00555143809194	0.0493098324637	0.838267151884
GO:0009059	macromolecule biosynthetic process	226	12	TcSYL_0115140,TcSYL_0115180,TcSYL_0115270,TcSYL_0115280,TcSYL_0115290,TcSYL_0115310,TcSYL_0115320,TcSYL_0115330,TcSYL_0115410,TcSYL_0116050,TcSYL_0116380,TcSYL_0116390,	5.3	2.19	2.49	0.00735153451082	0.0584253532175	1.0
GO:0034645	cellular macromolecule biosynthetic process	226	12	TcSYL_0115140,TcSYL_0115180,TcSYL_0115270,TcSYL_0115280,TcSYL_0115290,TcSYL_0115310,TcSYL_0115320,TcSYL_0115330,TcSYL_0115410,TcSYL_0116050,TcSYL_0116380,TcSYL_0116390,	5.3	2.19	2.49	0.00735153451082	0.0584253532175	1.0
GO:0044267	cellular protein metabolic process	350	16	TcSYL_0115140,TcSYL_0115180,TcSYL_0115270,TcSYL_0115280,TcSYL_0115290,TcSYL_0115310,TcSYL_0115320,TcSYL_0115330,TcSYL_0115390,TcSYL_0115410,TcSYL_0115530,TcSYL_0116050,TcSYL_0116090,TcSYL_0116380,TcSYL_0116390,TcSYL_0117350,	4.6	1.88	2.18	0.00831400589094	0.0627707444766	1.0
GO:0006066	alcohol metabolic process	7	2	TcSYL_0116750,TcSYL_0116760,	28.6	11.76	16.48	0.011295467375	0.080844302809	1.0
GO:0044237	cellular metabolic process	632	24	TcSYL_0115140,TcSYL_0115180,TcSYL_0115200,TcSYL_0115270,TcSYL_0115280,TcSYL_0115290,TcSYL_0115310,TcSYL_0115320,TcSYL_0115330,TcSYL_0115390,TcSYL_0115410,TcSYL_0115530,TcSYL_0116050,TcSYL_0116090,TcSYL_0116180,TcSYL_0116280,TcSYL_0116380,TcSYL_0116390,TcSYL_0116560,TcSYL_0116700,TcSYL_0116750,TcSYL_0116760,TcSYL_0117310,TcSYL_0117350,	3.8	1.56	1.86	0.0117786401444	0.080844302809	1.0
GO:1901615	organic hydroxy compound metabolic process	8	2	TcSYL_0116750,TcSYL_0116760,	25.0	10.29	13.73	0.0148252271944	0.0814982728841	1.0
GO:0071840	cellular component organization or biogenesis	62	5	TcSYL_0115200,TcSYL_0115250,TcSYL_0116050,TcSYL_0117100,TcSYL_0117590,	8.1	3.32	3.7	0.0162821558331	0.0814982728841	1.0
GO:0044249	cellular biosynthetic process	288	13	TcSYL_0115140,TcSYL_0115180,TcSYL_0115270,TcSYL_0115280,TcSYL_0115290,TcSYL_0115310,TcSYL_0115320,TcSYL_0115330,TcSYL_0115410,TcSYL_0116050,TcSYL_0116280,TcSYL_0116380,TcSYL_0116390,	4.5	1.86	2.09	0.019424586842	0.0814982728841	1.0
GO:0042727	flavin-containing compound biosynthetic process	1	1	TcSYL_0116280,	100.0	41.17	inf	0.0242875647668	0.0814982728841	1.0
GO:0042726	flavin-containing compound metabolic process	1	1	TcSYL_0116280,	100.0	41.17	inf	0.0242875647668	0.0814982728841	1.0
GO:0042364	water-soluble vitamin biosynthetic process	1	1	TcSYL_0116280,	100.0	41.17	inf	0.0242875647668	0.0814982728841	1.0
GO:0042274	ribosomal small subunit biogenesis	1	1	TcSYL_0115200,	100.0	41.17	inf	0.0242875647668	0.0814982728841	1.0
GO:0042127	regulation of cell population proliferation	1	1	TcSYL_0115580,	100.0	41.17	inf	0.0242875647668	0.0814982728841	1.0
GO:0000462	maturation of SSU-rRNA from tricistronic rRNA transcript (SSU-rRNA, 5.8S rRNA, LSU-rRNA)	1	1	TcSYL_0115200,	100.0	41.17	inf	0.0242875647668	0.0814982728841	1.0
GO:0006740	NADPH regeneration	1	1	TcSYL_0116560,	100.0	41.17	inf	0.0242875647668	0.0814982728841	1.0
GO:0009231	riboflavin biosynthetic process	1	1	TcSYL_0116280,	100.0	41.17	inf	0.0242875647668	0.0814982728841	1.0
GO:0009110	vitamin biosynthetic process	1	1	TcSYL_0116280,	100.0	41.17	inf	0.0242875647668	0.0814982728841	1.0
GO:0008284	positive regulation of cell population proliferation	1	1	TcSYL_0115580,	100.0	41.17	inf	0.0242875647668	0.0814982728841	1.0
GO:0006098	pentose-phosphate shunt	1	1	TcSYL_0116560,	100.0	41.17	inf	0.0242875647668	0.0814982728841	1.0
GO:0006952	defense response	1	1	TcSYL_0115580,	100.0	41.17	inf	0.0242875647668	0.0814982728841	1.0
GO:0006771	riboflavin metabolic process	1	1	TcSYL_0116280,	100.0	41.17	inf	0.0242875647668	0.0814982728841	1.0
GO:0006767	water-soluble vitamin metabolic process	1	1	TcSYL_0116280,	100.0	41.17	inf	0.0242875647668	0.0814982728841	1.0
GO:0006766	vitamin metabolic process	1	1	TcSYL_0116280,	100.0	41.17	inf	0.0242875647668	0.0814982728841	1.0
GO:0030490	maturation of SSU-rRNA	1	1	TcSYL_0115200,	100.0	41.17	inf	0.0242875647668	0.0814982728841	1.0
GO:0006739	NADP metabolic process	1	1	TcSYL_0116560,	100.0	41.17	inf	0.0242875647668	0.0814982728841	1.0
GO:0006354	DNA-templated transcription, elongation	1	1	TcSYL_0116050,	100.0	41.17	inf	0.0242875647668	0.0814982728841	1.0
GO:0006368	transcription elongation from RNA polymerase II promoter	1	1	TcSYL_0116050,	100.0	41.17	inf	0.0242875647668	0.0814982728841	1.0
GO:0006366	transcription by RNA polymerase II	1	1	TcSYL_0116050,	100.0	41.17	inf	0.0242875647668	0.0814982728841	1.0
GO:0016043	cellular component organization	47	4	TcSYL_0115250,TcSYL_0116050,TcSYL_0117100,TcSYL_0117590,	8.5	3.5	3.89	0.0260279864506	0.0854396946529	1.0
GO:0044260	cellular macromolecule metabolic process	439	17	TcSYL_0115140,TcSYL_0115180,TcSYL_0115270,TcSYL_0115280,TcSYL_0115290,TcSYL_0115310,TcSYL_0115320,TcSYL_0115330,TcSYL_0115390,TcSYL_0115410,TcSYL_0115530,TcSYL_0116050,TcSYL_0116090,TcSYL_0116380,TcSYL_0116390,TcSYL_0117310,TcSYL_0117350,	3.9	1.59	1.8	0.0306920098419	0.0986062443856	1.0
GO:1901576	organic substance biosynthetic process	315	13	TcSYL_0115140,TcSYL_0115180,TcSYL_0115270,TcSYL_0115280,TcSYL_0115290,TcSYL_0115310,TcSYL_0115320,TcSYL_0115330,TcSYL_0115410,TcSYL_0116050,TcSYL_0116280,TcSYL_0116380,TcSYL_0116390,	4.1	1.7	1.88	0.0374538738906	0.117823644947	1.0
GO:0006370	7-methylguanosine mRNA capping	2	1	TcSYL_0116700,	50.0	20.59	40.7	0.0479929203358	0.139364057129	1.0
GO:0007031	peroxisome organization	2	1	TcSYL_0117590,	50.0	20.59	40.7	0.0479929203358	0.139364057129	1.0
GO:0051156	glucose 6-phosphate metabolic process	2	1	TcSYL_0116560,	50.0	20.59	40.7	0.0479929203358	0.139364057129	1.0
GO:0016559	peroxisome fission	2	1	TcSYL_0117590,	50.0	20.59	40.7	0.0479929203358	0.139364057129	1.0
