# Supplementary material for: Microevolution of Trypanosoma cruzi reveals hybridization and clonal mechanisms driving rapid genome diversification
Source: eLife. 2022 May 10;11:e75237. doi: 10.7554/eLife.75237 (PMC9098224; doi:10.7554/eLife.75237)
Supplement: Supplementary file 11. — Bgd count: Number of genes with this term in the genome; Result count: Number of genes with this term in our analysis; Pct of bgd: The percent of genes with this term in our analysis divided by the percent of genes with this term in the genome; Fold enrichment: Of the genes in the genome with this term, the percent that are present in your analysis. [file elife-75237-supp11.xlsx]

## Sheet: Table 12 - GO chromosom 37
ID	Name	Bgd count	Result count	Result gene list	Pct of bgd	Fold enrichment	Odds ratio	P-value	Benjamini	Bonferroni
GO:0032259	methylation	6	2	TcSYL_0172540,TcSYL_0172550,	33.3	22.87	35.34	0.0030015997892	0.171557268884	0.249132782503
GO:0006298	mismatch repair	10	2	TcSYL_0171470,TcSYL_0171480,	20.0	13.72	17.65	0.00867651980078	0.171557268884	0.720151143465
GO:0006281	DNA repair	32	3	TcSYL_0171470,TcSYL_0171480,TcSYL_0174660,	9.4	6.43	7.42	0.0106798371557	0.171557268884	0.88642648392
GO:0000375	RNA splicing, via transesterification reactions	1	1	TcSYL_0173530,	100.0	68.62	inf	0.0145725388601	0.171557268884	1.0
GO:0000377	RNA splicing, via transesterification reactions with bulged adenosine as nucleophile	1	1	TcSYL_0173530,	100.0	68.62	inf	0.0145725388601	0.171557268884	1.0
GO:0000398	mRNA splicing, via spliceosome	1	1	TcSYL_0173530,	100.0	68.62	inf	0.0145725388601	0.171557268884	1.0
GO:0055114	obsolete oxidation-reduction process	188	7	TcSYL_0171680,TcSYL_0171740,TcSYL_0171750,TcSYL_0172050,TcSYL_0172060,TcSYL_0174260,TcSYL_0174840,	3.7	2.56	2.91	0.0174853784949	0.171557268884	1.0
GO:0006974	cellular response to DNA damage stimulus	40	3	TcSYL_0171470,TcSYL_0171480,TcSYL_0174660,	7.5	5.15	5.8	0.0196212003463	0.171557268884	1.0
GO:0033554	cellular response to stress	40	3	TcSYL_0171470,TcSYL_0171480,TcSYL_0174660,	7.5	5.15	5.8	0.0196212003463	0.171557268884	1.0
GO:0006099	tricarboxylic acid cycle	2	1	TcSYL_0174840,	50.0	34.31	69.14	0.0289373706551	0.171557268884	1.0
GO:0008380	RNA splicing	2	1	TcSYL_0173530,	50.0	34.31	69.14	0.0289373706551	0.171557268884	1.0
GO:0009060	aerobic respiration	2	1	TcSYL_0174840,	50.0	34.31	69.14	0.0289373706551	0.171557268884	1.0
GO:0015980	energy derivation by oxidation of organic compounds	2	1	TcSYL_0174840,	50.0	34.31	69.14	0.0289373706551	0.171557268884	1.0
GO:0045333	cellular respiration	2	1	TcSYL_0174840,	50.0	34.31	69.14	0.0289373706551	0.171557268884	1.0
GO:0006397	mRNA processing	3	1	TcSYL_0173530,	33.3	22.87	34.56	0.0430973895539	0.223567708311	1.0
GO:0016071	mRNA metabolic process	3	1	TcSYL_0173530,	33.3	22.87	34.56	0.0430973895539	0.223567708311	1.0
