# Supplementary material for: Microevolution of Trypanosoma cruzi reveals hybridization and clonal mechanisms driving rapid genome diversification
Source: eLife. 2022 May 10;11:e75237. doi: 10.7554/eLife.75237 (PMC9098224; doi:10.7554/eLife.75237)
Supplement: Supplementary file 12. — Bgd count: Number of genes with this term in the genome; Result count: Number of genes with this term in our analysis; Pct of bgd: The percent of genes with this term in our analysis divided by the percent of genes with this term in the genome; Fold enrichment: Of the genes in the genome with this term, the percent that are present in your analysis. [file elife-75237-supp12.xlsx]

## Sheet: Table 13 - GO P2-800 loss 
ID	Name	Bgd count	Result count	Result gene list	Pct of bgd	Fold enrichment	Odds ratio	P-value	Benjamini	Bonferroni
GO:0008152	metabolic process	1336	487	TcSYL_0010960,TcSYL_0011700,TcSYL_0011710,TcSYL_0011740,TcSYL_0011750,TcSYL_0011790,TcSYL_0011820,TcSYL_0011850,TcSYL_0011860,TcSYL_0011870,TcSYL_0011950,TcSYL_0011970,TcSYL_0012030,TcSYL_0012040,TcSYL_0012070,TcSYL_0012100,TcSYL_0012110,TcSYL_0012140,TcSYL_0012150,TcSYL_0012180,TcSYL_0012280,TcSYL_0012330,TcSYL_0012340,TcSYL_0012370,TcSYL_0012450,TcSYL_0012460,TcSYL_0012500,TcSYL_0012530,TcSYL_0…	36.5	1.26	1.88	1.51030732828e-15	3.89659290697e-13	3.89659290697e-13
GO:0046364	monosaccharide biosynthetic process	23	23	TcSYL_0085680,TcSYL_0085920,TcSYL_0085930,TcSYL_0086090,TcSYL_0086100,TcSYL_0086110,TcSYL_0086160,TcSYL_0086170,TcSYL_0086180,TcSYL_0086190,TcSYL_0086210,TcSYL_0086220,TcSYL_0086240,TcSYL_0086250,TcSYL_0086280,TcSYL_0086300,TcSYL_0086310,TcSYL_0086320,TcSYL_0086330,TcSYL_0086340,TcSYL_0086350,TcSYL_0086370,TcSYL_0086380,	100.0	3.45	inf	3.56866214451e-13	2.30178708321e-11	9.20714833284e-11
GO:0019319	hexose biosynthetic process	23	23	TcSYL_0085680,TcSYL_0085920,TcSYL_0085930,TcSYL_0086090,TcSYL_0086100,TcSYL_0086110,TcSYL_0086160,TcSYL_0086170,TcSYL_0086180,TcSYL_0086190,TcSYL_0086210,TcSYL_0086220,TcSYL_0086240,TcSYL_0086250,TcSYL_0086280,TcSYL_0086300,TcSYL_0086310,TcSYL_0086320,TcSYL_0086330,TcSYL_0086340,TcSYL_0086350,TcSYL_0086370,TcSYL_0086380,	100.0	3.45	inf	3.56866214451e-13	2.30178708321e-11	9.20714833284e-11
GO:0006094	gluconeogenesis	23	23	TcSYL_0085680,TcSYL_0085920,TcSYL_0085930,TcSYL_0086090,TcSYL_0086100,TcSYL_0086110,TcSYL_0086160,TcSYL_0086170,TcSYL_0086180,TcSYL_0086190,TcSYL_0086210,TcSYL_0086220,TcSYL_0086240,TcSYL_0086250,TcSYL_0086280,TcSYL_0086300,TcSYL_0086310,TcSYL_0086320,TcSYL_0086330,TcSYL_0086340,TcSYL_0086350,TcSYL_0086370,TcSYL_0086380,	100.0	3.45	inf	3.56866214451e-13	2.30178708321e-11	9.20714833284e-11
GO:0016051	carbohydrate biosynthetic process	24	23	TcSYL_0085680,TcSYL_0085920,TcSYL_0085930,TcSYL_0086090,TcSYL_0086100,TcSYL_0086110,TcSYL_0086160,TcSYL_0086170,TcSYL_0086180,TcSYL_0086190,TcSYL_0086210,TcSYL_0086220,TcSYL_0086240,TcSYL_0086250,TcSYL_0086280,TcSYL_0086300,TcSYL_0086310,TcSYL_0086320,TcSYL_0086330,TcSYL_0086340,TcSYL_0086350,TcSYL_0086370,TcSYL_0086380,	95.8	3.3	57.72	6.22693703595e-12	3.21309951055e-10	1.60654975528e-09
GO:0006006	glucose metabolic process	26	23	TcSYL_0085680,TcSYL_0085920,TcSYL_0085930,TcSYL_0086090,TcSYL_0086100,TcSYL_0086110,TcSYL_0086160,TcSYL_0086170,TcSYL_0086180,TcSYL_0086190,TcSYL_0086210,TcSYL_0086220,TcSYL_0086240,TcSYL_0086250,TcSYL_0086280,TcSYL_0086300,TcSYL_0086310,TcSYL_0086320,TcSYL_0086330,TcSYL_0086340,TcSYL_0086350,TcSYL_0086370,TcSYL_0086380,	88.5	3.05	19.22	3.56717066439e-10	1.53388338569e-08	9.20330031412e-08
GO:0019318	hexose metabolic process	29	23	TcSYL_0085680,TcSYL_0085920,TcSYL_0085930,TcSYL_0086090,TcSYL_0086100,TcSYL_0086110,TcSYL_0086160,TcSYL_0086170,TcSYL_0086180,TcSYL_0086190,TcSYL_0086210,TcSYL_0086220,TcSYL_0086240,TcSYL_0086250,TcSYL_0086280,TcSYL_0086300,TcSYL_0086310,TcSYL_0086320,TcSYL_0086330,TcSYL_0086340,TcSYL_0086350,TcSYL_0086370,TcSYL_0086380,	79.3	2.73	9.6	2.50882739065e-08	8.09096833484e-07	6.47277466788e-06
GO:0005996	monosaccharide metabolic process	29	23	TcSYL_0085680,TcSYL_0085920,TcSYL_0085930,TcSYL_0086090,TcSYL_0086100,TcSYL_0086110,TcSYL_0086160,TcSYL_0086170,TcSYL_0086180,TcSYL_0086190,TcSYL_0086210,TcSYL_0086220,TcSYL_0086240,TcSYL_0086250,TcSYL_0086280,TcSYL_0086300,TcSYL_0086310,TcSYL_0086320,TcSYL_0086330,TcSYL_0086340,TcSYL_0086350,TcSYL_0086370,TcSYL_0086380,	79.3	2.73	9.6	2.50882739065e-08	8.09096833484e-07	6.47277466788e-06
GO:0055114	obsolete oxidation-reduction process	188	87	TcSYL_0022160,TcSYL_0023740,TcSYL_0024260,TcSYL_0024270,TcSYL_0034060,TcSYL_0034070,TcSYL_0034450,TcSYL_0038330,TcSYL_0038340,TcSYL_0038350,TcSYL_0038360,TcSYL_0041290,TcSYL_0052750,TcSYL_0055760,TcSYL_0055770,TcSYL_0055800,TcSYL_0056150,TcSYL_0056160,TcSYL_0056380,TcSYL_0056390,TcSYL_0056410,TcSYL_0056420,TcSYL_0061230,TcSYL_0074000,TcSYL_0077240,TcSYL_0082280,TcSYL_0082400,TcSYL_0082410,TcSYL_0…	46.3	1.59	2.23	1.70162486199e-07	4.87799127104e-06	4.39019214394e-05
GO:0044283	small molecule biosynthetic process	40	26	TcSYL_0053140,TcSYL_0053550,TcSYL_0085680,TcSYL_0085920,TcSYL_0085930,TcSYL_0086090,TcSYL_0086100,TcSYL_0086110,TcSYL_0086160,TcSYL_0086170,TcSYL_0086180,TcSYL_0086190,TcSYL_0086210,TcSYL_0086220,TcSYL_0086240,TcSYL_0086250,TcSYL_0086280,TcSYL_0086300,TcSYL_0086310,TcSYL_0086320,TcSYL_0086330,TcSYL_0086340,TcSYL_0086350,TcSYL_0086370,TcSYL_0086380,TcSYL_0201810,	65.0	2.24	4.65	2.19385708659e-06	5.66015128341e-05	0.000566015128341
GO:0022610	biological adhesion	145	67	TcSYL_0014690,TcSYL_0020740,TcSYL_0020830,TcSYL_0020840,TcSYL_0021850,TcSYL_0021930,TcSYL_0023730,TcSYL_0028250,TcSYL_0028640,TcSYL_0028650,TcSYL_0028920,TcSYL_0028930,TcSYL_0030880,TcSYL_0030970,TcSYL_0041300,TcSYL_0041310,TcSYL_0041320,TcSYL_0060670,TcSYL_0060780,TcSYL_0066100,TcSYL_0068660,TcSYL_0069650,TcSYL_0069660,TcSYL_0070510,TcSYL_0071040,TcSYL_0071830,TcSYL_0071840,TcSYL_0074310,TcSYL_0…	46.2	1.59	2.19	5.23506864839e-06	0.00011255397594	0.00135064771129
GO:0007155	cell adhesion	145	67	TcSYL_0014690,TcSYL_0020740,TcSYL_0020830,TcSYL_0020840,TcSYL_0021850,TcSYL_0021930,TcSYL_0023730,TcSYL_0028250,TcSYL_0028640,TcSYL_0028650,TcSYL_0028920,TcSYL_0028930,TcSYL_0030880,TcSYL_0030970,TcSYL_0041300,TcSYL_0041310,TcSYL_0041320,TcSYL_0060670,TcSYL_0060780,TcSYL_0066100,TcSYL_0068660,TcSYL_0069650,TcSYL_0069660,TcSYL_0070510,TcSYL_0071040,TcSYL_0071830,TcSYL_0071840,TcSYL_0074310,TcSYL_0…	46.2	1.59	2.19	5.23506864839e-06	0.00011255397594	0.00135064771129
GO:0009072	aromatic amino acid family metabolic process	12	11	TcSYL_0012070,TcSYL_0012370,TcSYL_0012530,TcSYL_0130970,TcSYL_0167910,TcSYL_0168130,TcSYL_0168160,TcSYL_0168190,TcSYL_0168310,TcSYL_0168550,TcSYL_0168590,	91.7	3.16	27.23	1.03796840883e-05	0.000205996807291	0.00267795849478
GO:0000077	DNA damage checkpoint	8	8	TcSYL_0022300,TcSYL_0022360,TcSYL_0022390,TcSYL_0040040,TcSYL_0040060,TcSYL_0040400,TcSYL_0157370,TcSYL_0157410,	100.0	3.45	inf	4.91334330994e-05	0.000792276608728	0.0126764257397
GO:0000075	cell cycle checkpoint	8	8	TcSYL_0022300,TcSYL_0022360,TcSYL_0022390,TcSYL_0040040,TcSYL_0040060,TcSYL_0040400,TcSYL_0157370,TcSYL_0157410,	100.0	3.45	inf	4.91334330994e-05	0.000792276608728	0.0126764257397
GO:0031570	DNA integrity checkpoint	8	8	TcSYL_0022300,TcSYL_0022360,TcSYL_0022390,TcSYL_0040040,TcSYL_0040060,TcSYL_0040400,TcSYL_0157370,TcSYL_0157410,	100.0	3.45	inf	4.91334330994e-05	0.000792276608728	0.0126764257397
GO:0009058	biosynthetic process	407	145	TcSYL_0011700,TcSYL_0011710,TcSYL_0011740,TcSYL_0011750,TcSYL_0011790,TcSYL_0011820,TcSYL_0011850,TcSYL_0011860,TcSYL_0011870,TcSYL_0011950,TcSYL_0011970,TcSYL_0012030,TcSYL_0012040,TcSYL_0012070,TcSYL_0012100,TcSYL_0012110,TcSYL_0012140,TcSYL_0012150,TcSYL_0012180,TcSYL_0012280,TcSYL_0012330,TcSYL_0012340,TcSYL_0012370,TcSYL_0012450,TcSYL_0012460,TcSYL_0012500,TcSYL_0012530,TcSYL_0012560,TcSYL_0…	35.6	1.23	1.42	0.00114367384579	0.0173569324832	0.295067852215
GO:0045786	negative regulation of cell cycle	10	8	TcSYL_0022300,TcSYL_0022360,TcSYL_0022390,TcSYL_0040040,TcSYL_0040060,TcSYL_0040400,TcSYL_0157370,TcSYL_0157410,	80.0	2.76	9.86	0.00122465654504	0.0175534104789	0.315961388621
GO:0006508	proteolysis	295	108	TcSYL_0010960,TcSYL_0014690,TcSYL_0020740,TcSYL_0020830,TcSYL_0020840,TcSYL_0021850,TcSYL_0021930,TcSYL_0023730,TcSYL_0028250,TcSYL_0028640,TcSYL_0028650,TcSYL_0028920,TcSYL_0028930,TcSYL_0030880,TcSYL_0030970,TcSYL_0041270,TcSYL_0041300,TcSYL_0041310,TcSYL_0041320,TcSYL_0060670,TcSYL_0060780,TcSYL_0062230,TcSYL_0066100,TcSYL_0068660,TcSYL_0069650,TcSYL_0069660,TcSYL_0070510,TcSYL_0071040,TcSYL_0…	36.6	1.26	1.47	0.00184153850428	0.0250061544265	0.475116934104
GO:0048519	negative regulation of biological process	13	9	TcSYL_0009010,TcSYL_0022300,TcSYL_0022360,TcSYL_0022390,TcSYL_0040040,TcSYL_0040060,TcSYL_0040400,TcSYL_0157370,TcSYL_0157410,	69.2	2.39	5.55	0.00307080671887	0.0377270539747	0.79226813347
GO:0048523	negative regulation of cellular process	13	9	TcSYL_0009010,TcSYL_0022300,TcSYL_0022360,TcSYL_0022390,TcSYL_0040040,TcSYL_0040060,TcSYL_0040400,TcSYL_0157370,TcSYL_0157410,	69.2	2.39	5.55	0.00307080671887	0.0377270539747	0.79226813347
GO:0006520	cellular amino acid metabolic process	67	30	TcSYL_0011820,TcSYL_0012070,TcSYL_0012370,TcSYL_0012500,TcSYL_0012530,TcSYL_0022370,TcSYL_0022480,TcSYL_0040030,TcSYL_0053140,TcSYL_0053550,TcSYL_0074000,TcSYL_0110640,TcSYL_0130970,TcSYL_0157360,TcSYL_0167350,TcSYL_0167700,TcSYL_0167740,TcSYL_0167870,TcSYL_0167910,TcSYL_0168000,TcSYL_0168130,TcSYL_0168160,TcSYL_0168190,TcSYL_0168310,TcSYL_0168480,TcSYL_0168520,TcSYL_0168550,TcSYL_0168590,TcSYL_0…	44.8	1.54	2.02	0.00402626745963	0.0472171365721	1.0
GO:0005975	carbohydrate metabolic process	50	23	TcSYL_0085680,TcSYL_0085920,TcSYL_0085930,TcSYL_0086090,TcSYL_0086100,TcSYL_0086110,TcSYL_0086160,TcSYL_0086170,TcSYL_0086180,TcSYL_0086190,TcSYL_0086210,TcSYL_0086220,TcSYL_0086240,TcSYL_0086250,TcSYL_0086280,TcSYL_0086300,TcSYL_0086310,TcSYL_0086320,TcSYL_0086330,TcSYL_0086340,TcSYL_0086350,TcSYL_0086370,TcSYL_0086380,	46.0	1.59	2.11	0.00757630306034	0.0849863560681	1.0
GO:0042026	protein refolding	8	6	TcSYL_0011280,TcSYL_0011360,TcSYL_0011390,TcSYL_0011400,TcSYL_0011410,TcSYL_0011440,	75.0	2.58	7.38	0.00936908241147	0.100717635923	1.0
GO:0051726	regulation of cell cycle	15	8	TcSYL_0022300,TcSYL_0022360,TcSYL_0022390,TcSYL_0040040,TcSYL_0040060,TcSYL_0040400,TcSYL_0157370,TcSYL_0157410,	53.3	1.84	2.81	0.0410855688301	0.424003070326	1.0
