# Supplementary material for: Microevolution of Trypanosoma cruzi reveals hybridization and clonal mechanisms driving rapid genome diversification
Source: eLife. 2022 May 10;11:e75237. doi: 10.7554/eLife.75237 (PMC9098224; doi:10.7554/eLife.75237)
Supplement: Supplementary file 13. [file elife-75237-supp13.xlsx]

## Sheet: Sheet1
	Non-synonymous SNPs presents in the first generation			Non-synonymous SNPs after culture growth
	SNPs in SM genes	SNPs in other genes	Ratio SM/other genes	SNPs in SM genes	SNPs in other genes	Ratio SM/other genes
P1-1	3498	10826	0.32	866	1056	0.82
P1-2	3424	10771	0.32	851	1058	0.80
P1-3	3473	10824	0.32	980	1134	0.86
P2-1	2466	9502	0.26	1935	2148	0.90
P2-2	2526	9537	0.26	2039	2233	0.91
P2-3	2410	9353	0.26	1902	2243	0.85
1C2-1	789	982	0.80	593	733	0.81
1C2-2	912	1224	0.75	595	785	0.76
1C2-3	846	1084	0.78	647	800	0.81
1D12-1	842	1180	0.71	543	698	0.78
1D12-2	288	439	0.66	215	254	0.85
1D12-3	977	1300	0.75	537	723	0.74
2C1-1	1154	1456	0.79	620	724	0.86
2C1-2	694	849	0.82	505	671	0.75
2C1-3	1057	1344	0.79	541	754	0.72
