# Supplementary figures and images for: Microevolution of Trypanosoma cruzi reveals hybridization and clonal mechanisms driving rapid genome diversification
Source: eLife journal article supplement (doi:10.7554/elife.75237), 2022-05-09

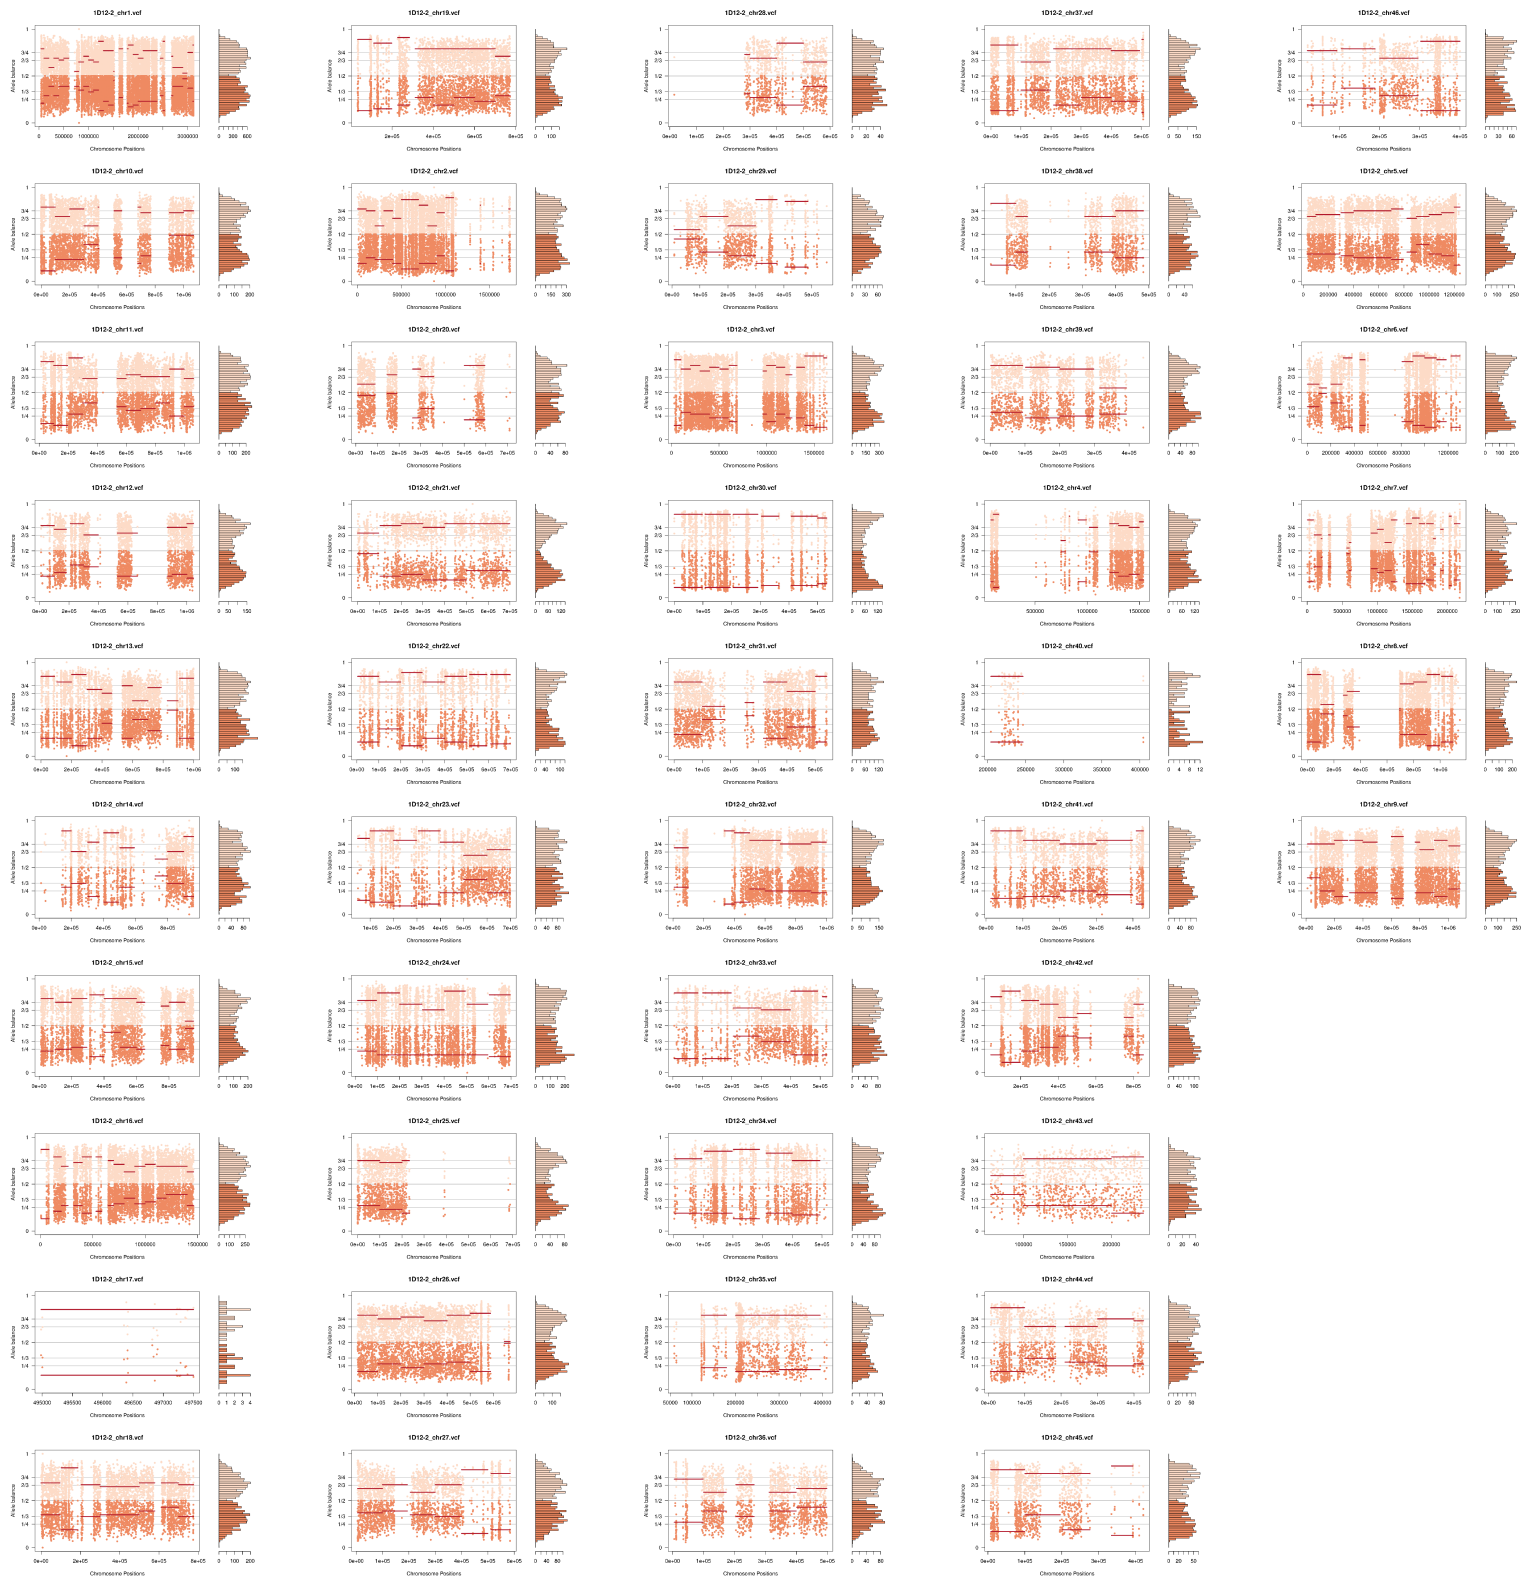

Supplement: supp [file elife-75237-supp-v1.zip]

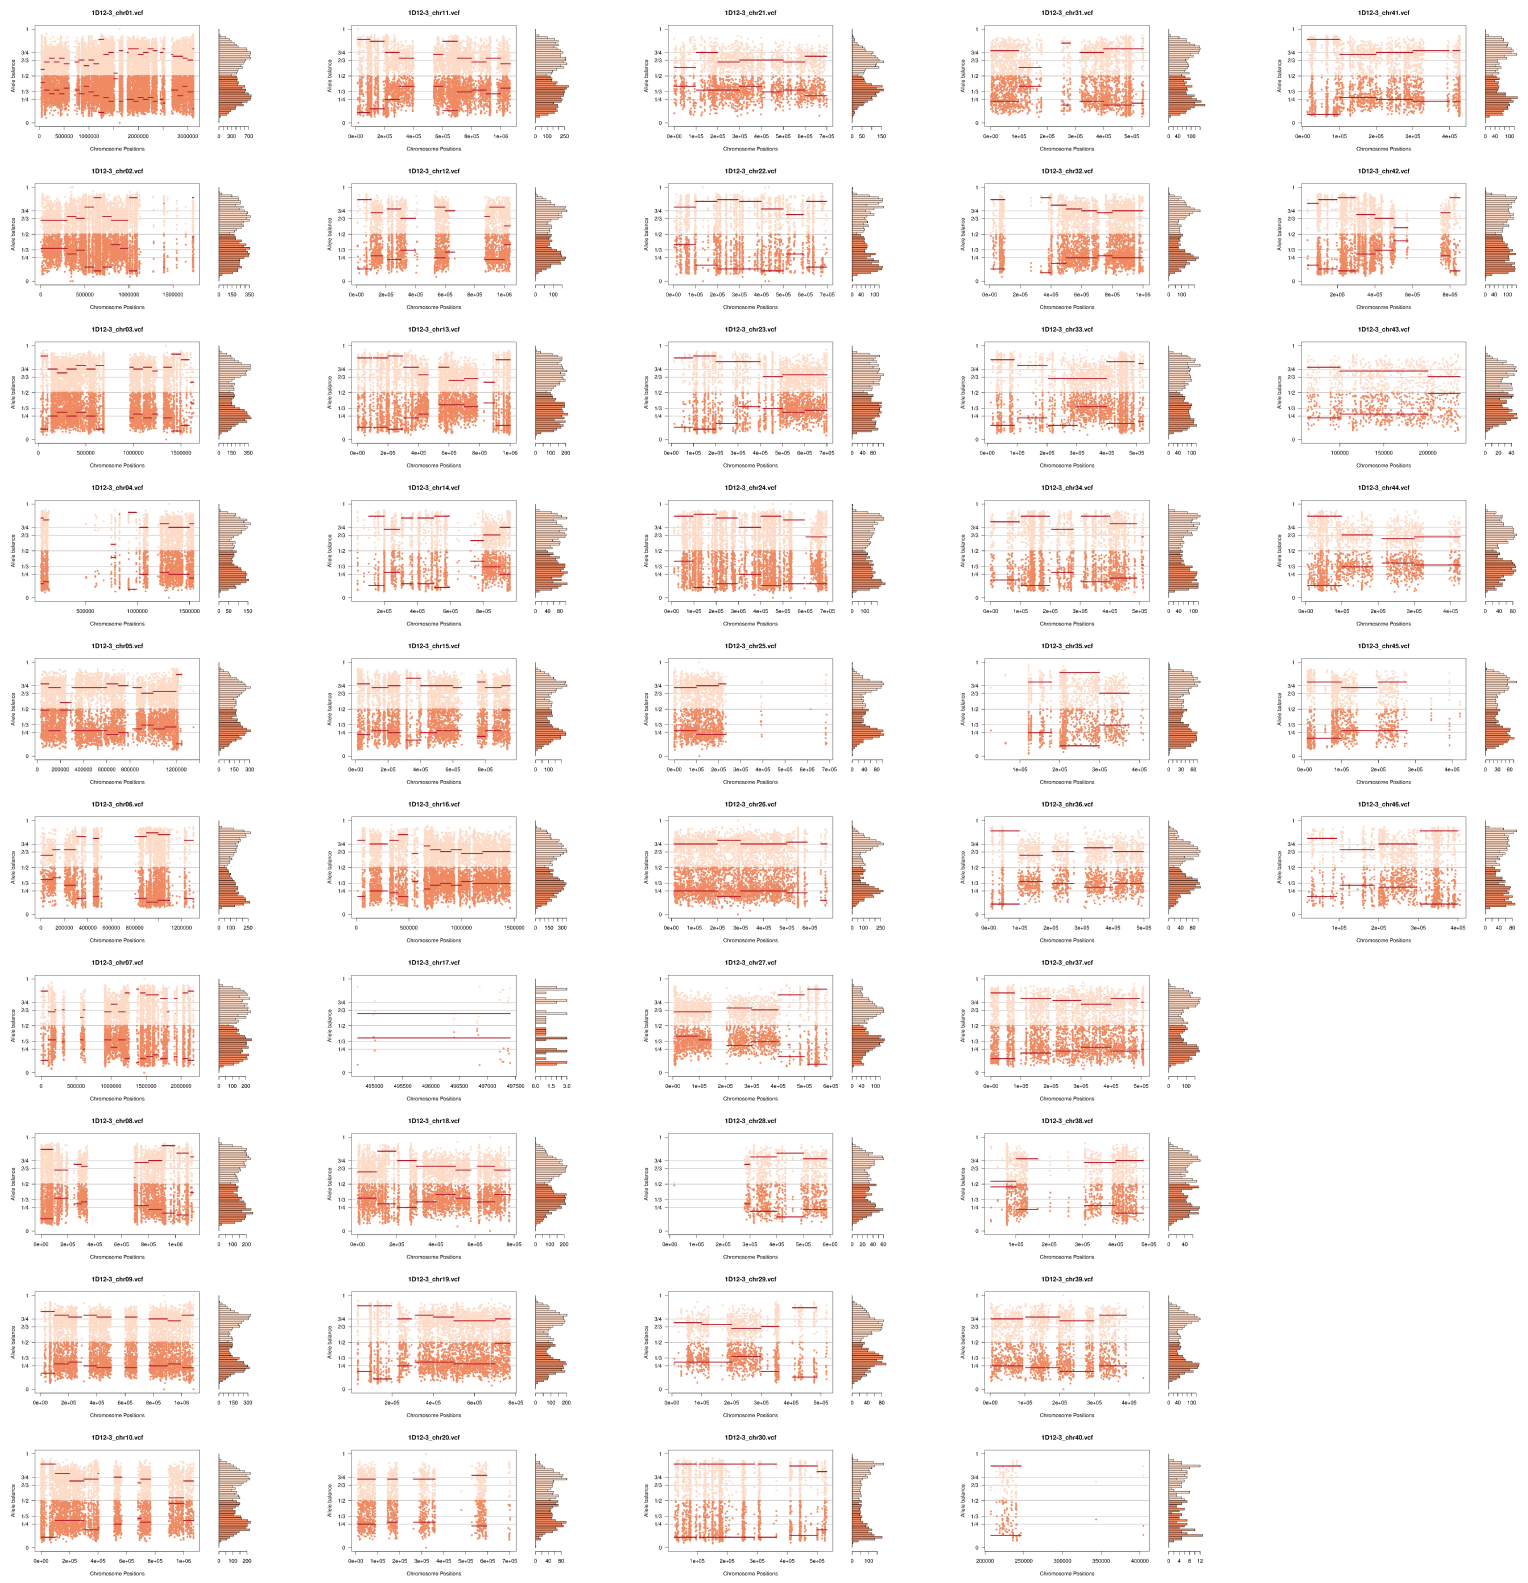

Supplement: supp [file elife-75237-supp-v1.zip]

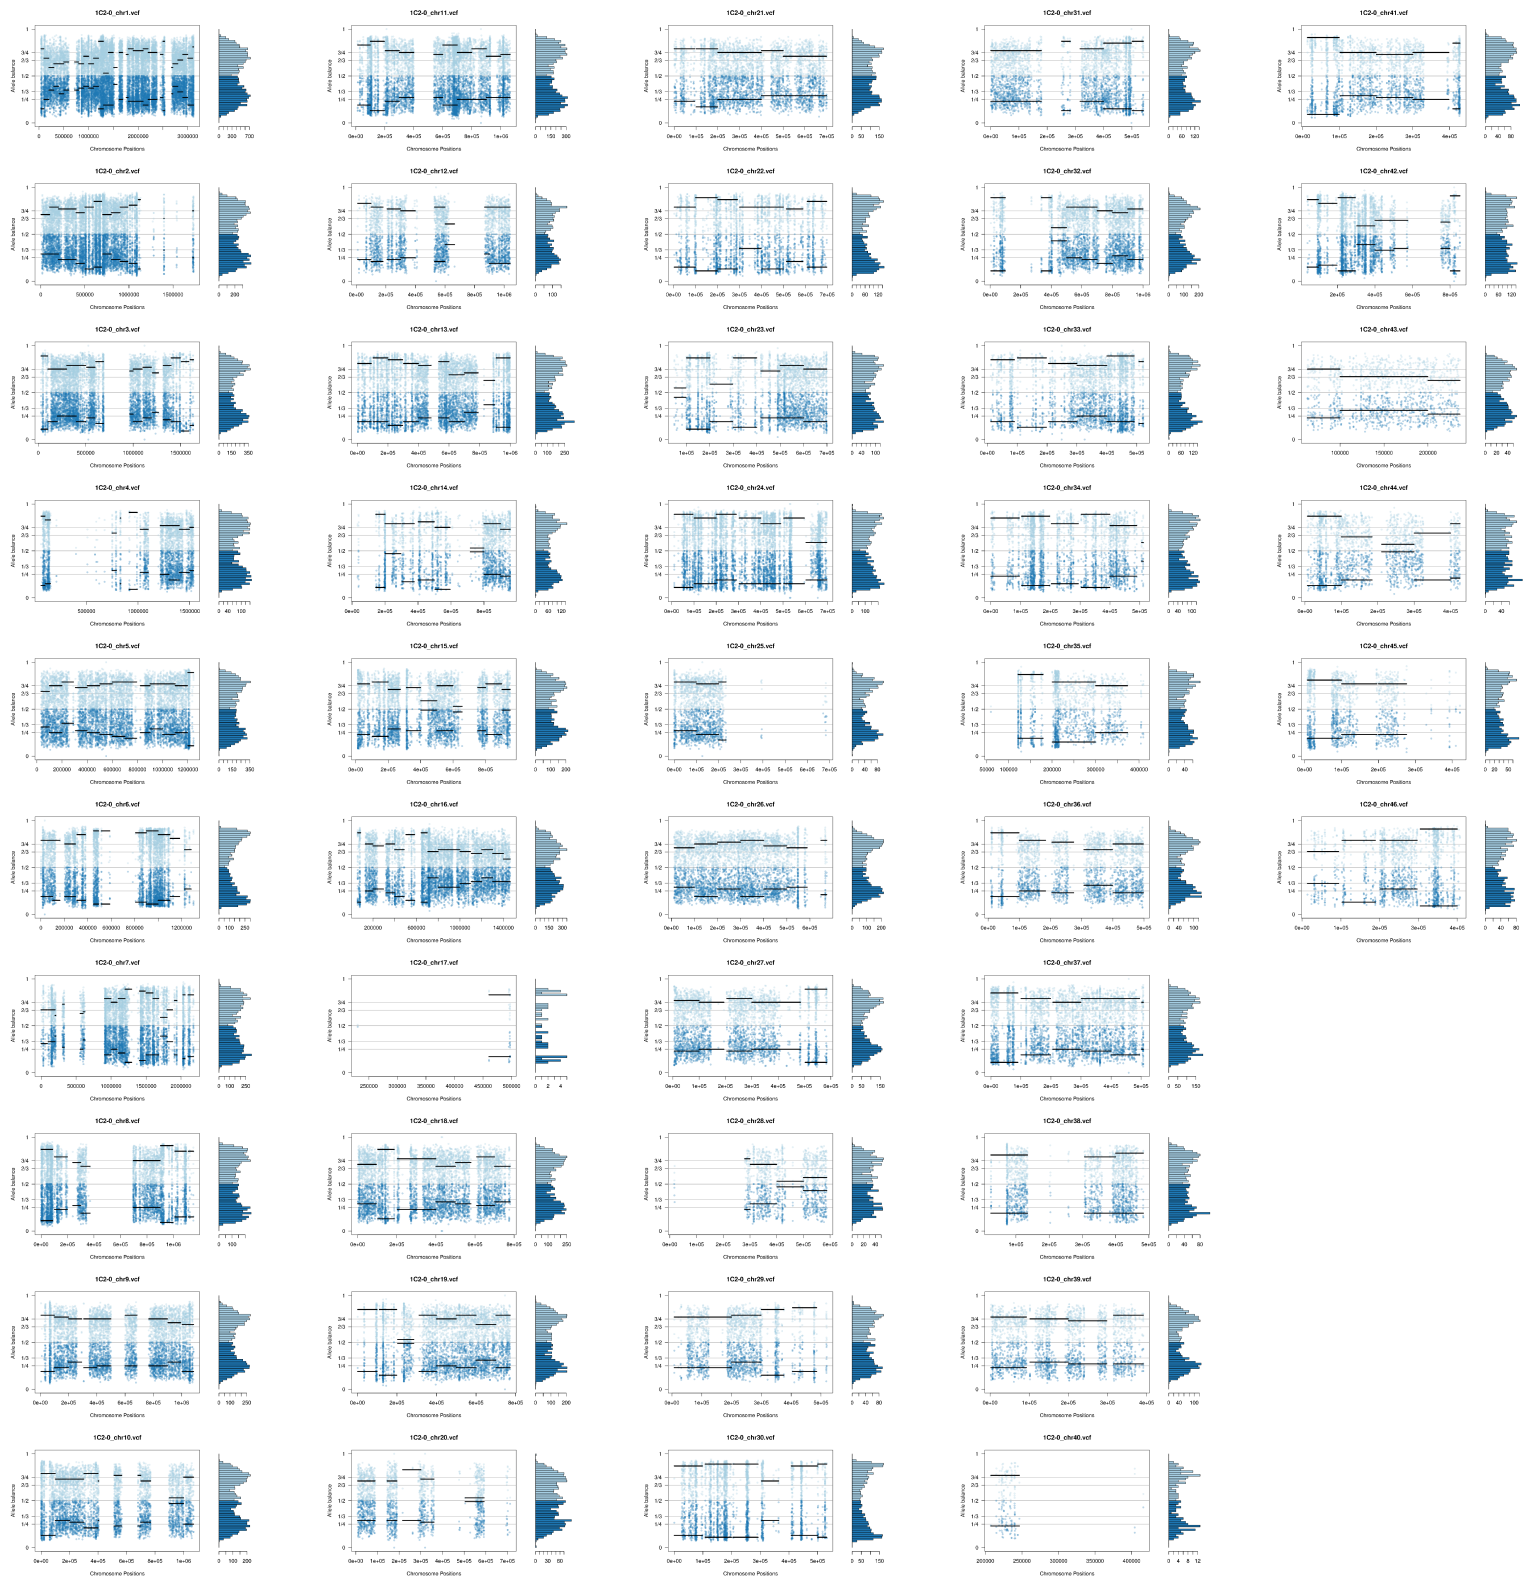

Supplement: supp [file elife-75237-supp-v1.zip]

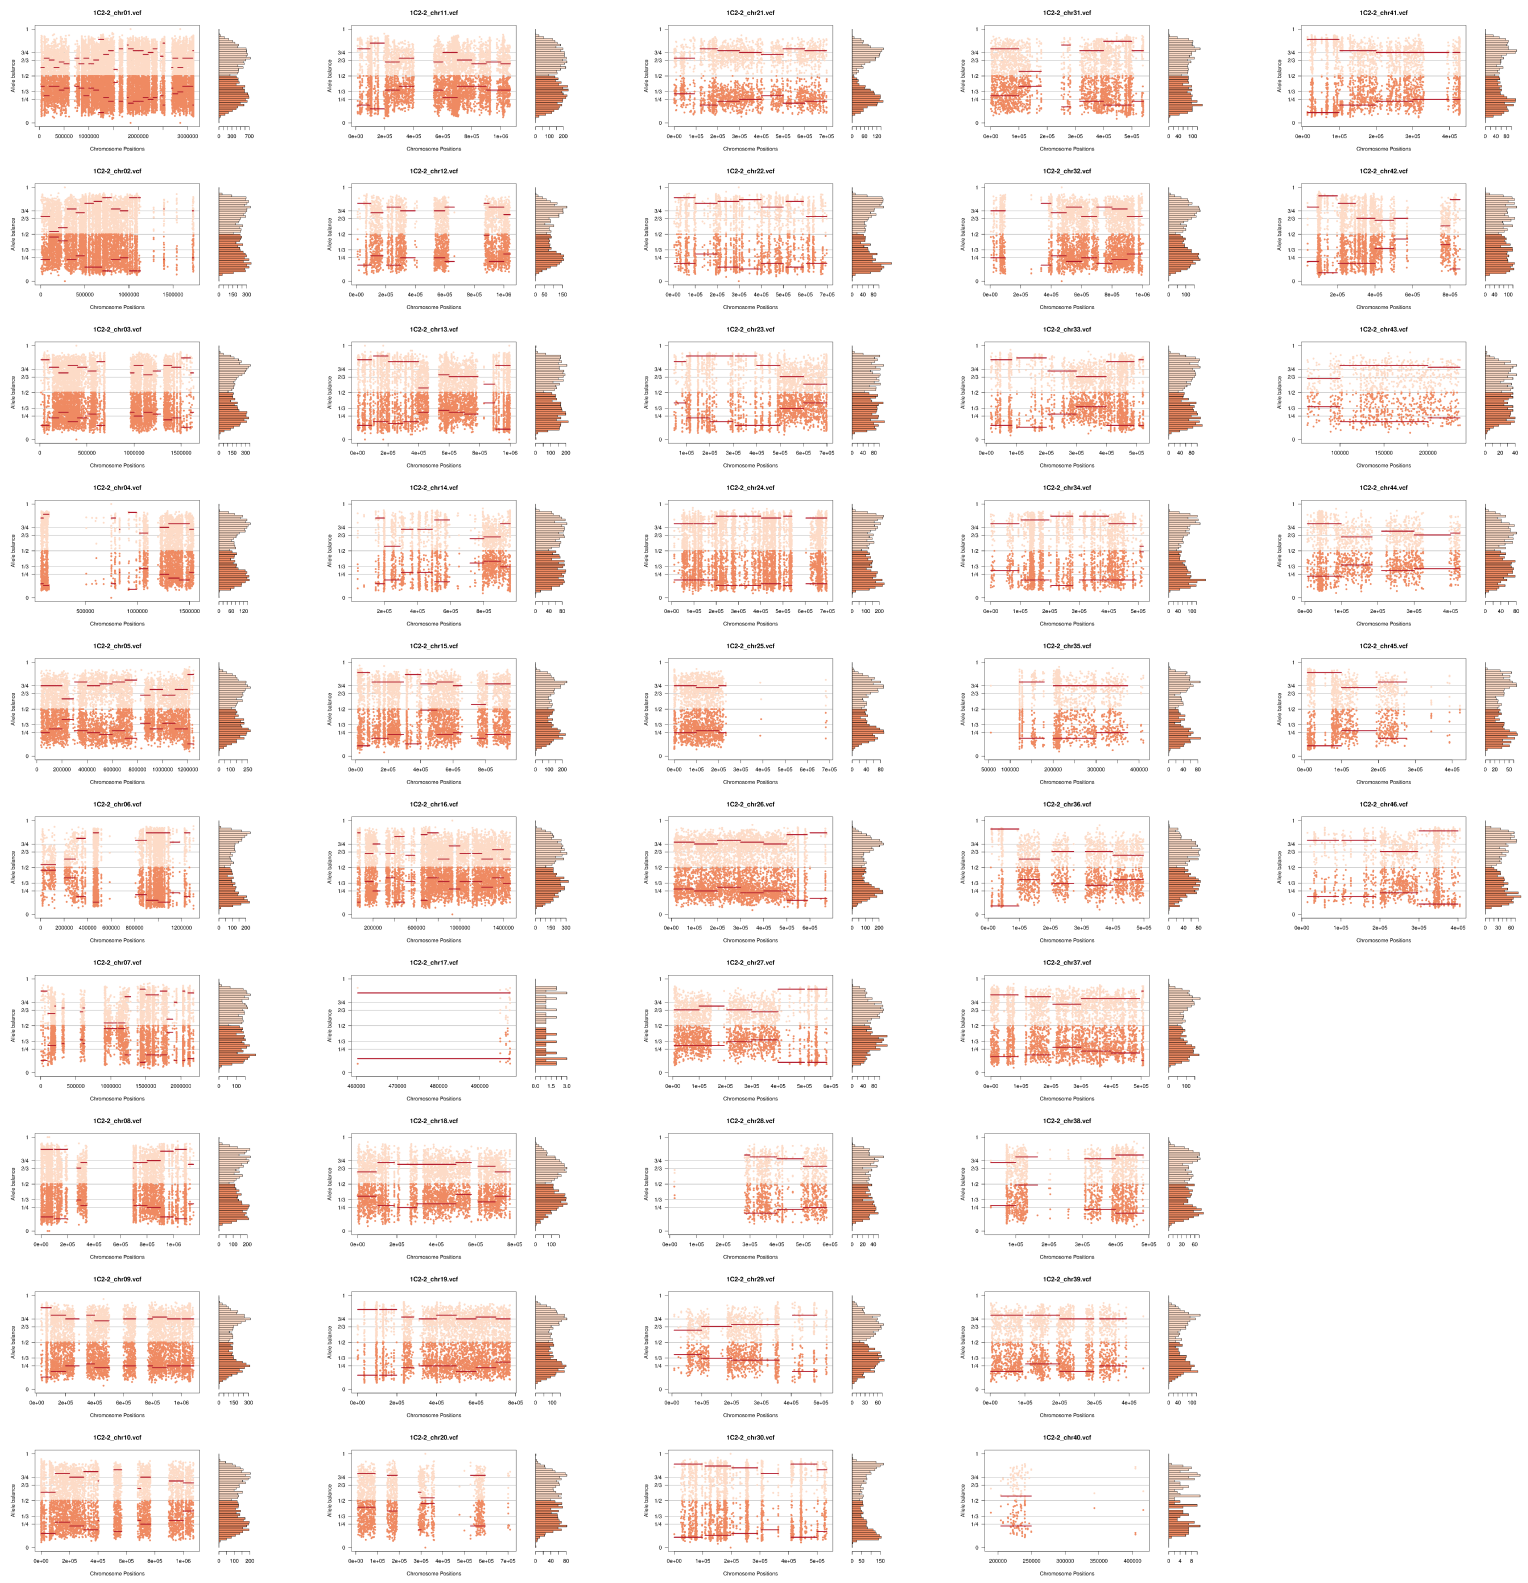

Supplement: supp [file elife-75237-supp-v1.zip]

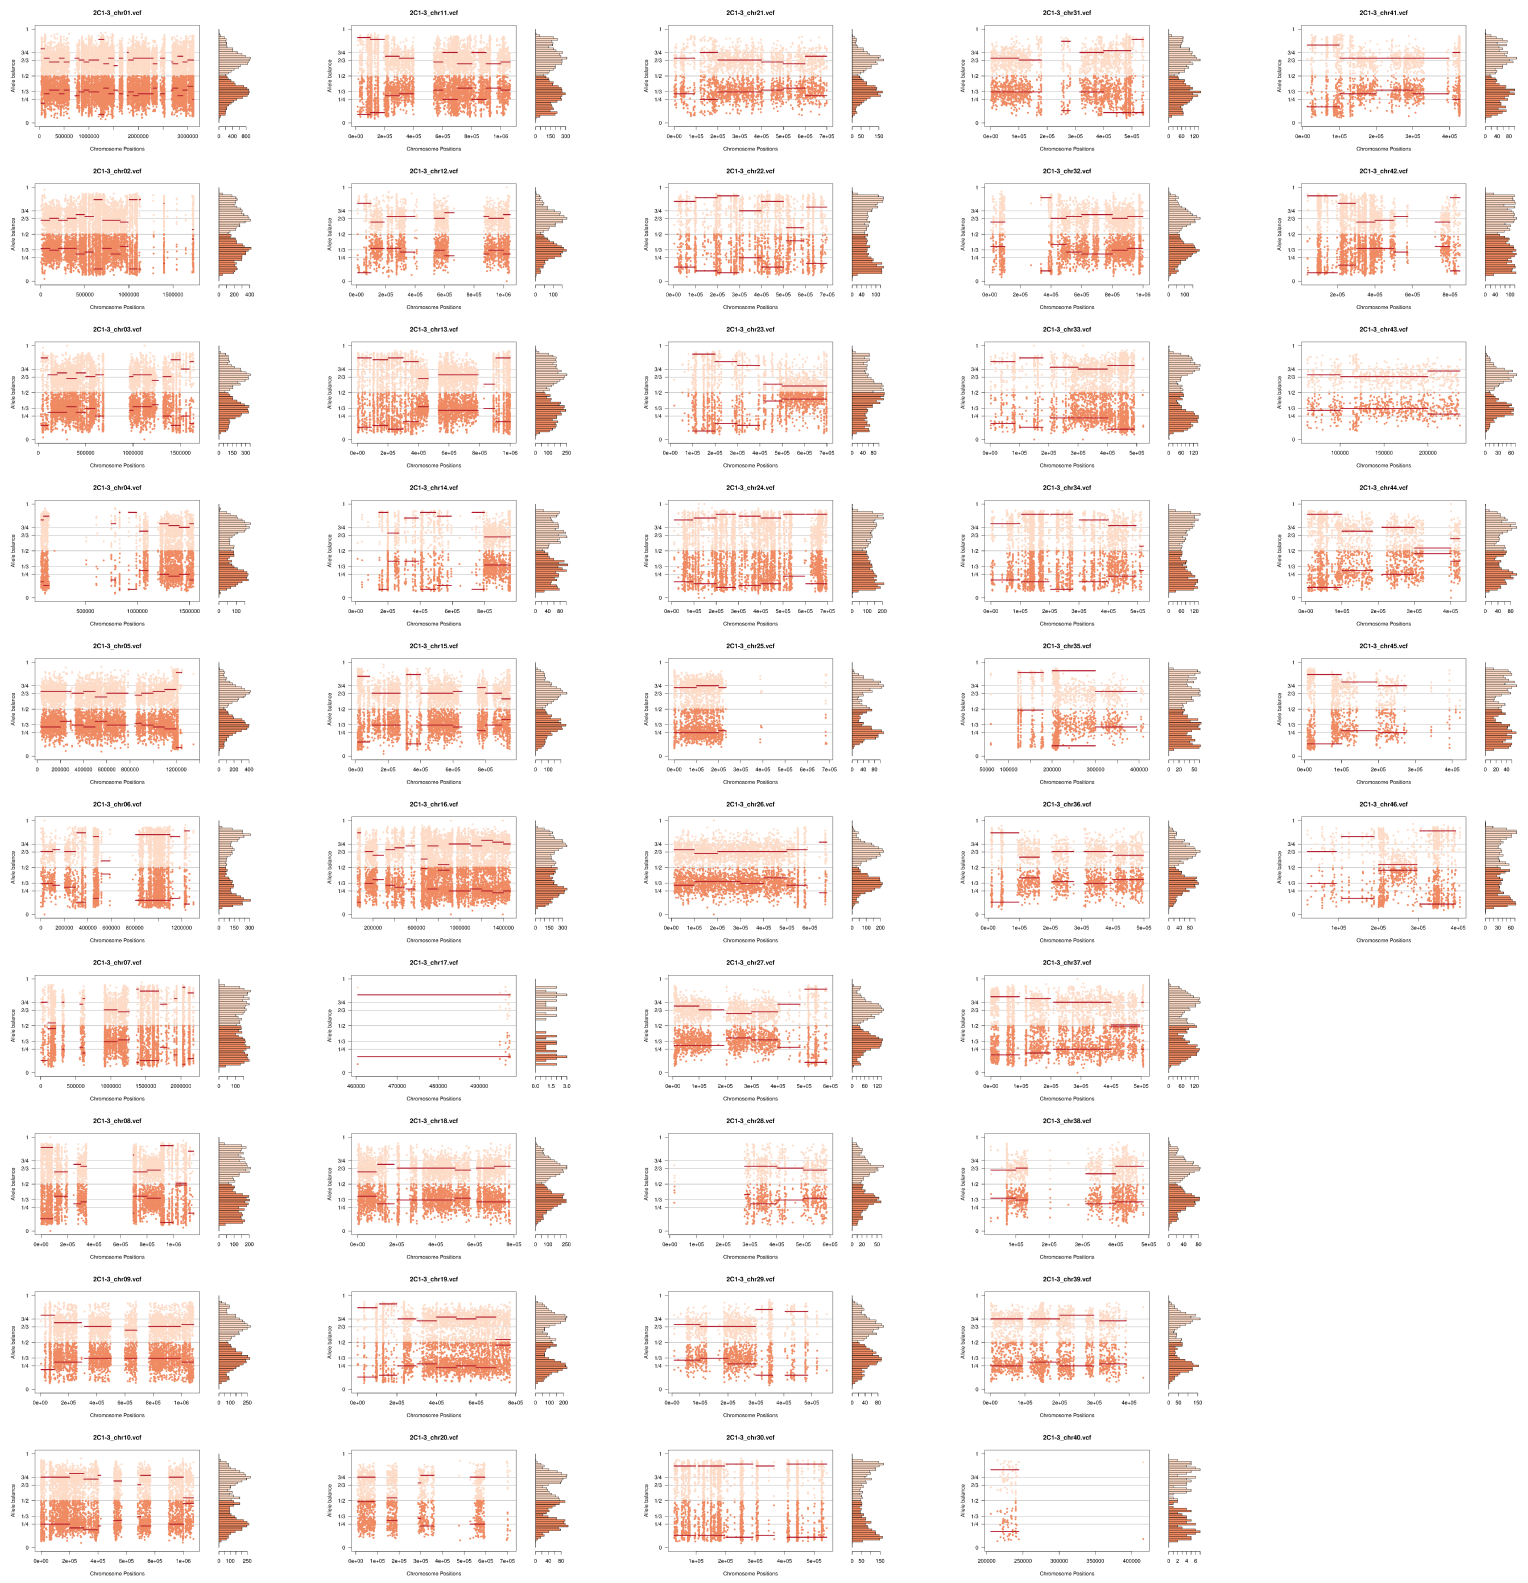

Supplement: supp [file elife-75237-supp-v1.zip]

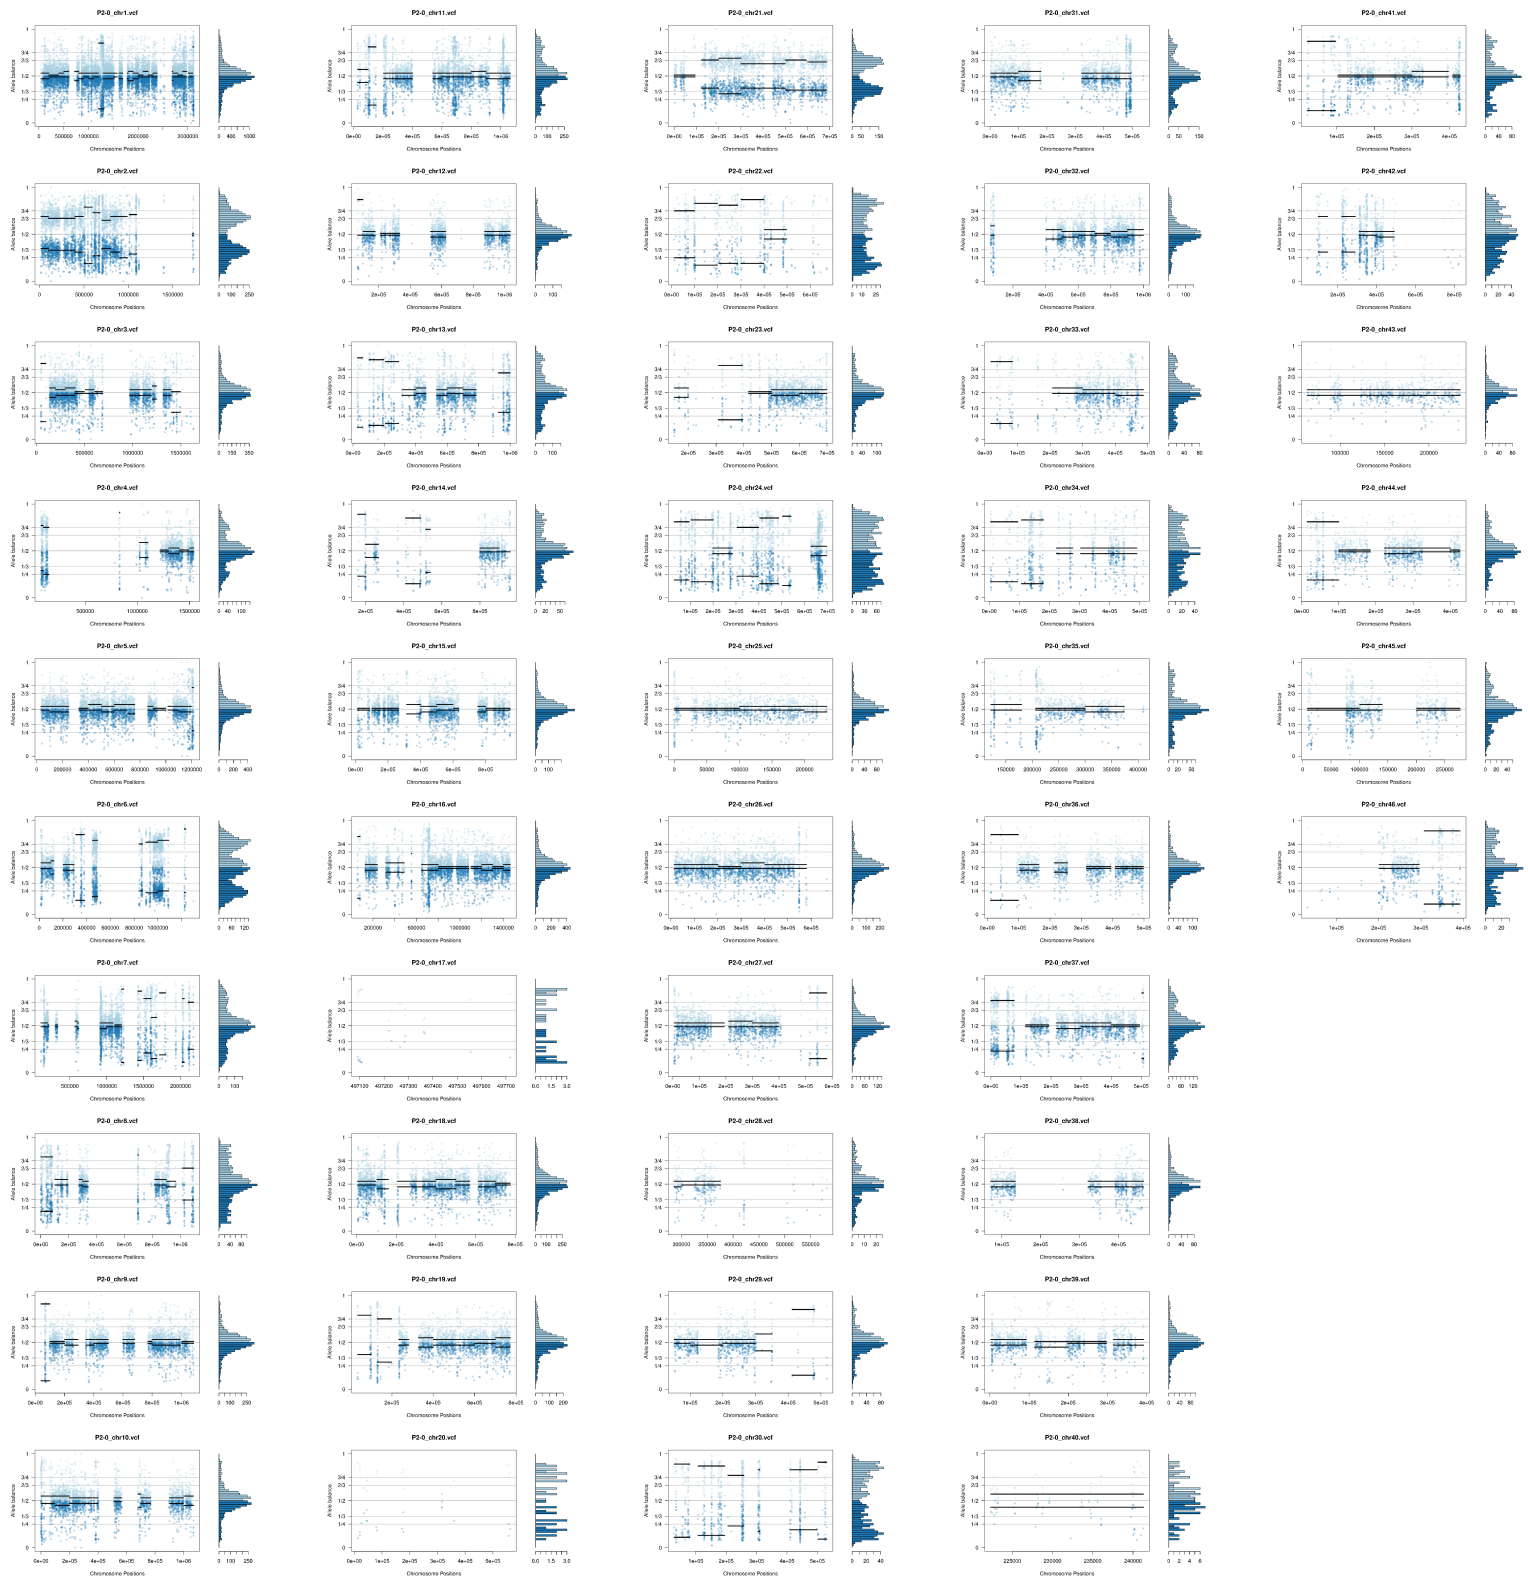

Supplement: supp [file elife-75237-supp-v1.zip]

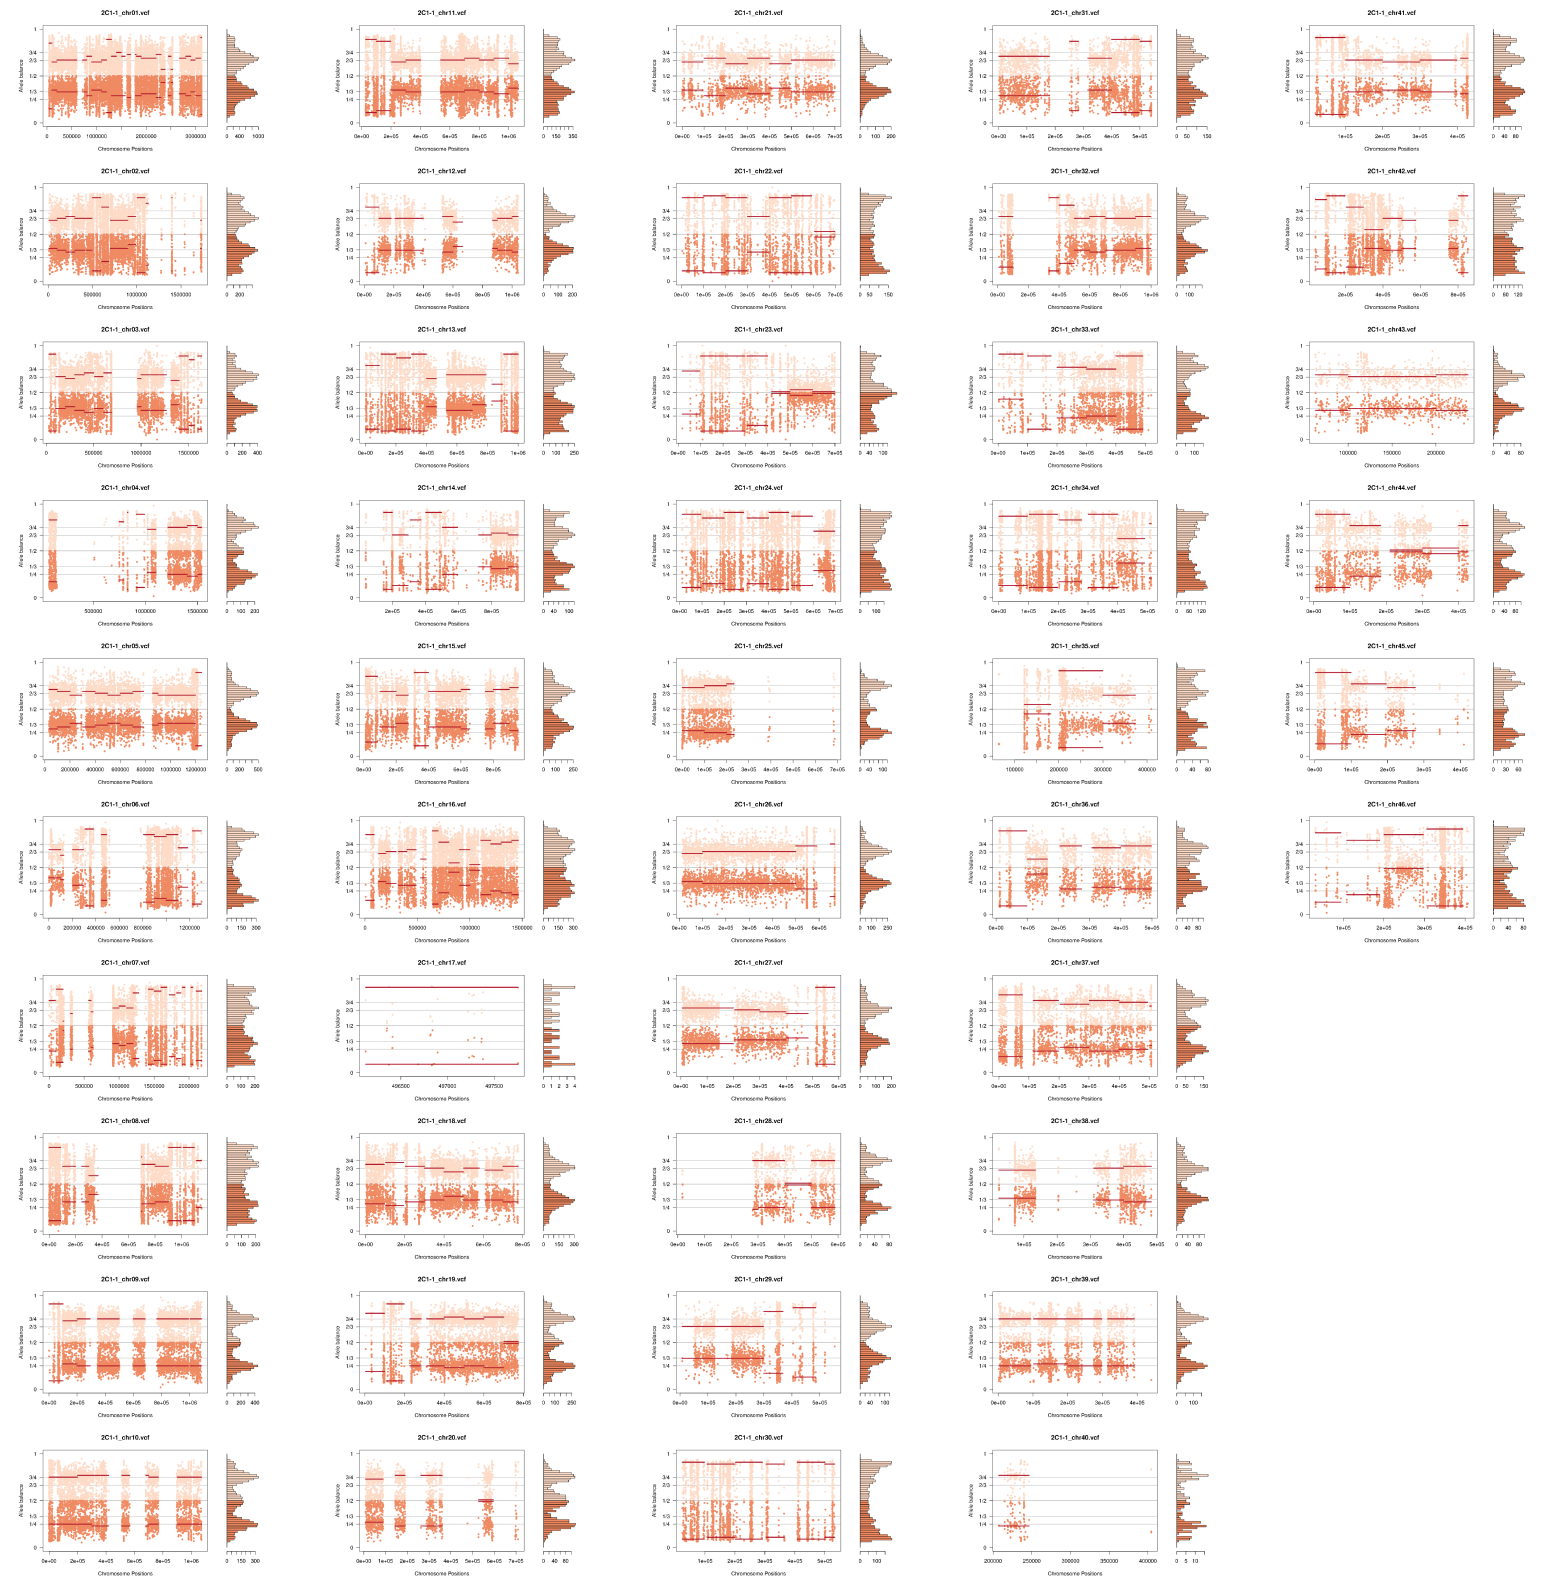

Supplement: supp [file elife-75237-supp-v1.zip]

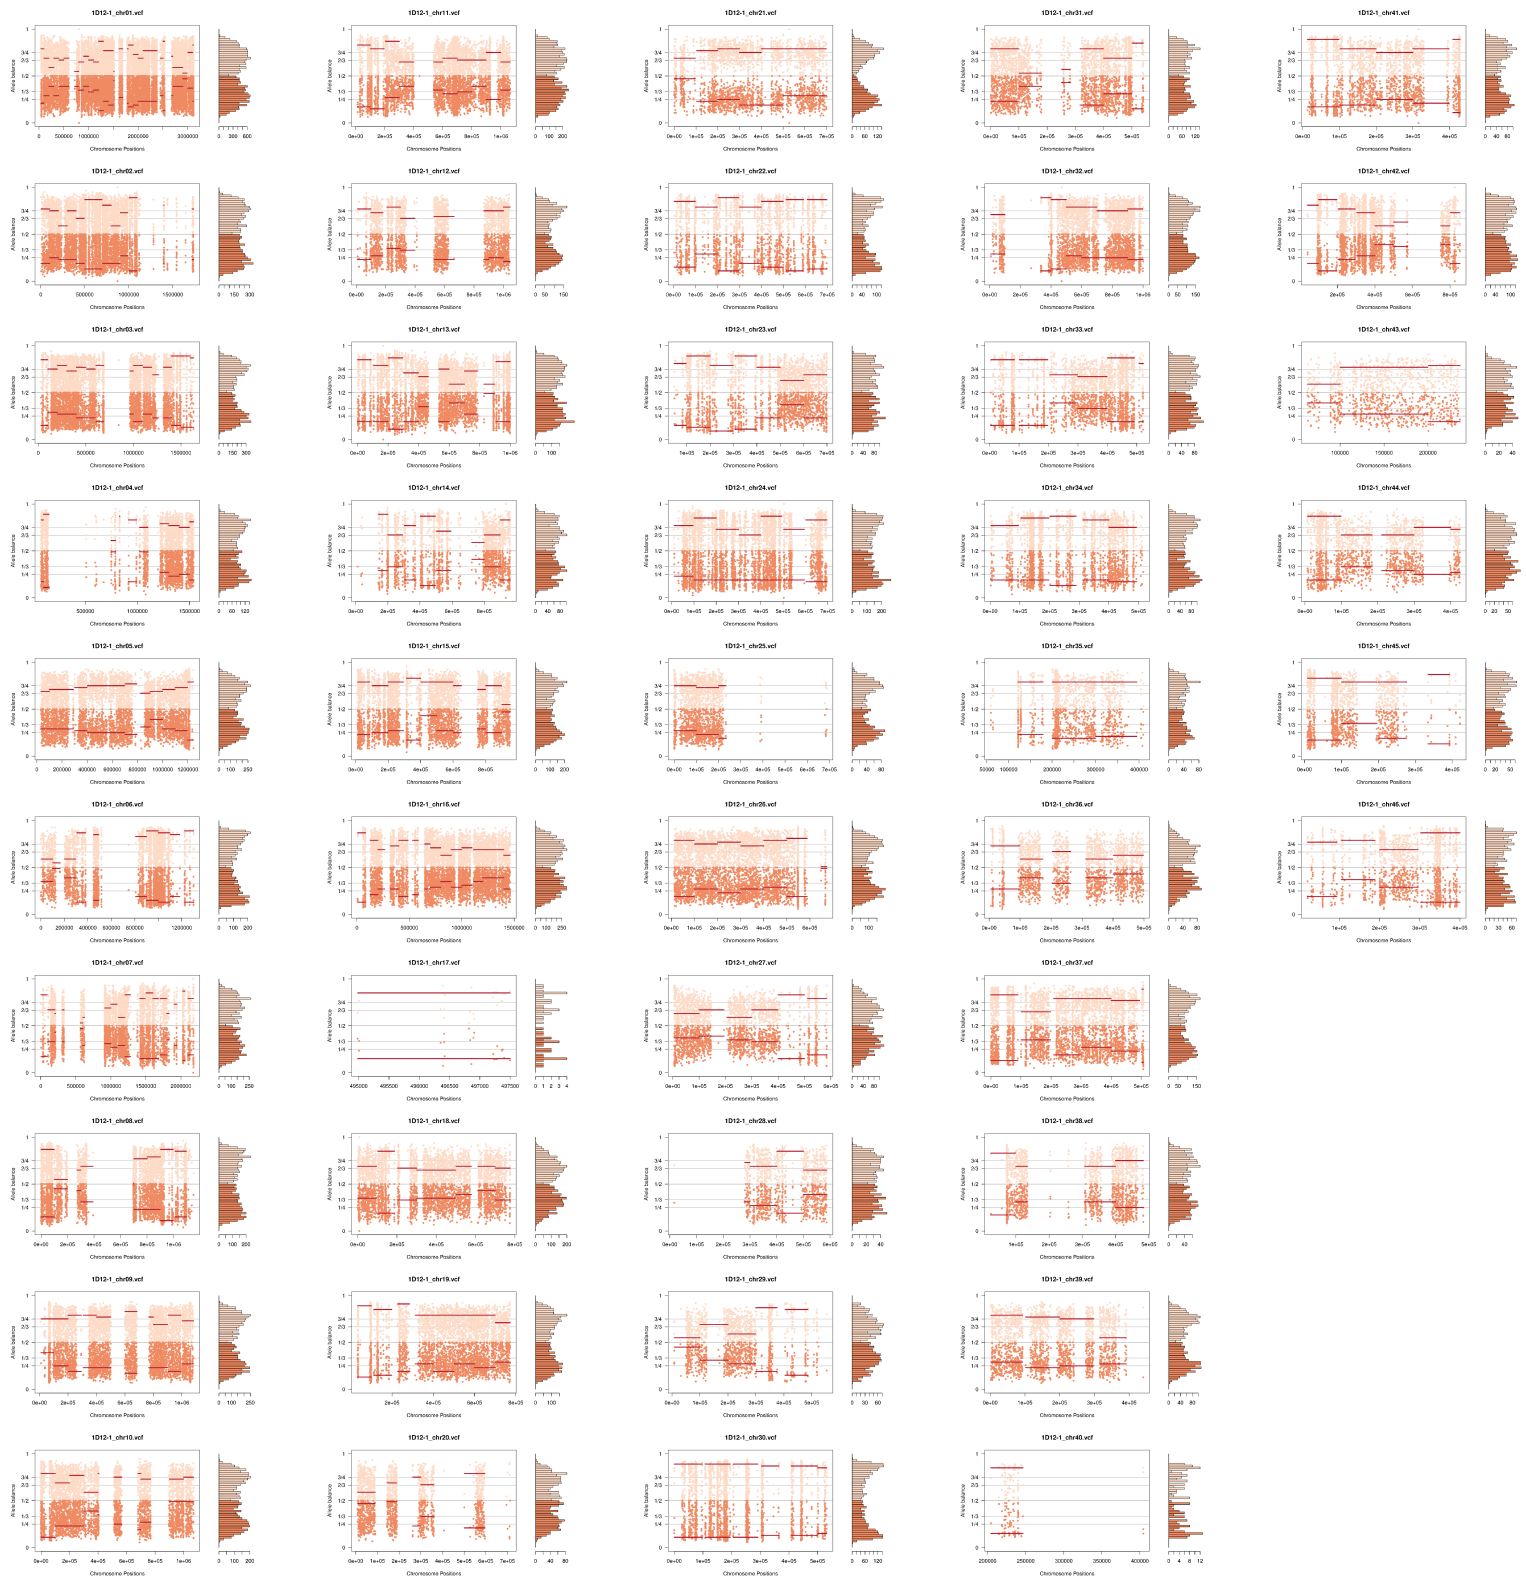

Supplement: supp [file elife-75237-supp-v1.zip]

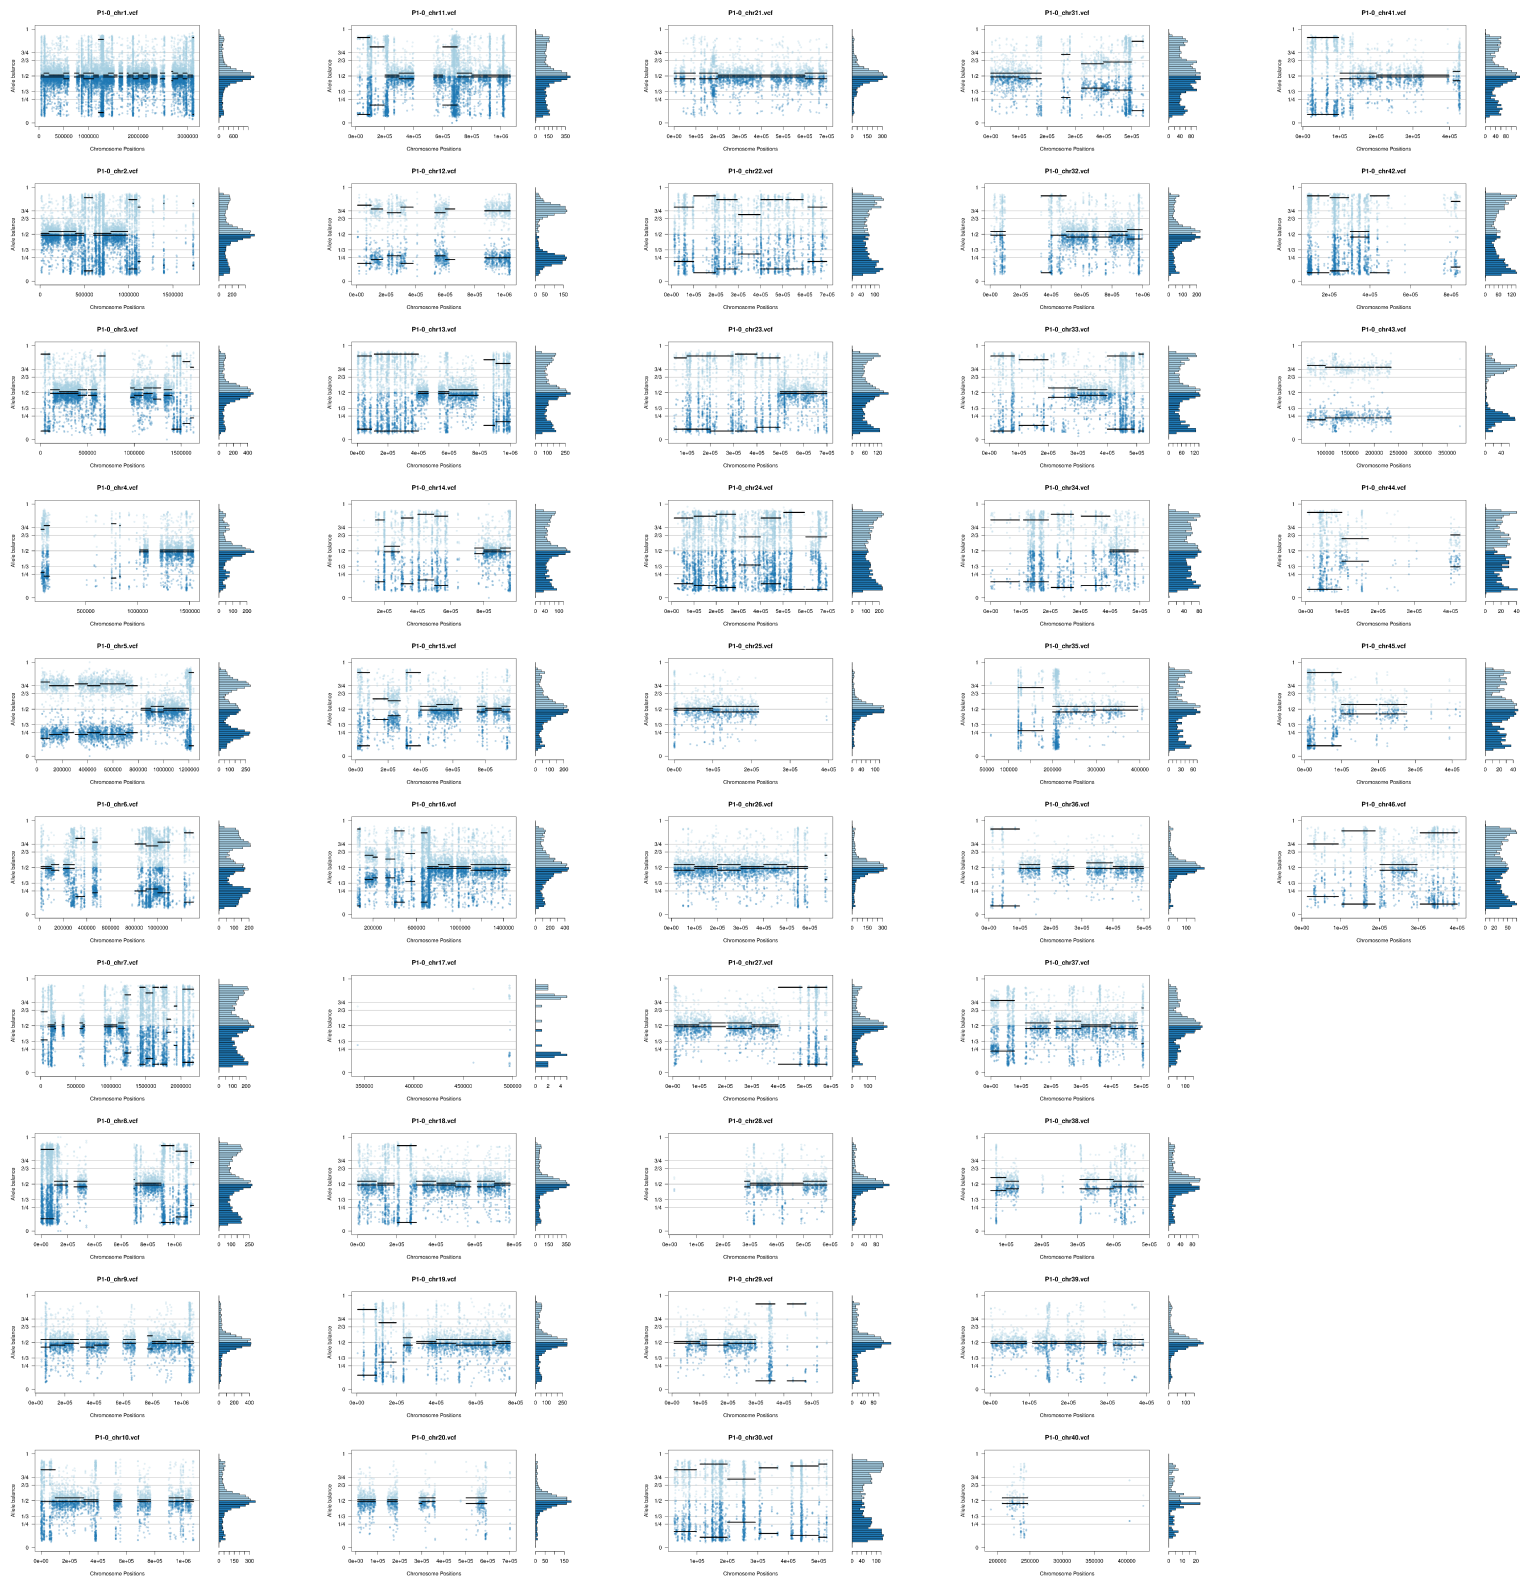

Supplement: supp [file elife-75237-supp-v1.zip]

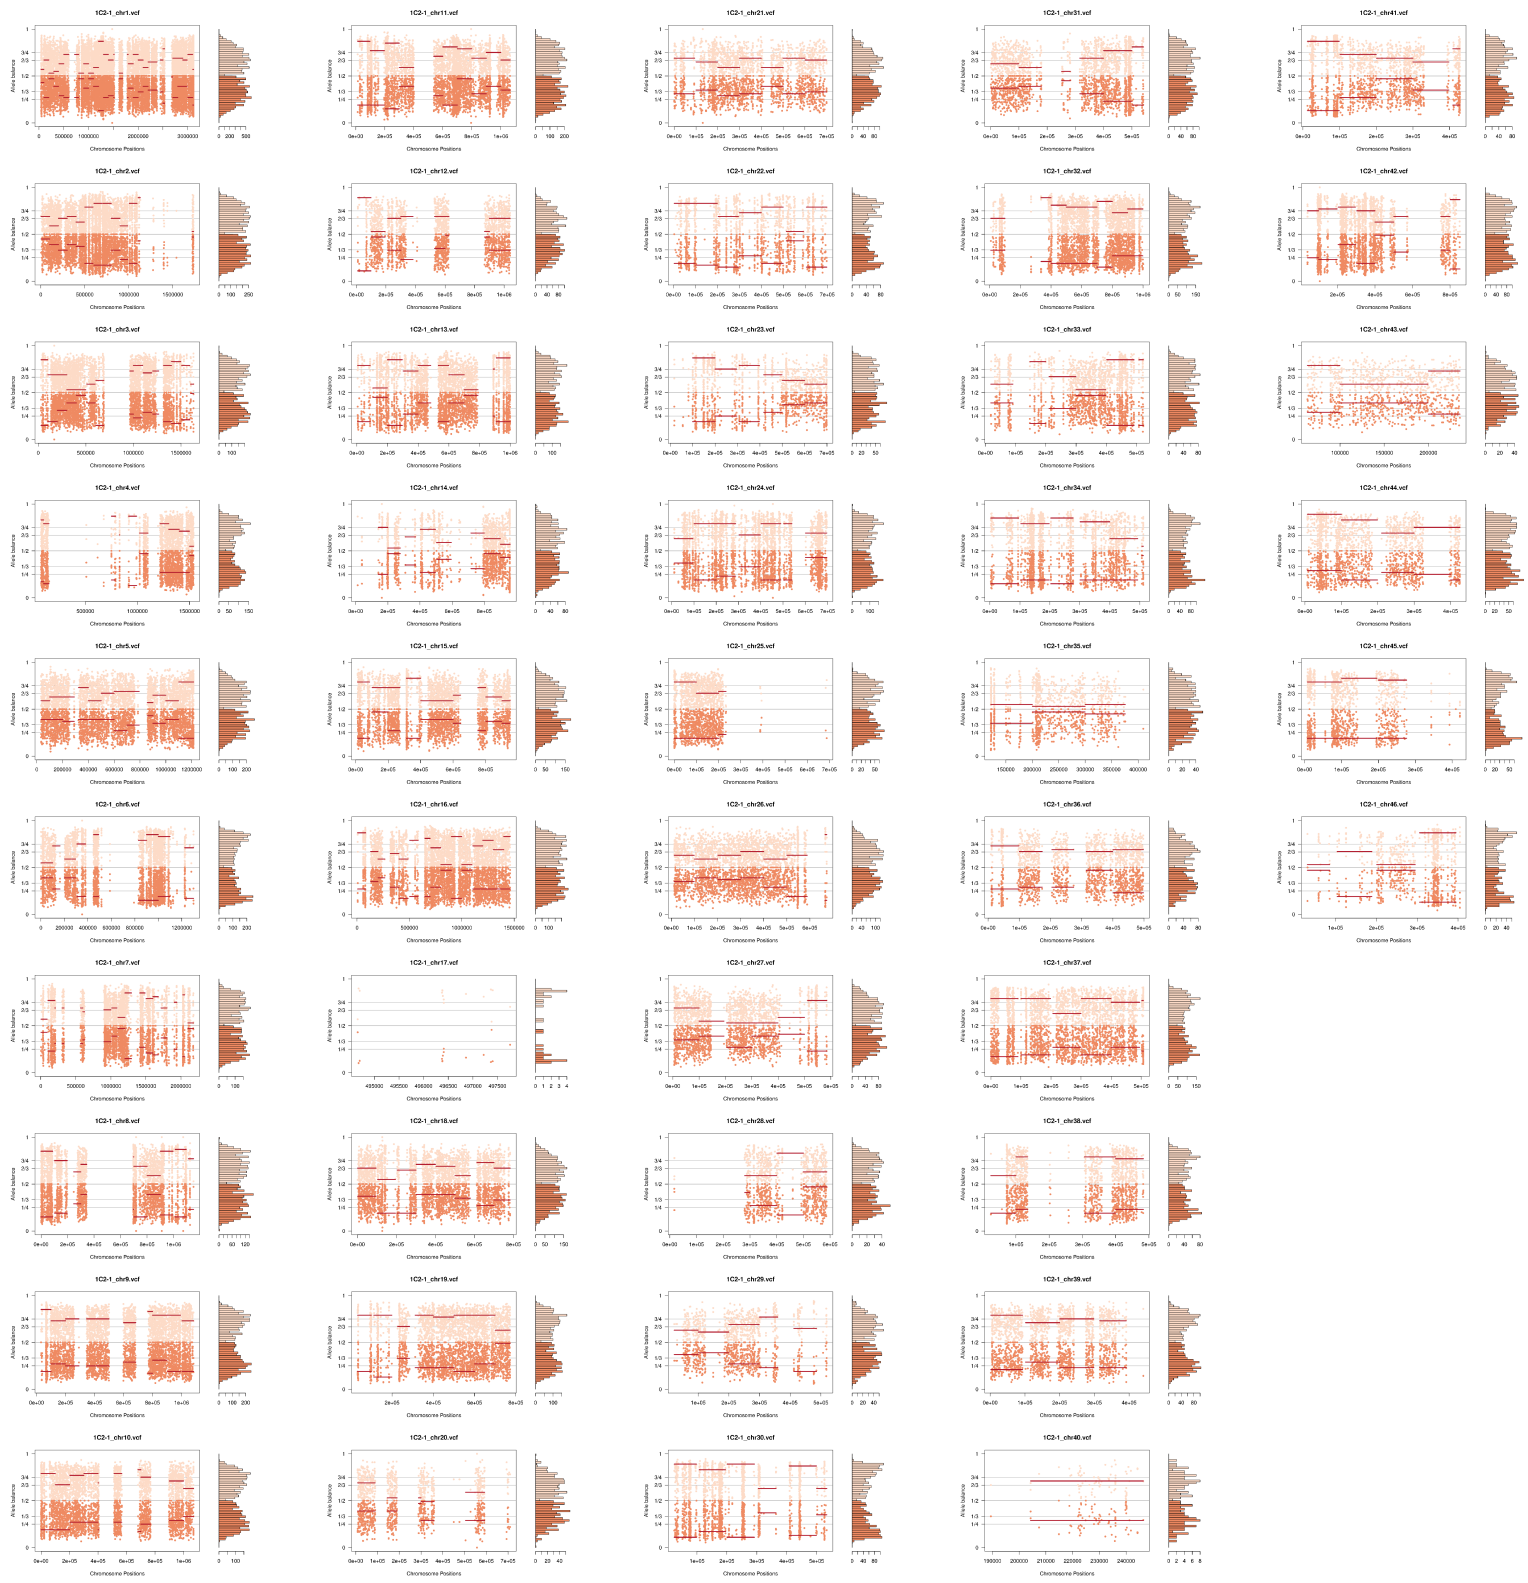

Supplement: supp [file elife-75237-supp-v1.zip]

A

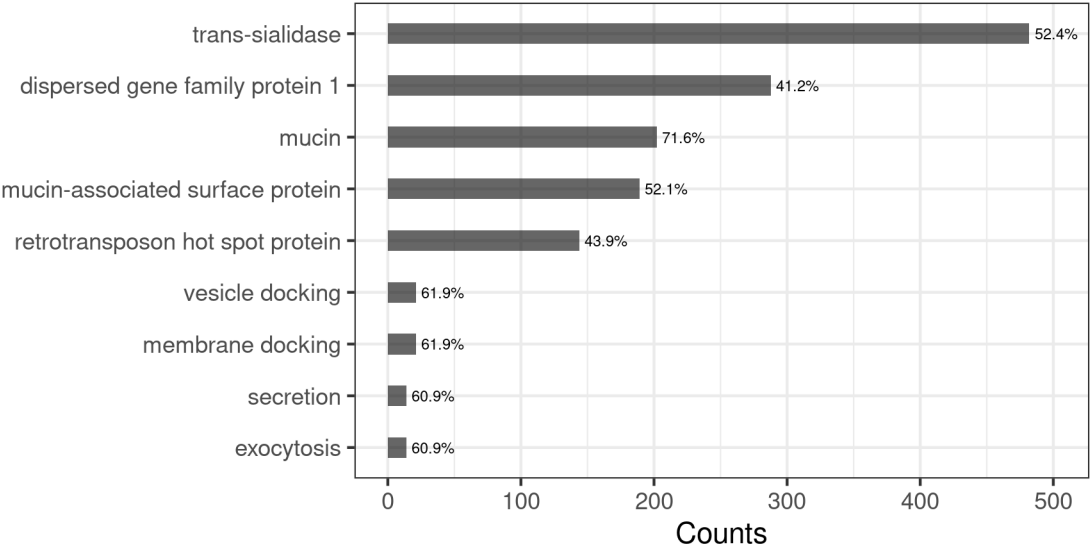

B

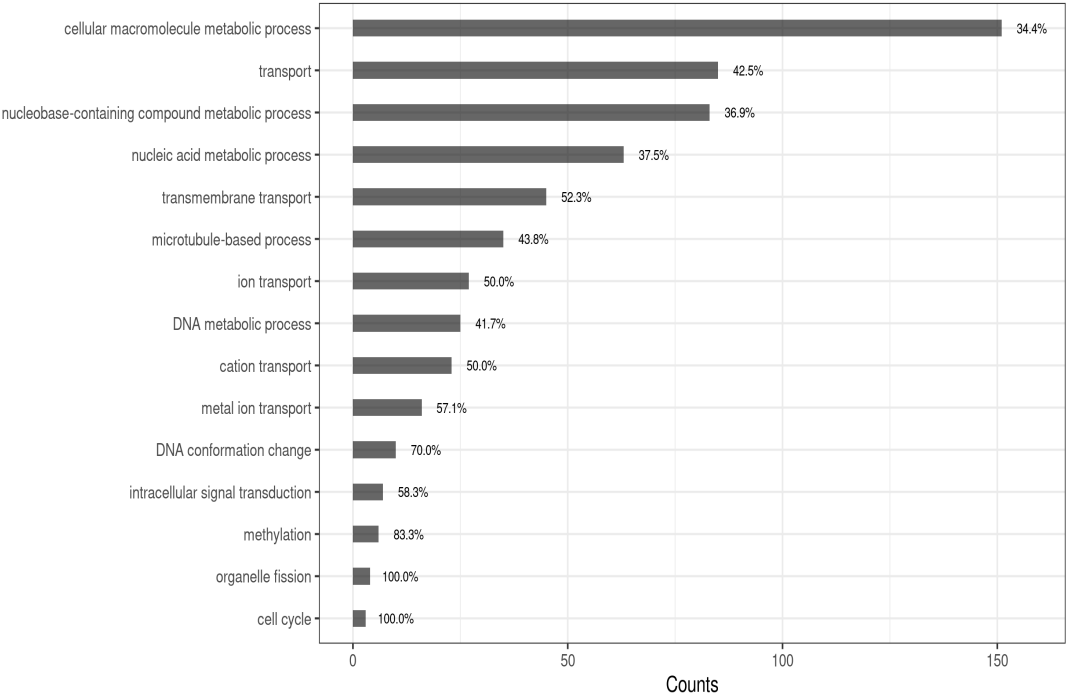

Supplement: supp [file elife-75237-supp-v1.zip]

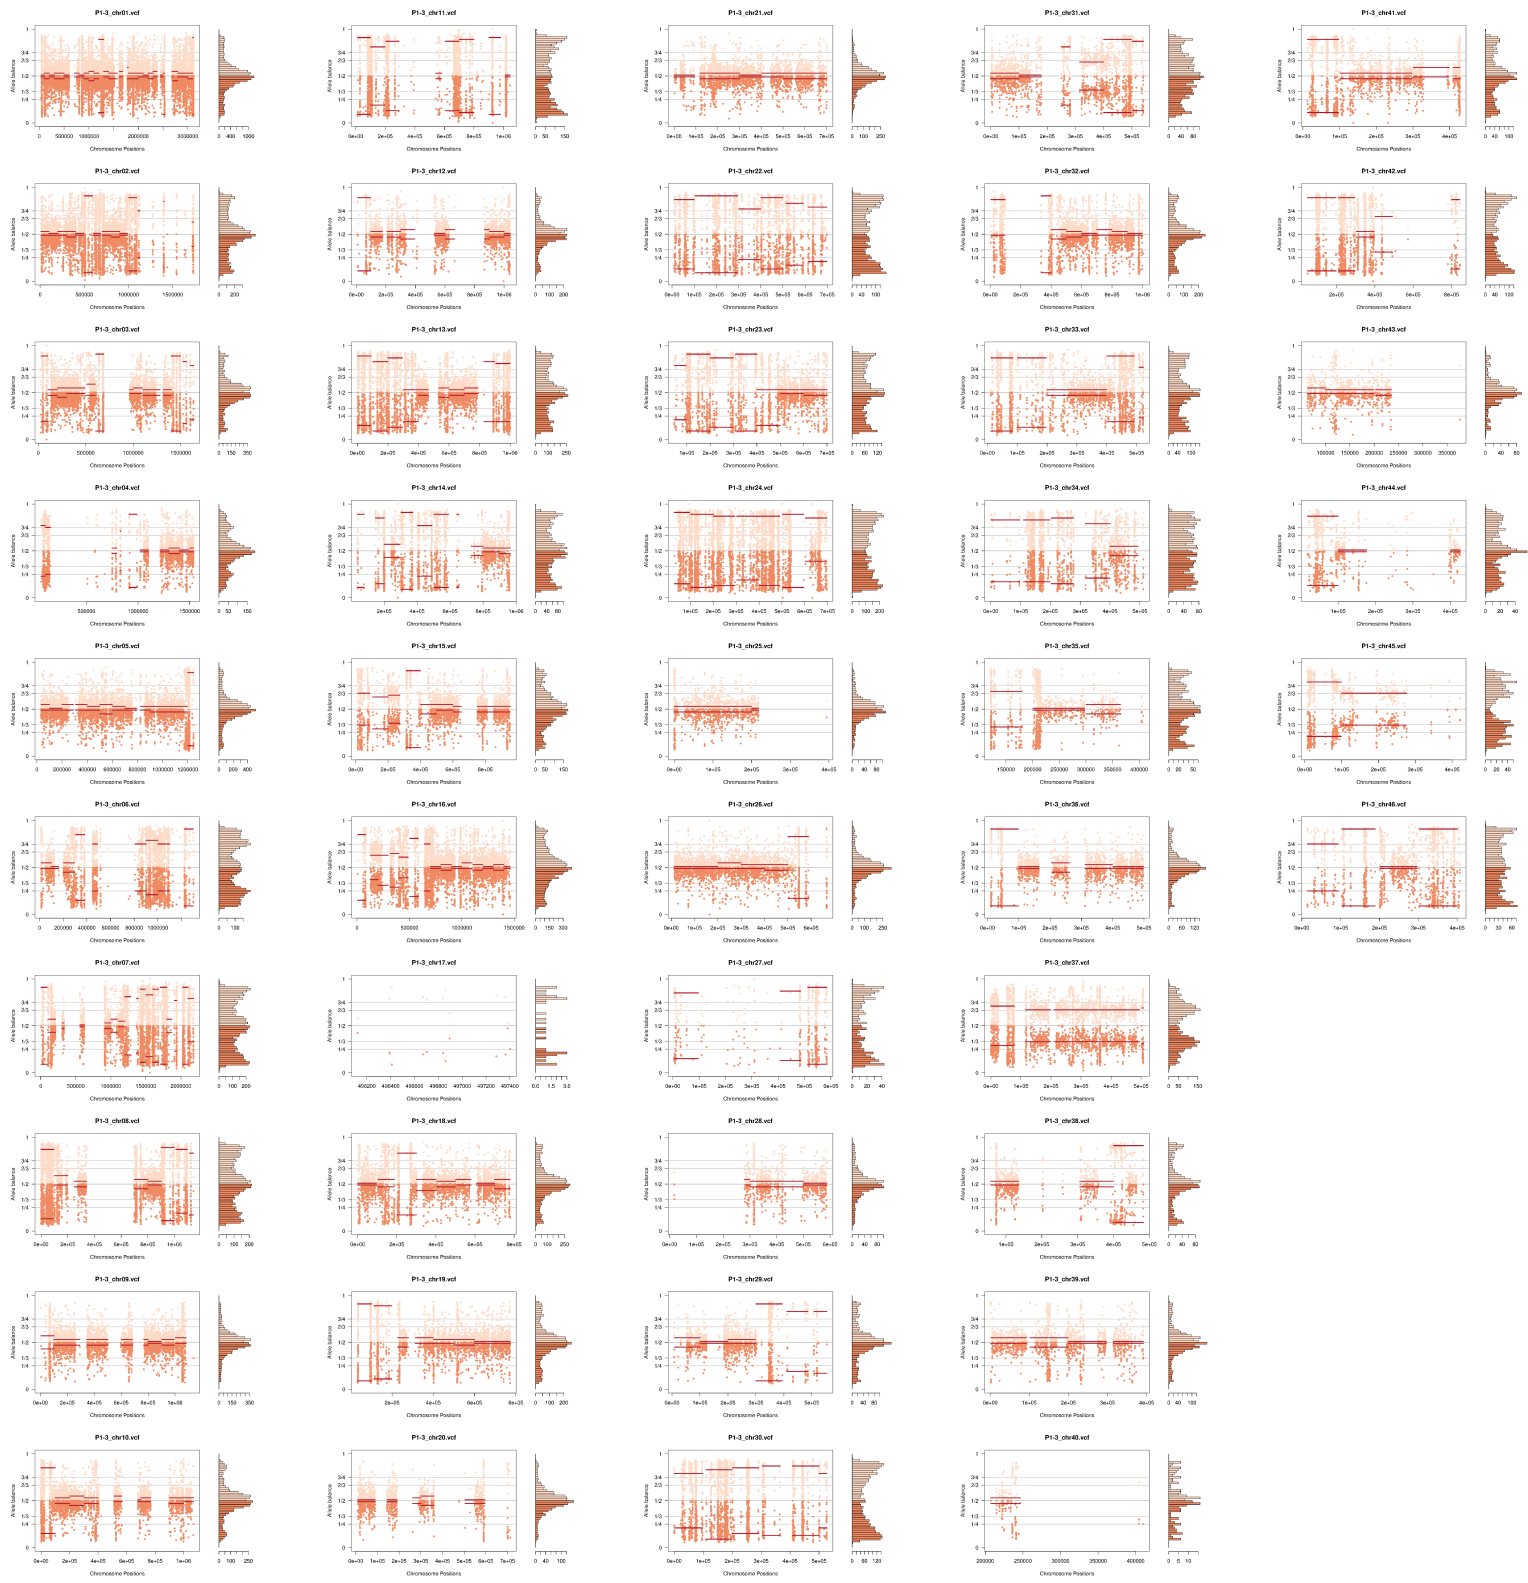

Supplement: supp [file elife-75237-supp-v1.zip]

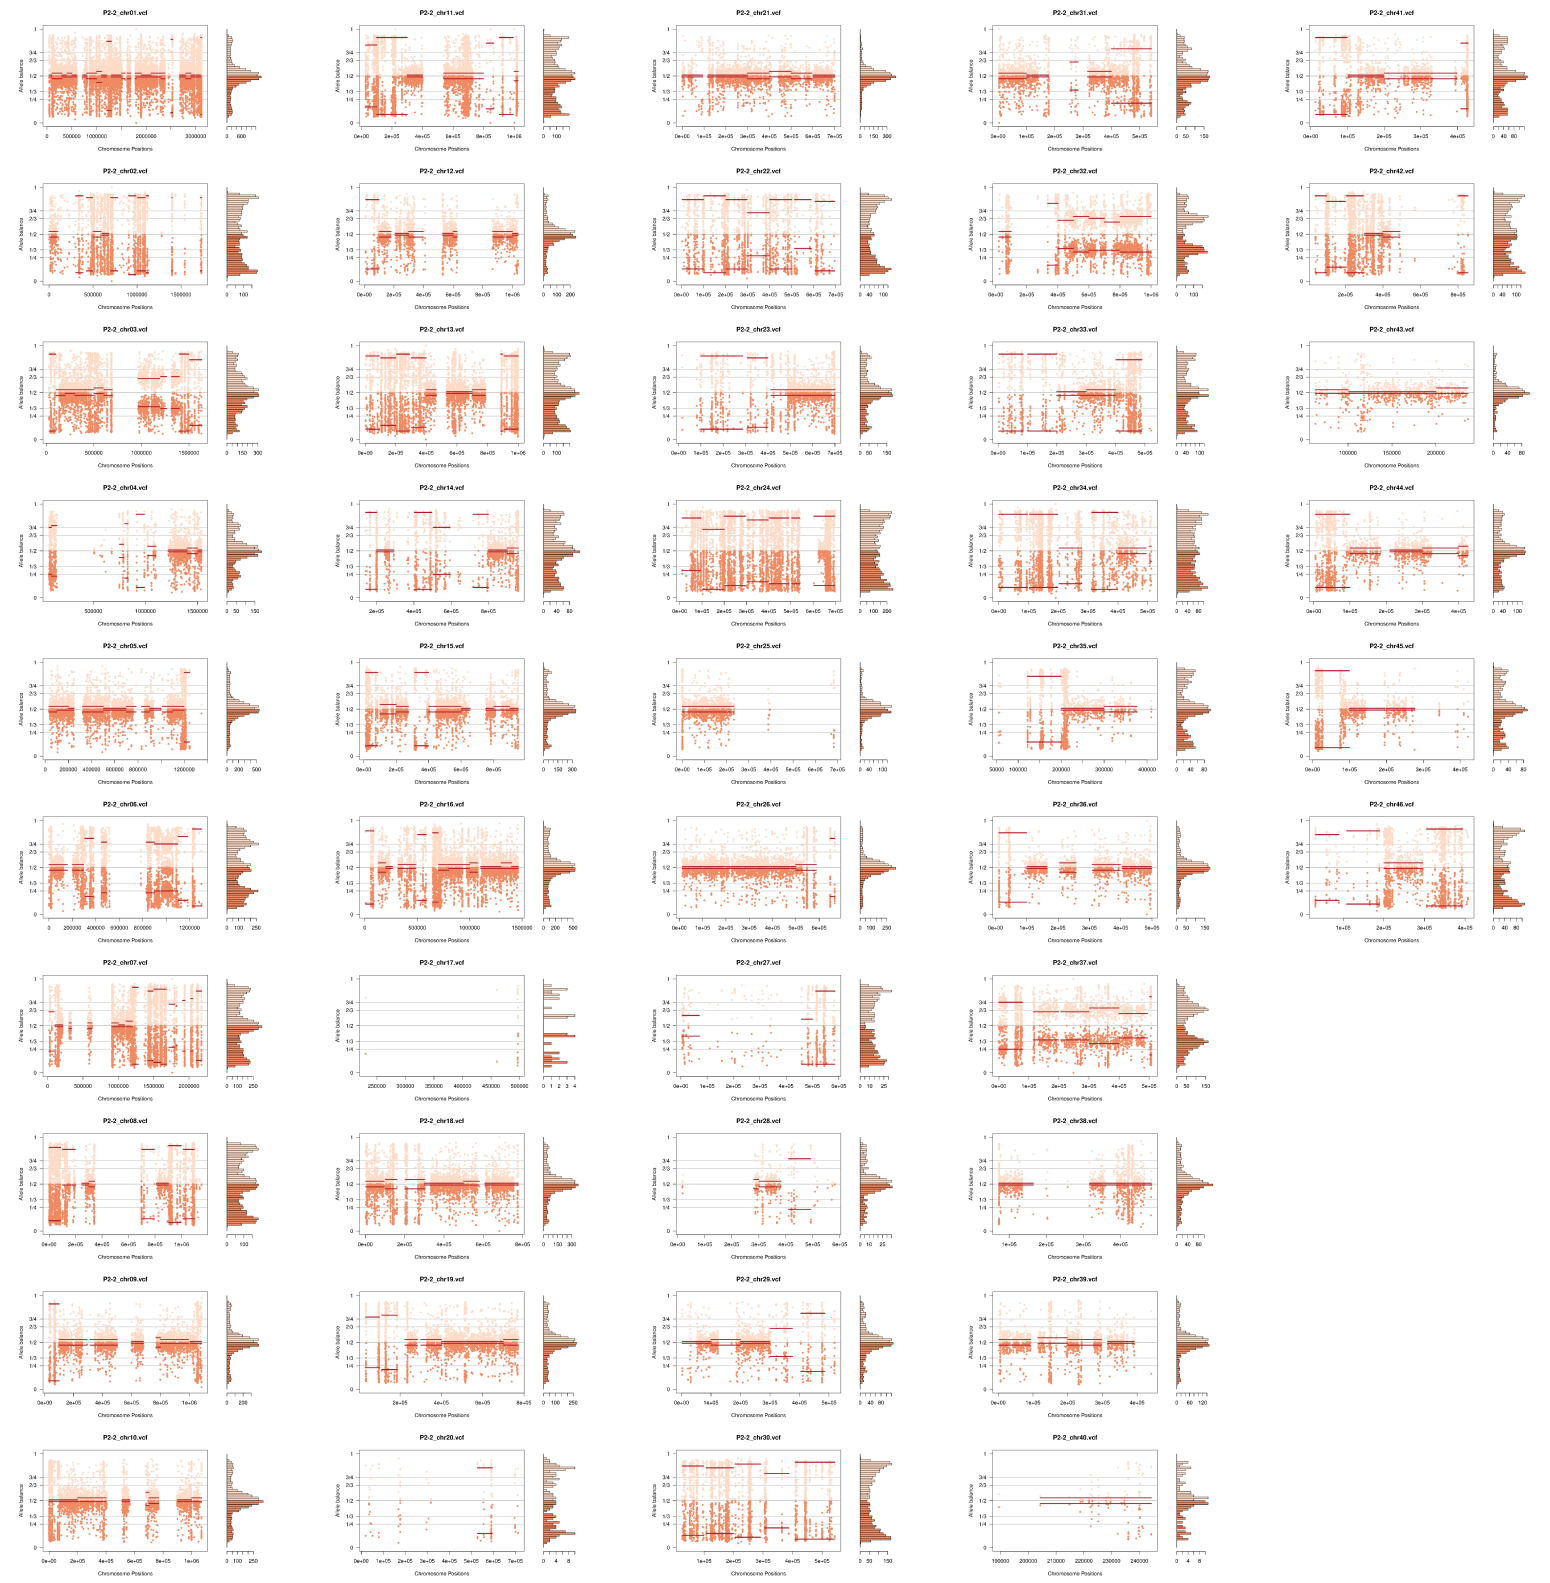

Supplement: supp [file elife-75237-supp-v1.zip]

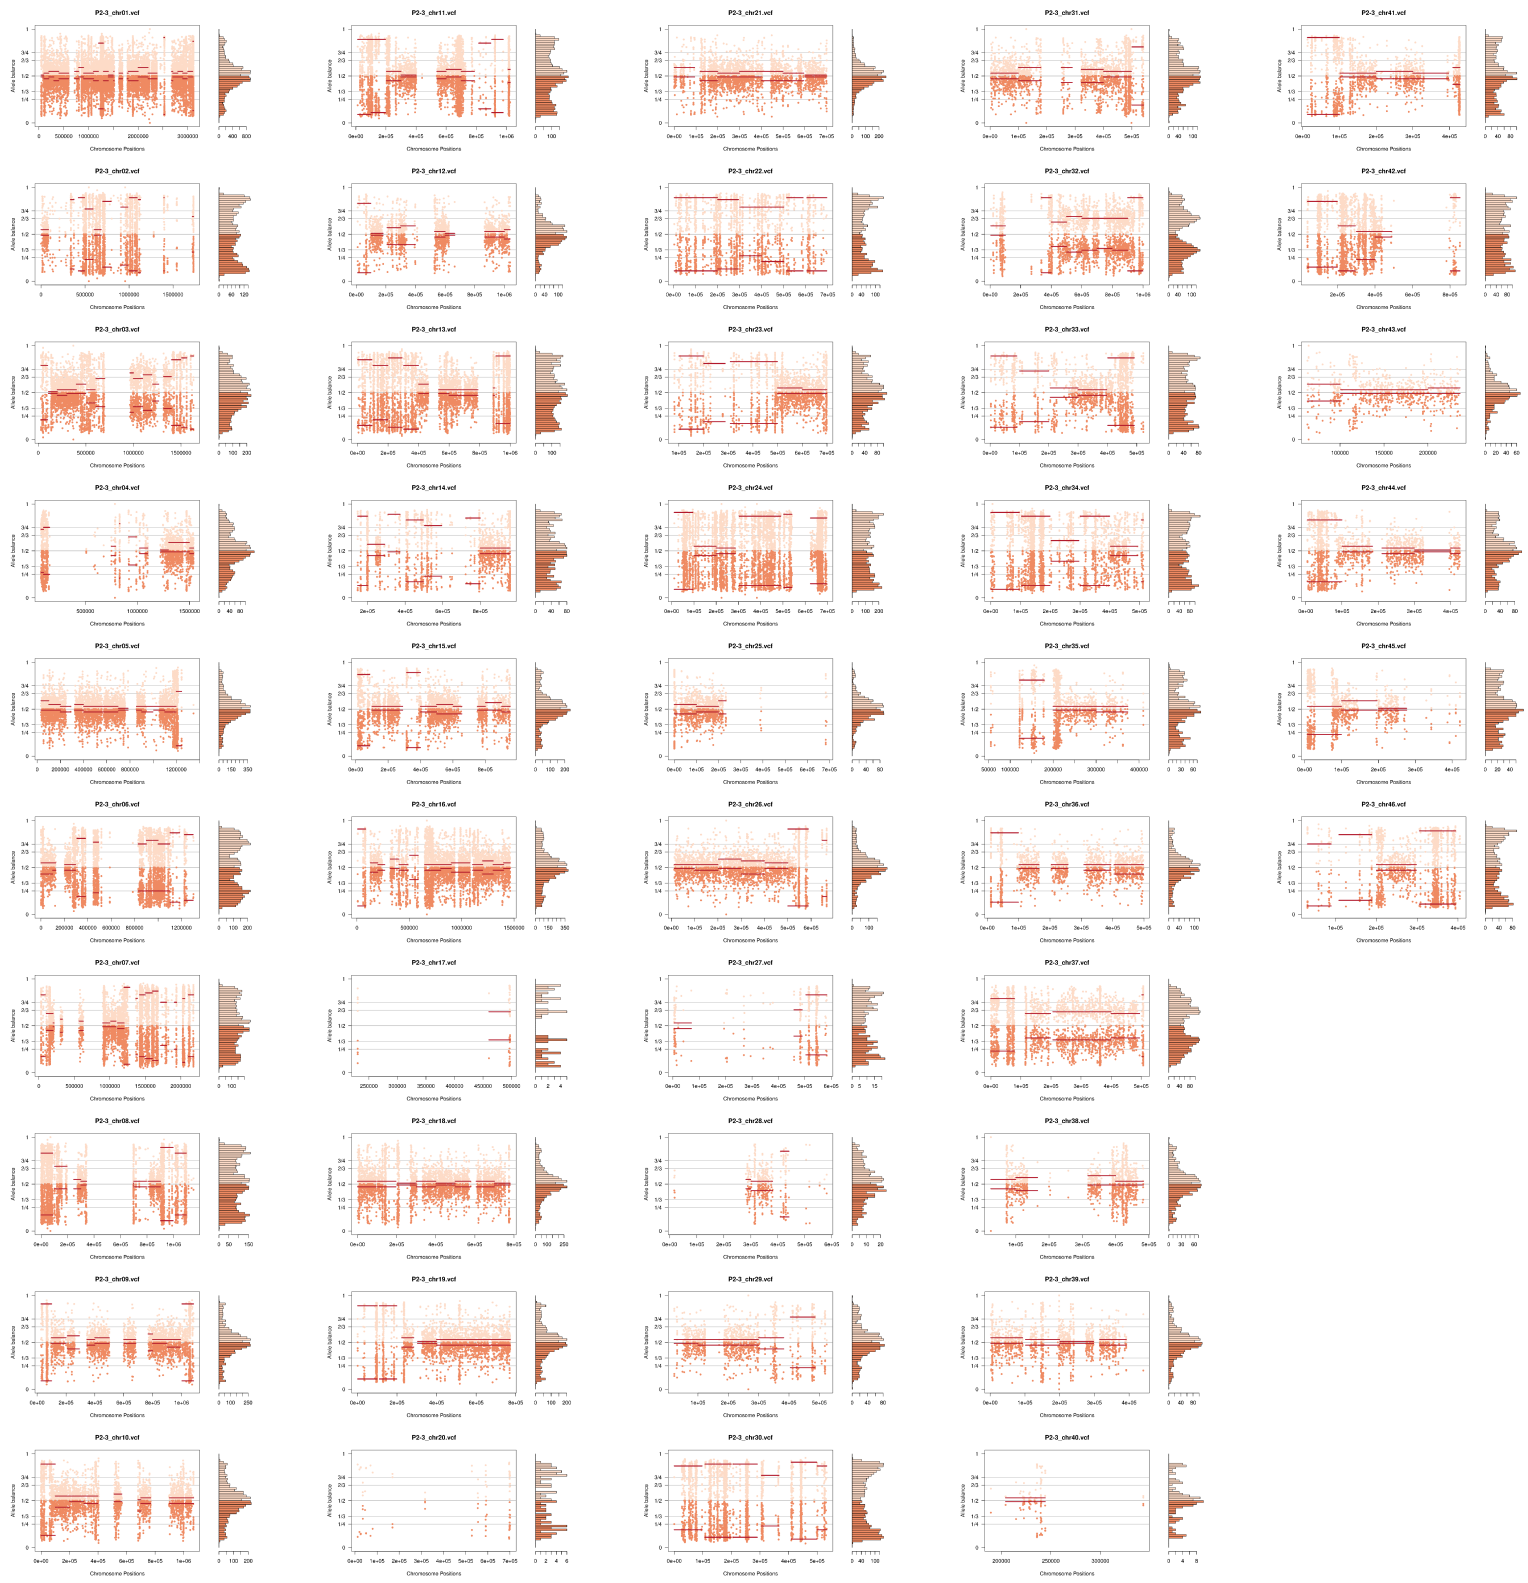

Supplement: supp [file elife-75237-supp-v1.zip]

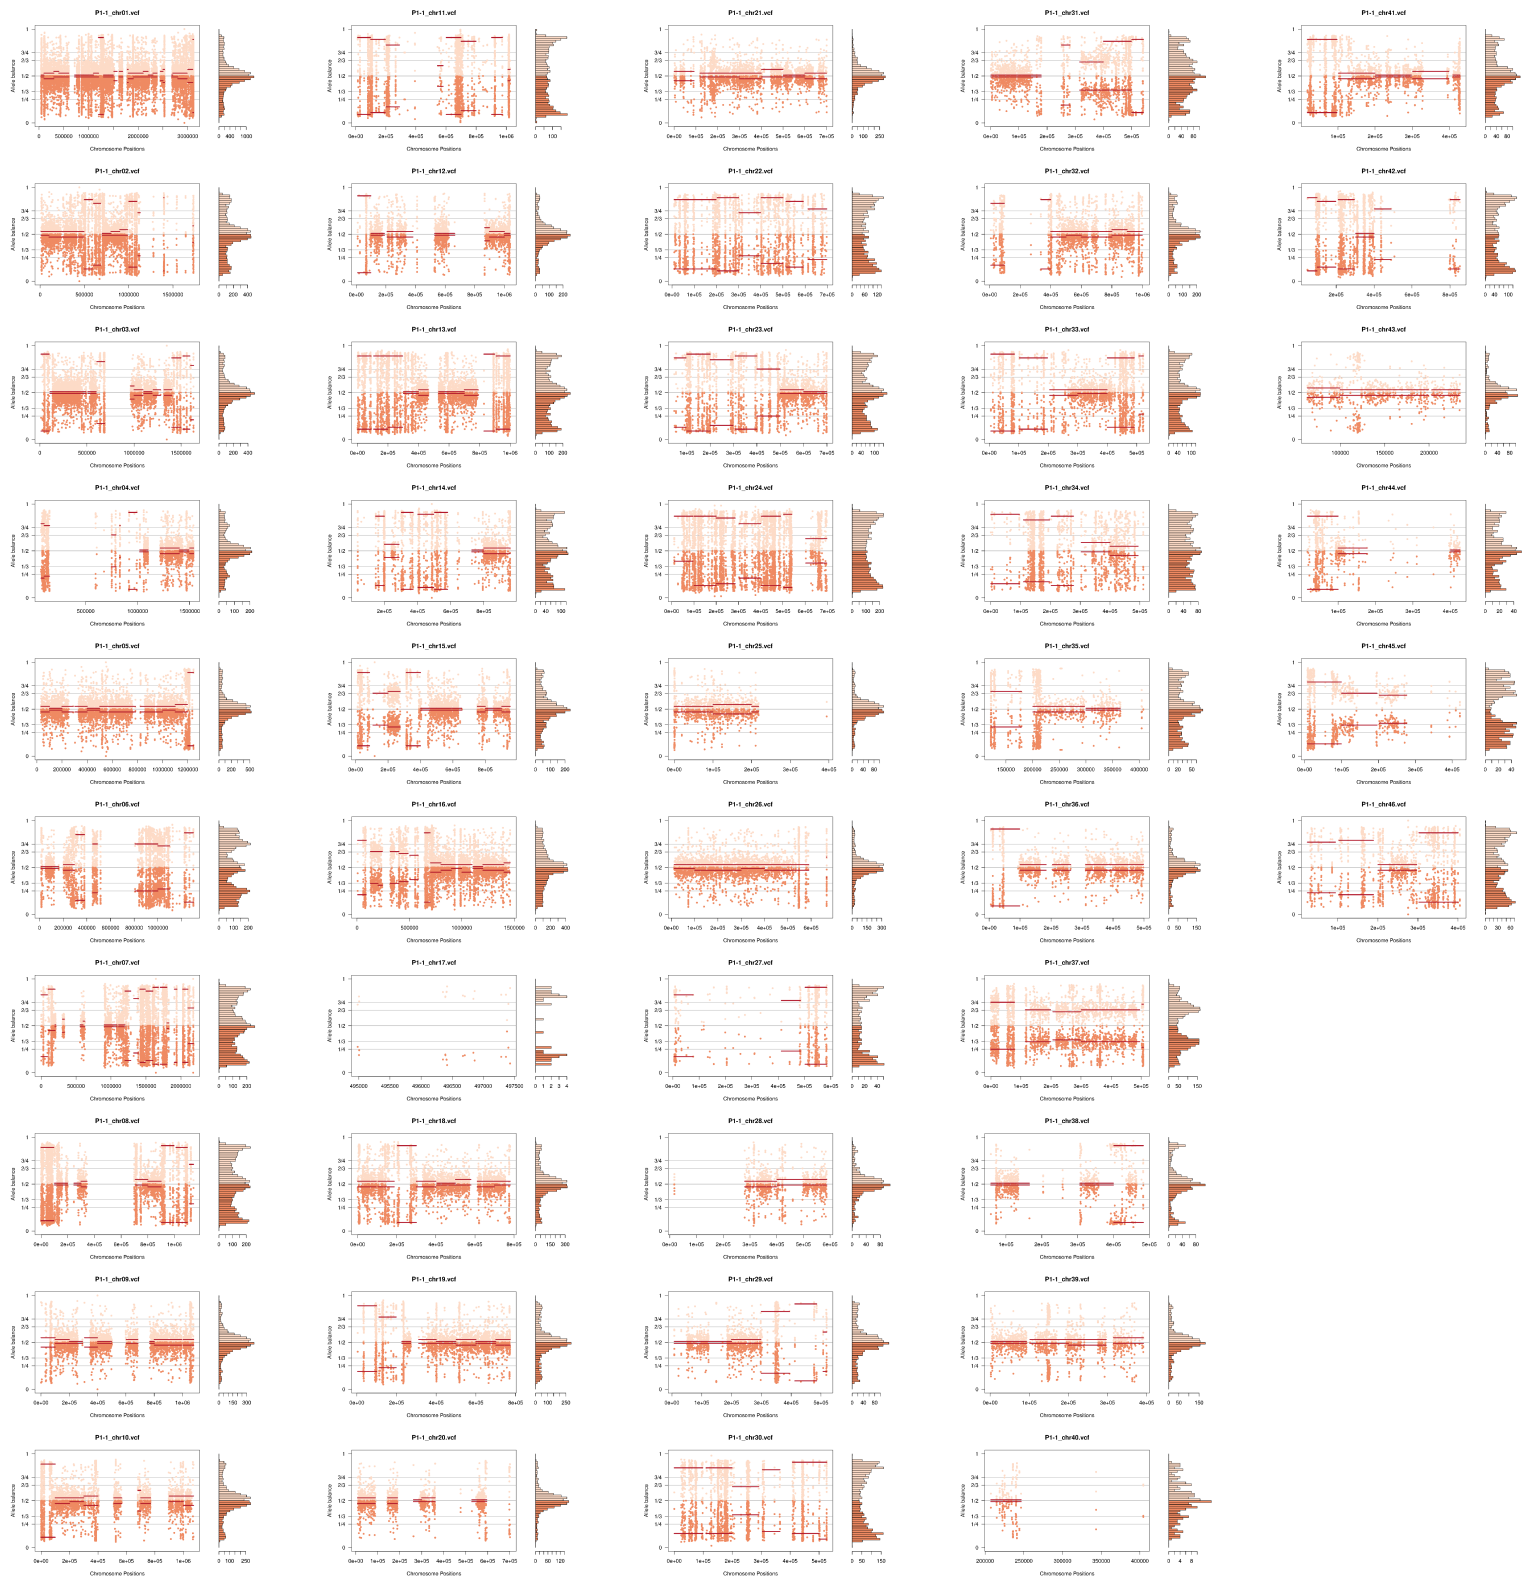

Supplement: supp [file elife-75237-supp-v1.zip]

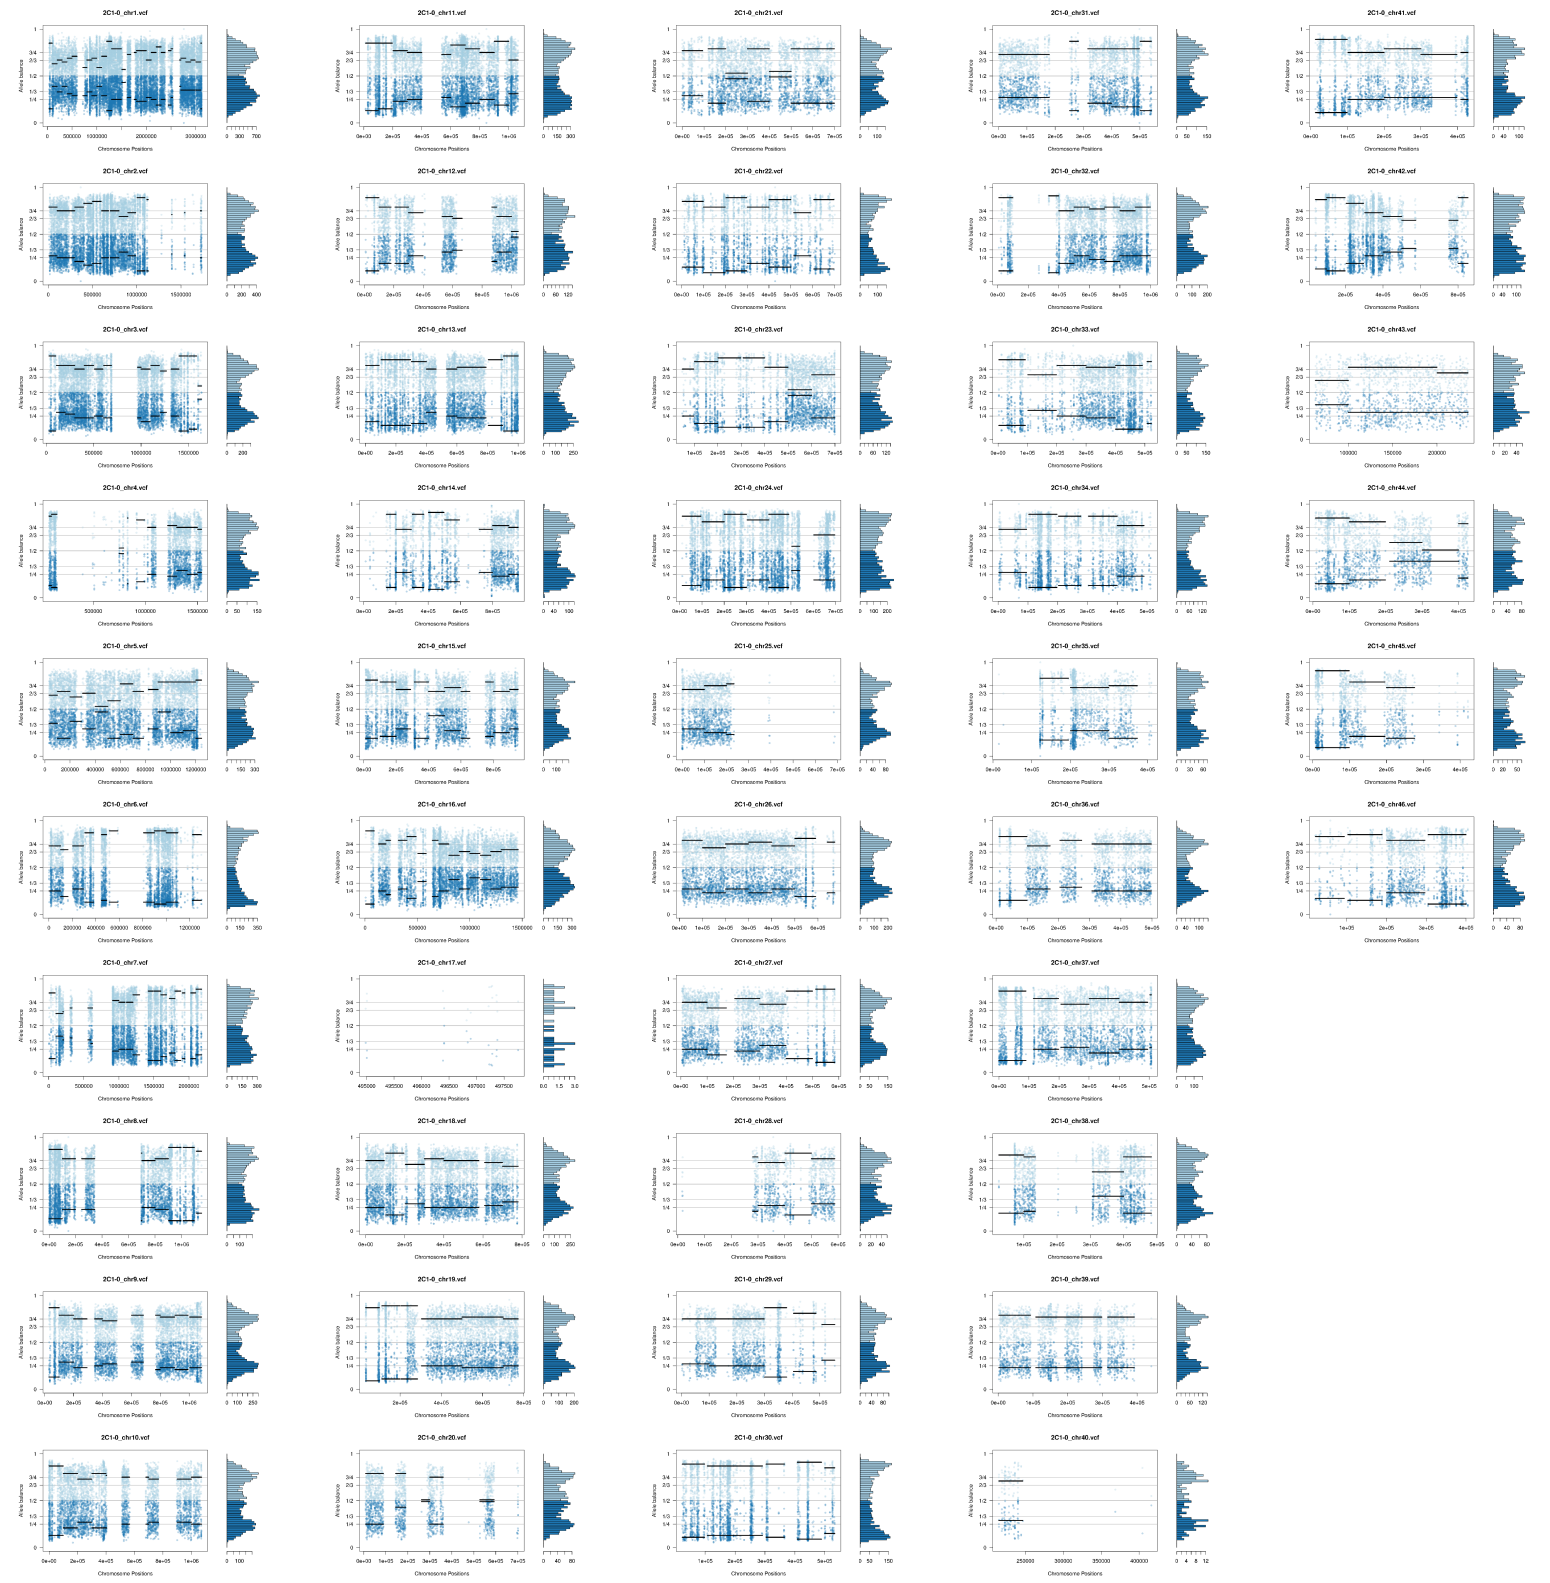

Supplement: supp [file elife-75237-supp-v1.zip]

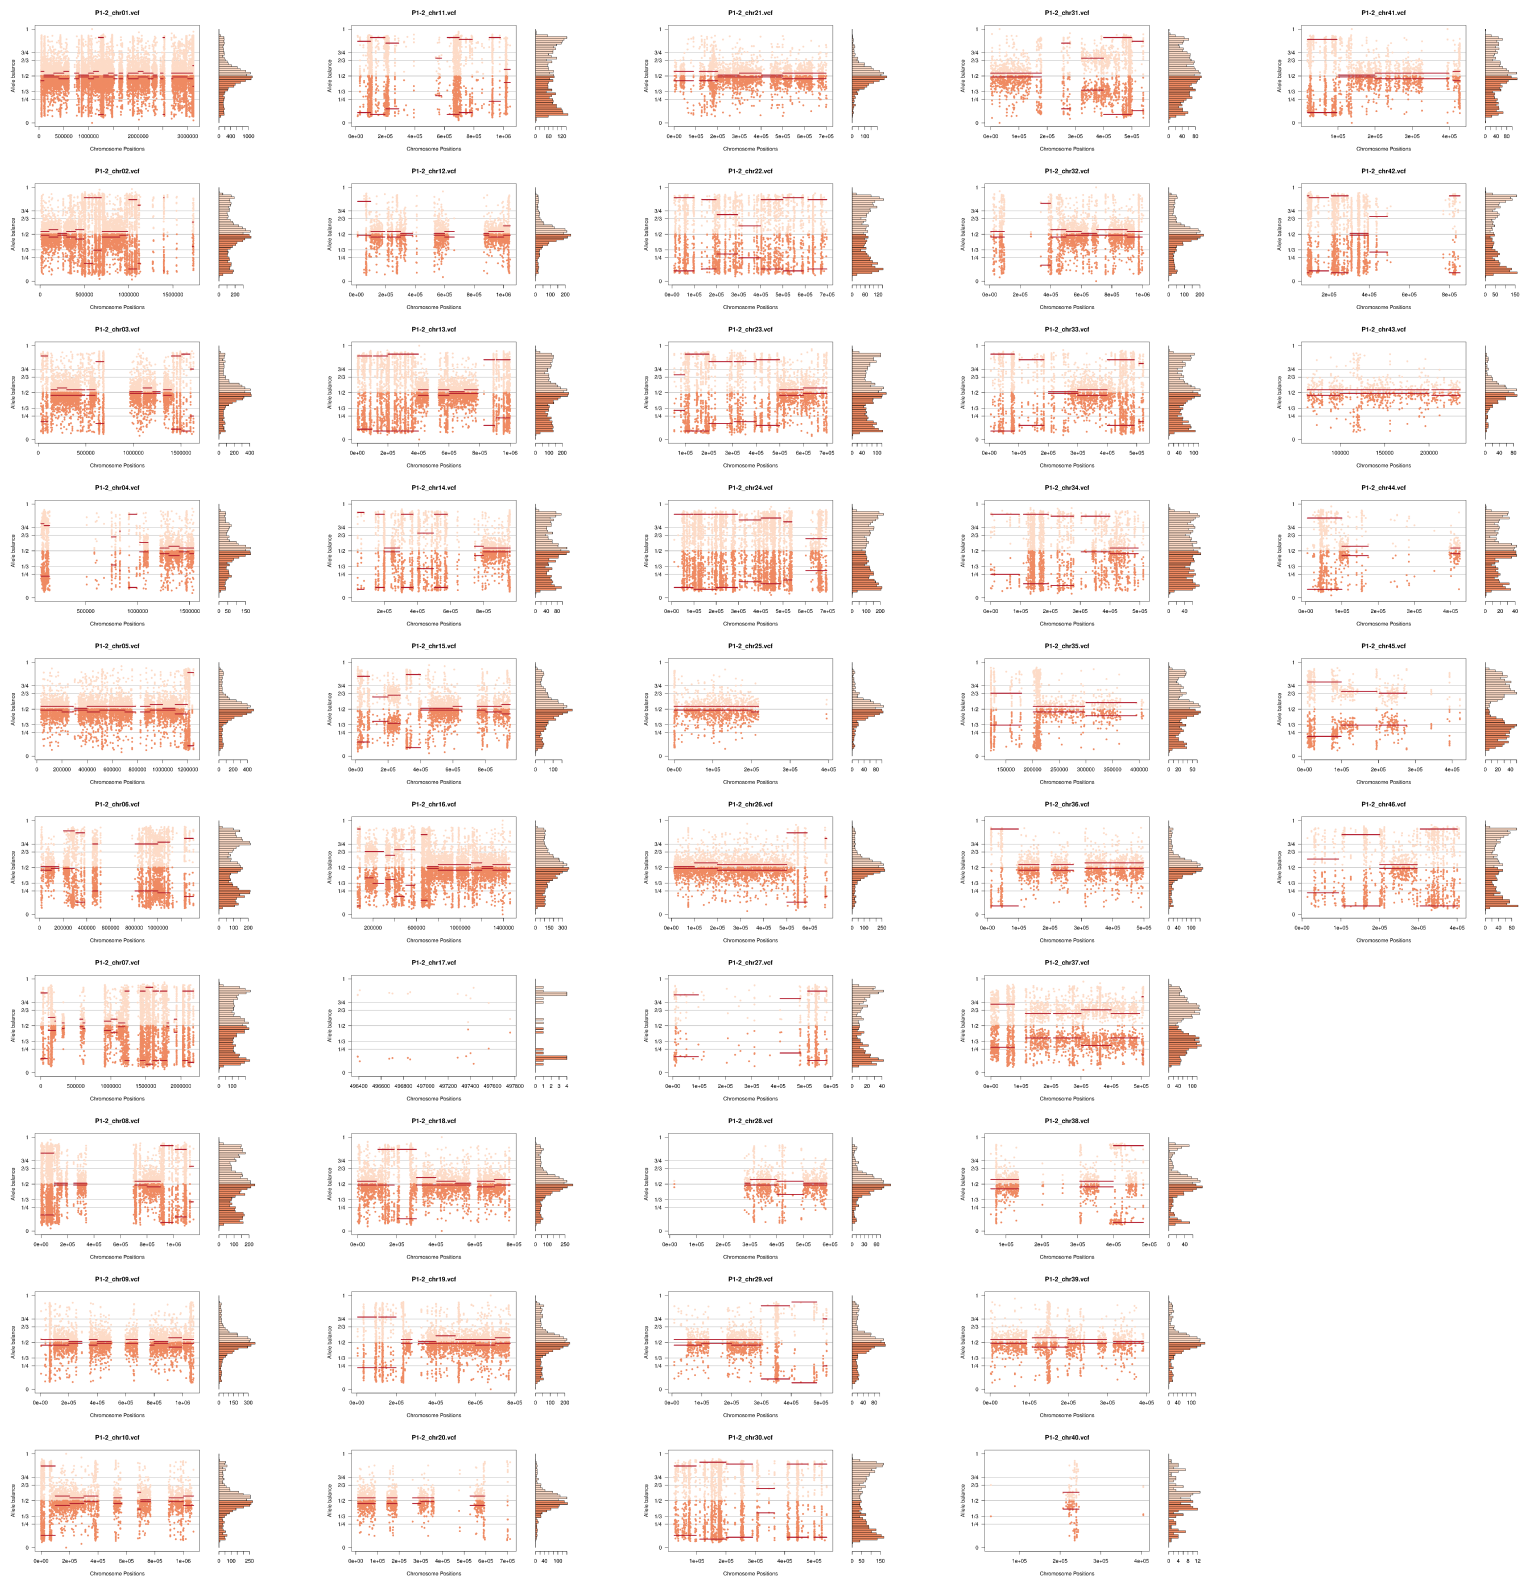

Supplement: supp [file elife-75237-supp-v1.zip]

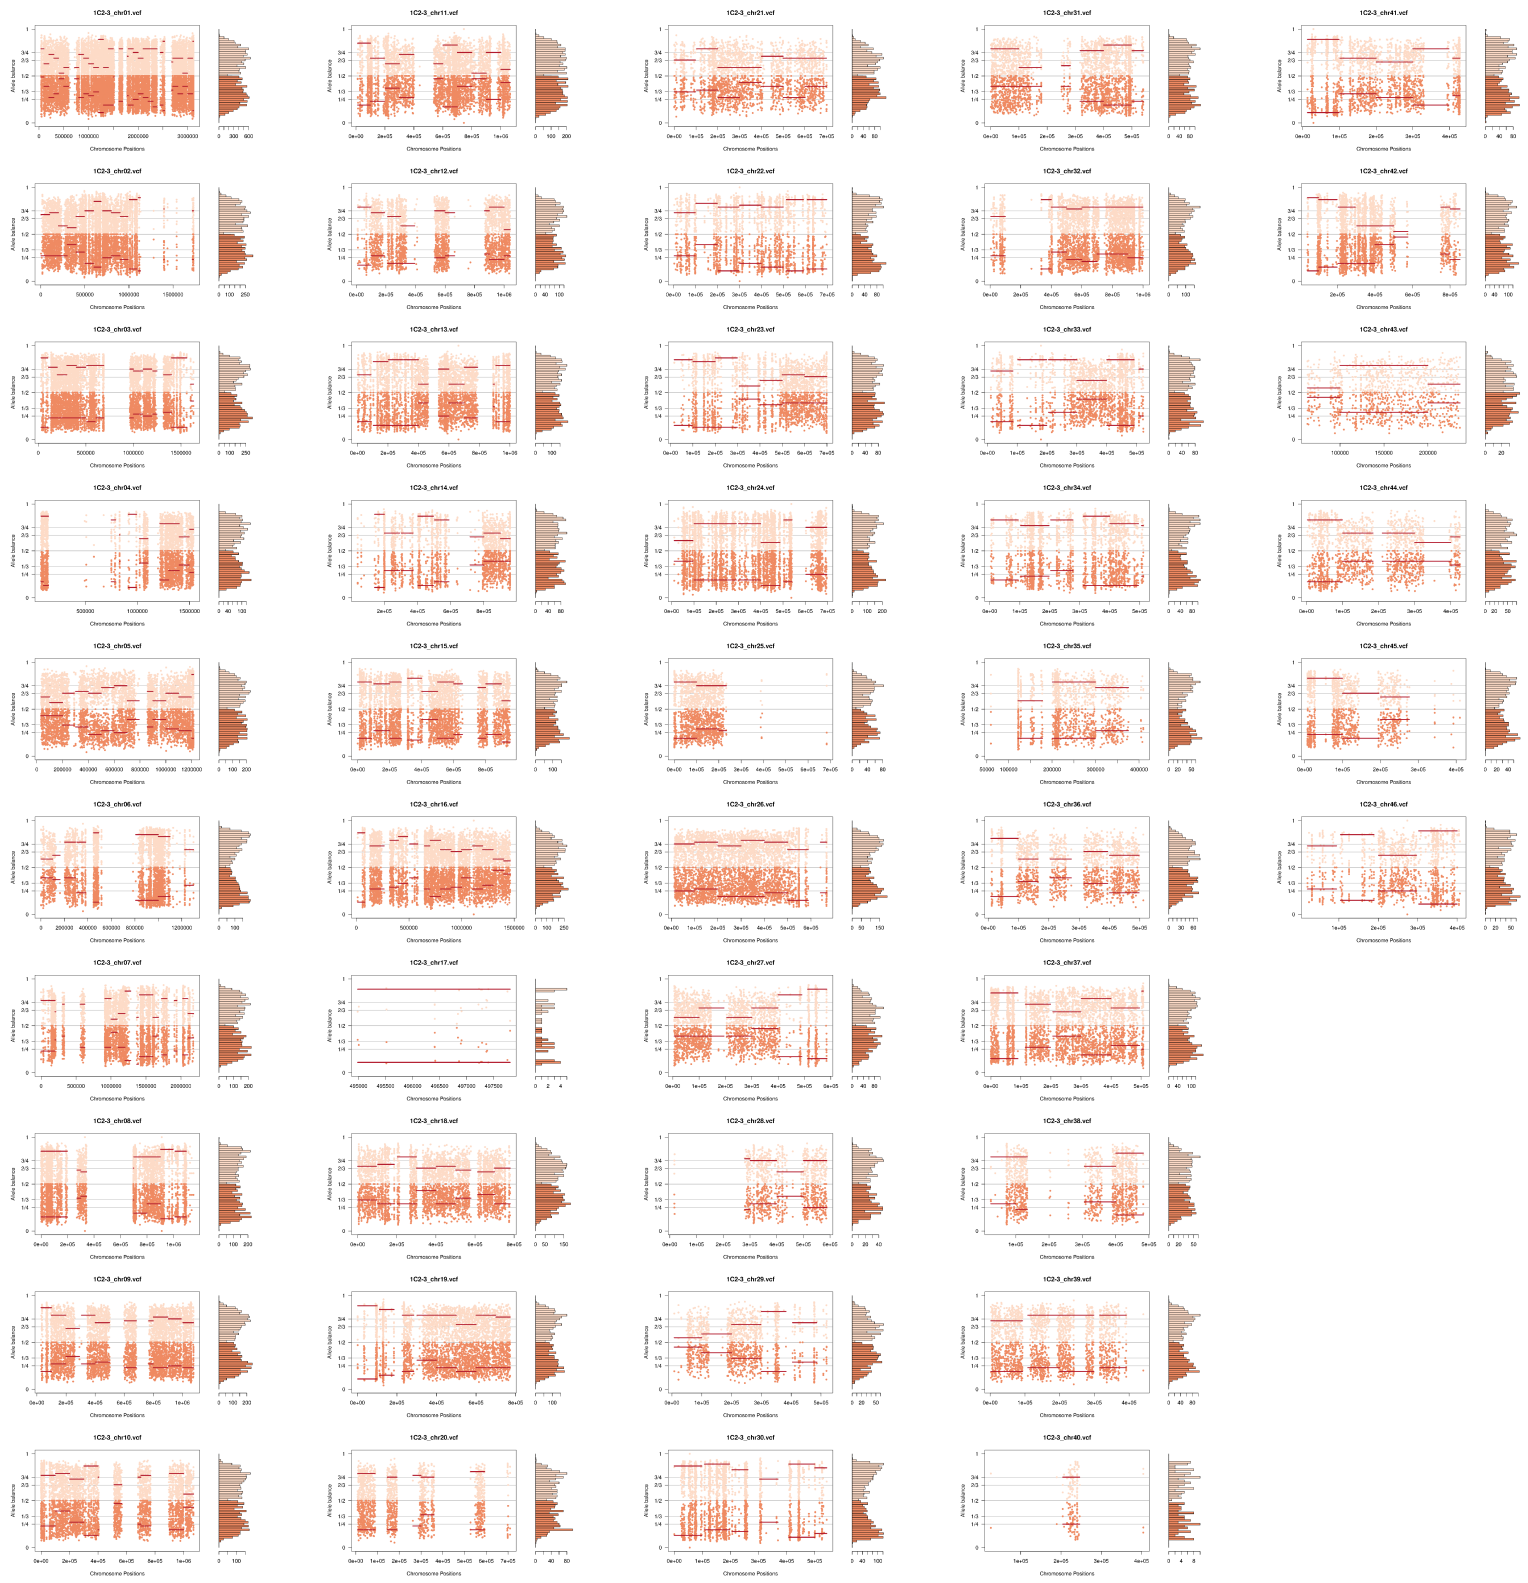

Supplement: supp [file elife-75237-supp-v1.zip]

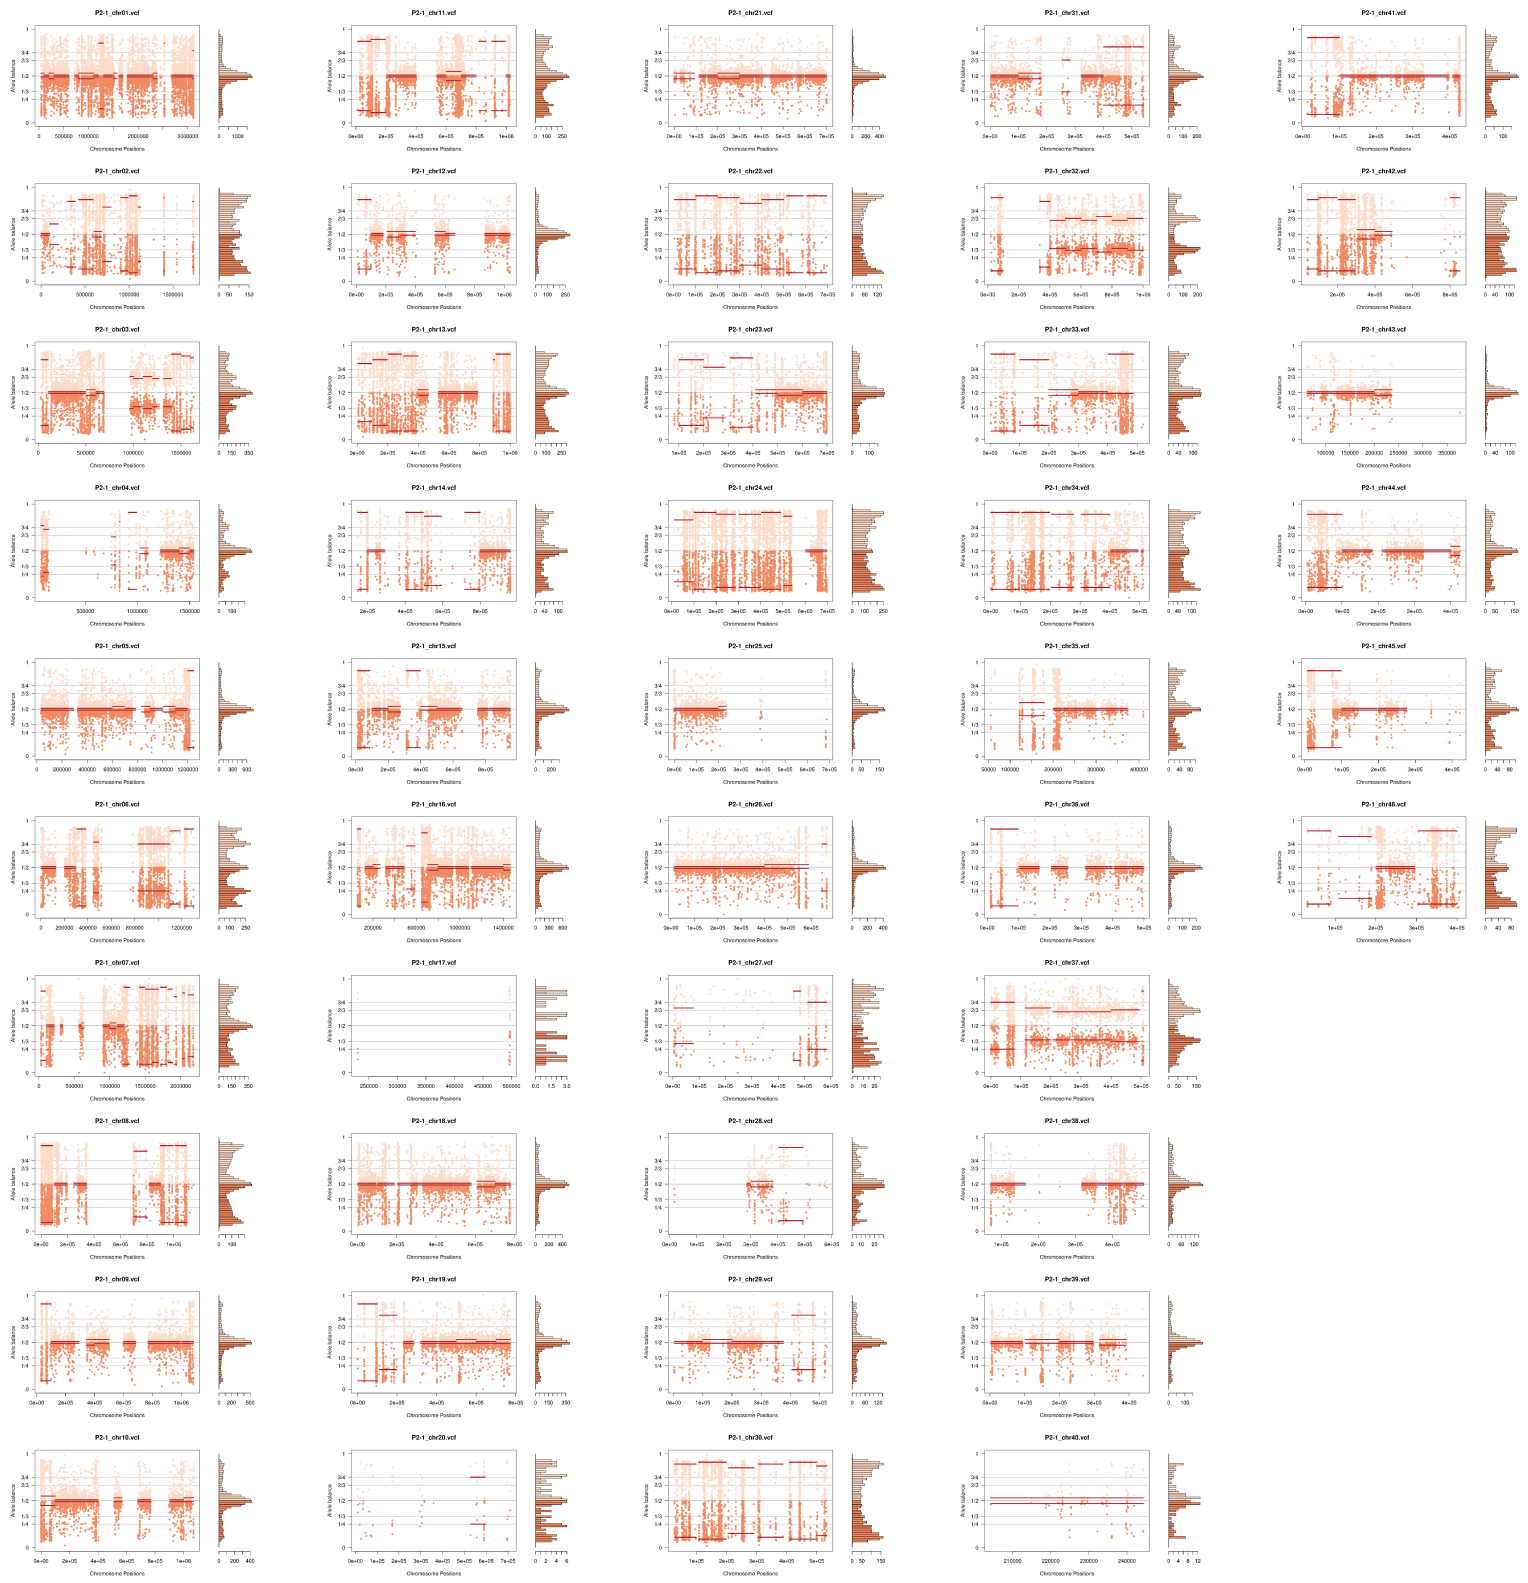

Supplement: supp [file elife-75237-supp-v1.zip]

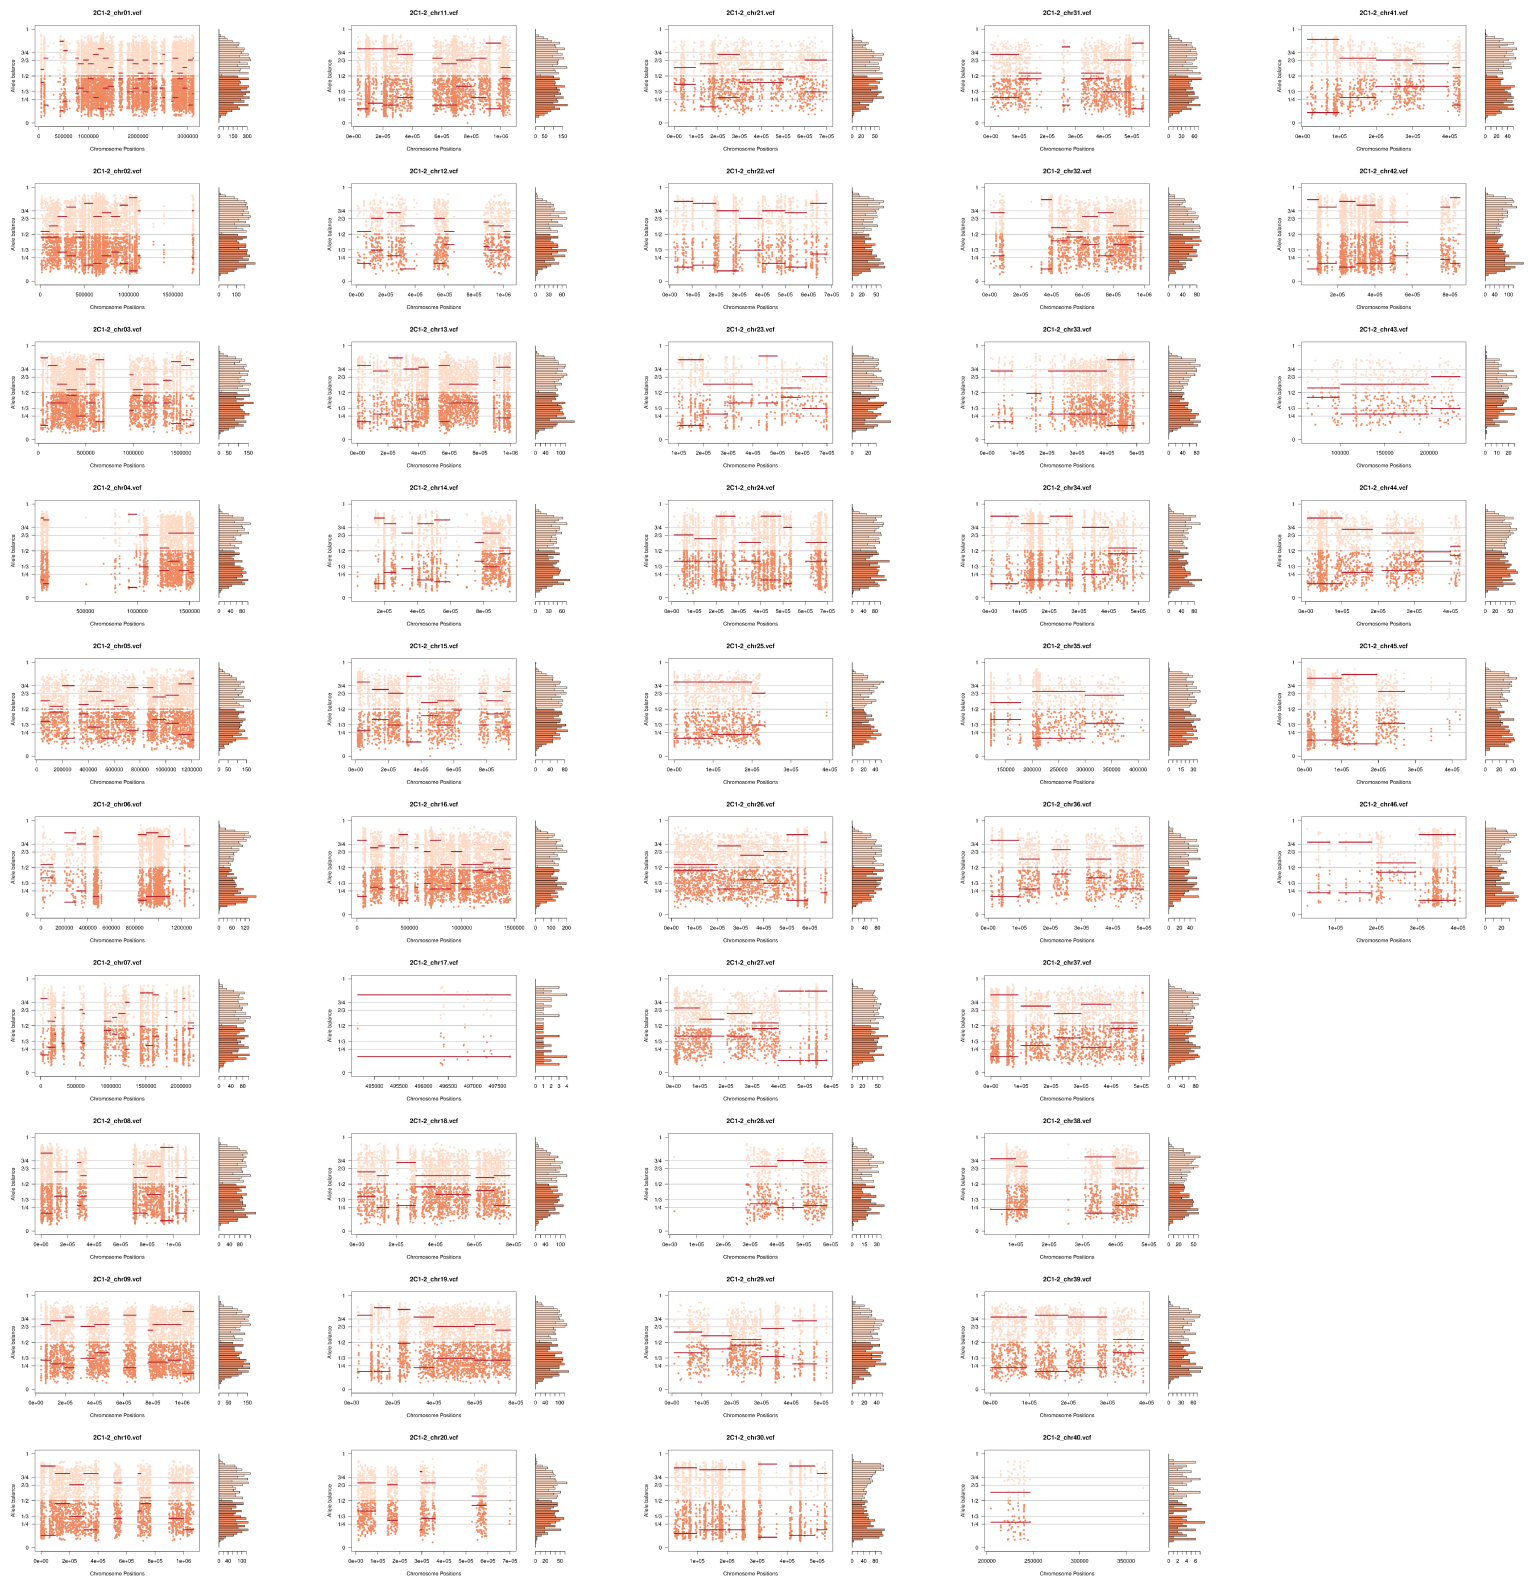

Supplement: supp [file elife-75237-supp-v1.zip]

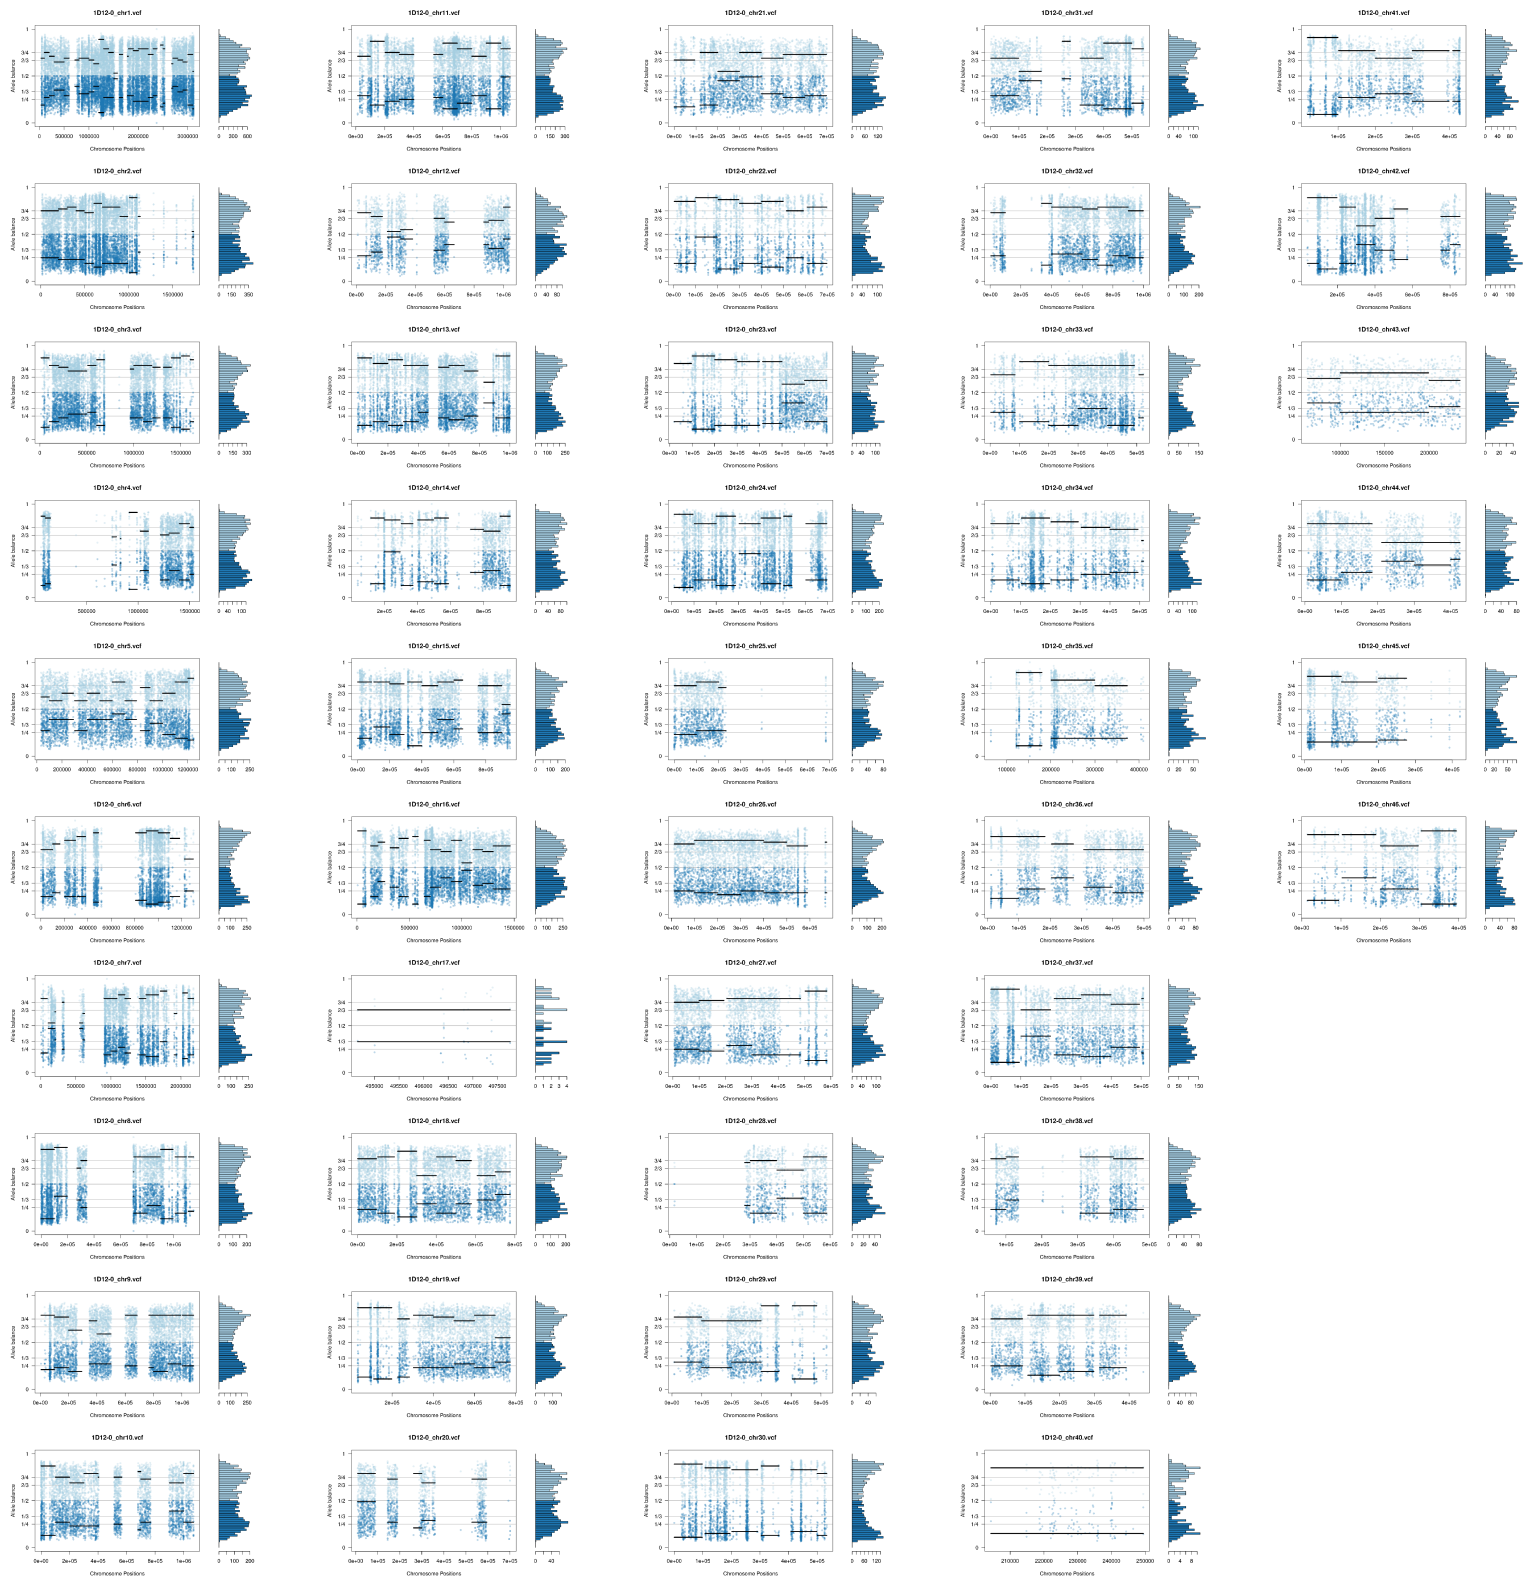

Supplement: supp [file elife-75237-supp-v1.zip]
